# Supplementary material for: Temperature induced single-crystal to single-crystal transformation of uranium azide complexes
Source: Royal Society of Chemistry journal article supplement (doi:10.1039/d4cc00546e), 2024-01-01
Supplement: d4cc00546e1.pdf [file d4cc00546e1.pdf]

Electronic Supplementary Information for  
**Temperature induced single-crystal to single-crystal transformation  
of uranium azide complexes**

Kai Li,<sup>a</sup> Thayalan Rajeshkumar,<sup>b</sup> Yue Zhao,<sup>a</sup> Tianwei Wang,<sup>a</sup> Laurent Maron\*<sup>b</sup> and  
Congqing Zhu\*<sup>a</sup>

<sup>a</sup> State Key Laboratory of Coordination Chemistry, Jiangsu Key Laboratory of  
Advanced Organic Materials, School of Chemistry and Chemical Engineering, Nanjing  
University, Nanjing 210023, China

<sup>b</sup> LPCNO, CNRS & INSA, Université Paul Sabatier, 135 Avenue de Rangueil, 31077  
Toulouse, France

\*Correspondence and requests for materials should be addressed to L.M. (E-mail:  
laurent.maron@irsamc.ups-tlse.fr) or to C.Z. (E-mail: zcq@nju.edu.cn).

**Contents**

|                                                |            |
|------------------------------------------------|------------|
| <b>1. Experimental Procedures.....</b>         | <b>S2</b>  |
| <b>2. Supporting Figures.....</b>              | <b>S4</b>  |
| <b>3. X-ray Crystallographic Analysis.....</b> | <b>S13</b> |
| <b>4. DFT Calculations.....</b>                | <b>S17</b> |
| <b>5. References.....</b>                      | <b>S58</b> |

## 1. Experimental Procedures

**General information:** All manipulations were performed under an N<sub>2</sub> atmosphere using standard Schlenk techniques or in an N<sub>2</sub> glovebox (<1 ppm O<sub>2</sub>/H<sub>2</sub>O). Solvents were dried and deoxygenated by distillation under nitrogen and further dried over 4 Å molecular sieves before use. THF-d<sub>8</sub> was dried over Na/K and stored under an N<sub>2</sub> atmosphere prior to use. Complex **1** was synthesized by reported procedure.<sup>1</sup> Other reagents were purchased and used without further purification. Nuclear magnetic resonance (NMR) spectroscopy was performed using a Bruker AVIII-400 (<sup>1</sup>H 400 MHz; <sup>31</sup>P{<sup>1</sup>H} 162 MHz) spectrometer. Absolute values of the coupling constants ( $\delta$ ) are provided in Hertz (Hz). Multiplicities of peaks are abbreviated as single (s), double (d), triplet (t), multiplet (m) or broad (br). Magnetic measurements on crystalline samples were performed using a Quantum Design SQUID VSM magnetometer from 370.0 to 1.8 K under an external magnetic field of 1000 Oe. Fourier transform infrared spectra (FT-IR) were measured on a Nicolet FTIR 170X spectrophotometer in the range of 2200-200 cm<sup>-1</sup> at 25 °C using KBr plates. UV-vis-NIR absorption spectra were recorded on a Lambda 750 spectrometer at RT in THF. Elemental analyses (C, H, N) were performed on a Vario MICRO elemental analyser at the Center of Modern Analysis of Nanjing University.

### Synthesis of complex **2**

Complex **1** (71.5 mg, 0.1 mmol) and NaN<sub>3</sub> (13.0 mg, 0.2 mmol) were added to a 5 mL flask and dissolved in THF (2 mL). The mixture was stirred at RT for 10 h and then the solvent was removed and the residue was extracted with ether (3 mL). The filtrate was dried at 60 °C to afford complex **2** as a pure yellow solid (56.8 mg, 78%). Crystal of **2** compatible for X-ray diffraction were grown from a saturated solution in ether (2 mL) stored at 60 °C. <sup>1</sup>H NMR (d<sub>8</sub>-THF, 400 MHz, ppm, 60 °C): 44.1 (s, 2H, CH<sub>2</sub>), 30.8 (s, 2H, CH<sub>2</sub>), 17.9 (s, 7H, CH(CH<sub>3</sub>)<sub>2</sub>), 5.1 (s, 6H, N(CH<sub>3</sub>)<sub>2</sub>), -58.8 (s, 7H, CH(CH<sub>3</sub>)<sub>2</sub>). <sup>31</sup>P{<sup>1</sup>H} NMR (d<sub>8</sub>-THF, 162 MHz, ppm): no signal was not observed in the range of +1000 ~ -1000 ppm. Anal. Calcd (%) for C<sub>20</sub>H<sub>48</sub>N<sub>10</sub>P<sub>2</sub>U: C, 32.97; H, 6.64; N, 19.22. Found: C, 32.71; H, 6.22; N, 18.69. FT-IR  $\nu$ /cm<sup>-1</sup> (KBr): 2953 (w), 2863 (w), 2777 (w), 2075 (s, terminal N<sub>3</sub><sup>-</sup>), 1464 (w), 1351 (w), 1279 (w), 1235 (w), 1134 (w), 1017 (w), 939 (w), 877 (w), 777 (w), 646 (w), 604 (w), 528 (w).

### Synthesis of complex 3

Complex 1 (71.5 mg, 0.1 mmol) and NaN<sub>3</sub> (13.0 mg, 0.2 mmol) were added to a 5 mL flask and dissolved in THF (2 mL). The mixture was stirred at RT for 10 h and then the solvent was removed under reduced pressure and the residue was extracted with ether (3 mL). The filtrate was stored at -20 °C to afford complex 2 as a green crystalloid (55.4 mg, 76%). <sup>1</sup>H NMR (d<sub>8</sub>-THF, 400 MHz, ppm, -60 °C): 82.1 (s, 2H, CH<sub>2</sub>), 62.1 (s, 2H, CH<sub>2</sub>), 40.8 (s, 2H, CH<sub>2</sub>), 19.2 (s, 6H, CH(CH<sub>3</sub>)<sub>2</sub>), 18.6 (s, 2H, CH<sub>2</sub>), 8.5 (s, 6H, CH(CH<sub>3</sub>)<sub>2</sub>), 5.5 (s, 6H, CH(CH<sub>3</sub>)<sub>2</sub>), 5.2 (s, 6H, CH(CH<sub>3</sub>)<sub>2</sub>), -2.9 (s, 6H, N(CH<sub>3</sub>)<sub>2</sub>), -19.7 (s, 2H, CH(CH<sub>3</sub>)<sub>2</sub>), -62.1 (s, 2H, CH(CH<sub>3</sub>)<sub>2</sub>), -76.3 (s, 6H, N(CH<sub>3</sub>)<sub>2</sub>). <sup>31</sup>P{<sup>1</sup>H} NMR (d<sub>8</sub>-THF, 162 MHz, ppm): no signal was not observed in the range of +1000 ~ -1000 ppm. Anal. Calcd (%) for C<sub>40</sub>H<sub>96</sub>N<sub>20</sub>P<sub>4</sub>U<sub>2</sub>: C, 32.97; H, 6.64; N, 19.22. Found: C, 32.80; H, 6.56; N, 19.08. FT-IR ν/cm<sup>-1</sup> (KBr): 2964 (w), 2869 (w), 2824 (w), 2770 (w), 2134 (w, bridged N<sub>3</sub><sup>-</sup>), 2079 (s, terminal N<sub>3</sub><sup>-</sup>), 1466 (w), 1362 (w), 1280 (w), 1236 (w), 1128 (w), 1024 (w), 933 (w), 875 (w), 770 (w), 699 (w), 645 (w), 600 (w), 523 (w).

### Synthesis of complex 4

*Method A:* Complex 2 (72.9 mg, 0.1 mmol) and KC<sub>8</sub> (27.2 mg, 0.2 mmol) were added to a 5 mL flask and dissolved in THF (2 mL). The mixture was stirred at RT for 6 h and then the solvent was removed under reduced pressure and the residue was extracted with ether (3 mL). The filtrate was dried to afford complex 4 as a pure brownish solid (44.2 mg, 67%). *Method B:* Complex 3 (145.7 mg, 0.1 mmol) and KC<sub>8</sub> (54.4 mg, 0.4 mmol) were added to a 5 mL flask and dissolved in THF (3 mL). The mixture was stirred at RT for 6 h and then the solvent was removed under reduced pressure and the residue was extracted with ether (3 mL). The filtrate was dried to afford complex 6 as a pure brownish solid (85.8 mg, 65%). Crystal of 4 compatible for X-ray diffraction were grown from a saturated solution in ether (2 mL) stored at RT for one day. <sup>1</sup>H NMR (d<sub>8</sub>-THF, 400 MHz, ppm, RT): 7.6 (s, 12H, CH(CH<sub>3</sub>)<sub>2</sub>), -10.2 (s, 8H, CH<sub>2</sub>), -16.6 (s, 12H, CH(CH<sub>3</sub>)<sub>2</sub>), -26.5 (s, 4H, CH(CH<sub>3</sub>)<sub>2</sub>), -30.1 (s, 12H, N(CH<sub>3</sub>)<sub>2</sub>). <sup>31</sup>P{<sup>1</sup>H} NMR (d<sub>8</sub>-THF, 162 MHz, ppm): no signal was not observed in the range of +1000 ~ -1000 ppm. Anal. Calcd (%) for C<sub>40</sub>H<sub>96</sub>N<sub>10</sub>P<sub>4</sub>U<sub>2</sub>: C, 36.47; H, 7.35; N, 10.63. Found: C, 36.67; H, 7.13; N, 10.54.

## 2. Supporting Figures

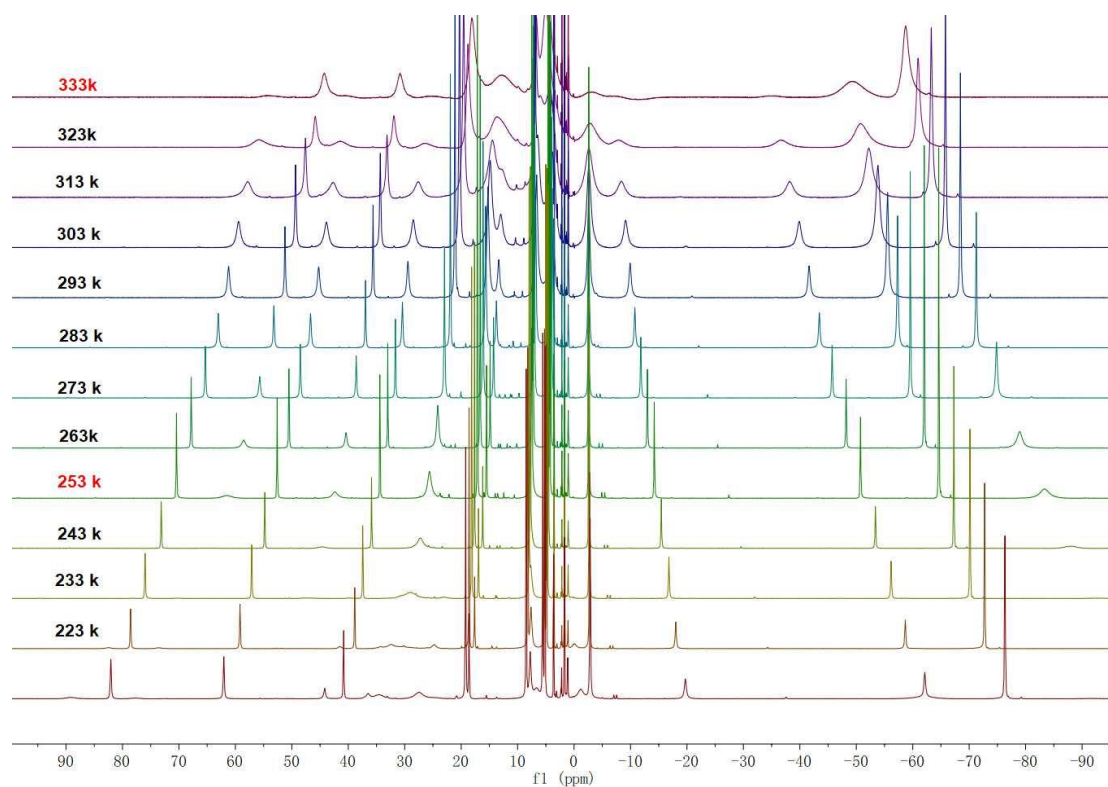

**Figure S1.** Variable-temperature  $^1\text{H}$  NMR spectrum (from 333 K to 213 K) of complex **2** in  $d_8$ -THF.

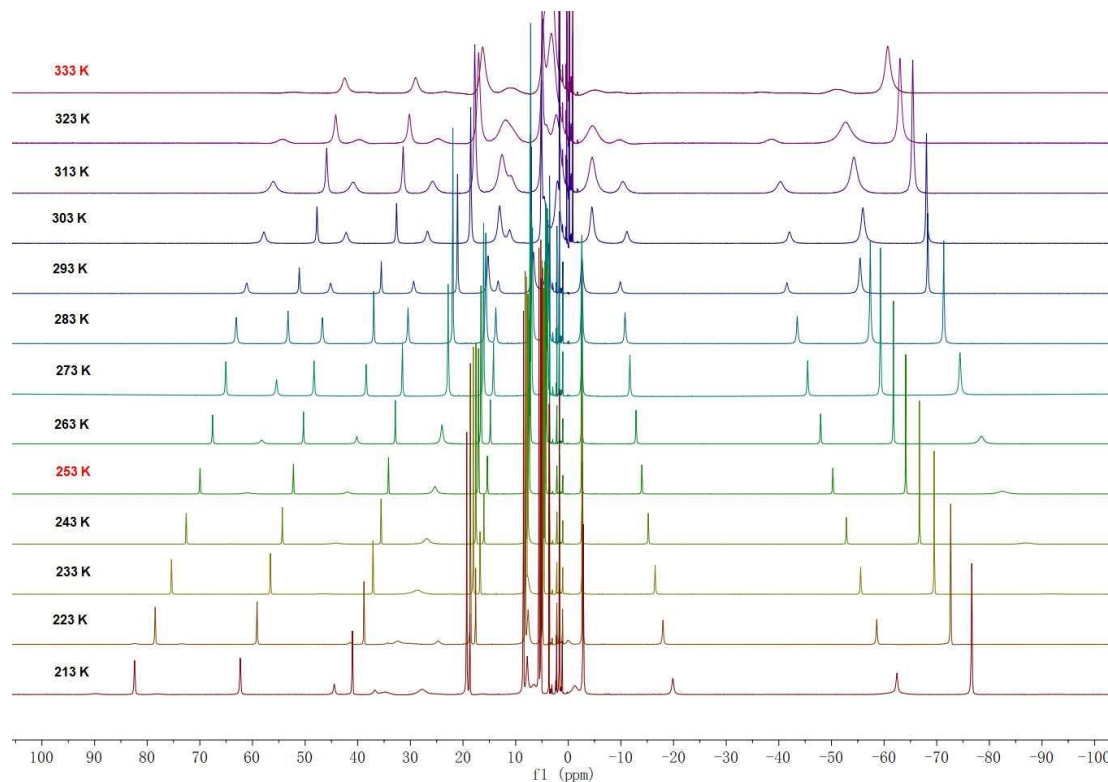

**Figure S2.** Variable-temperature  $^1\text{H}$  NMR spectrum (from 213 K to 333 K) of complex **3** in  $d_8$ -THF.

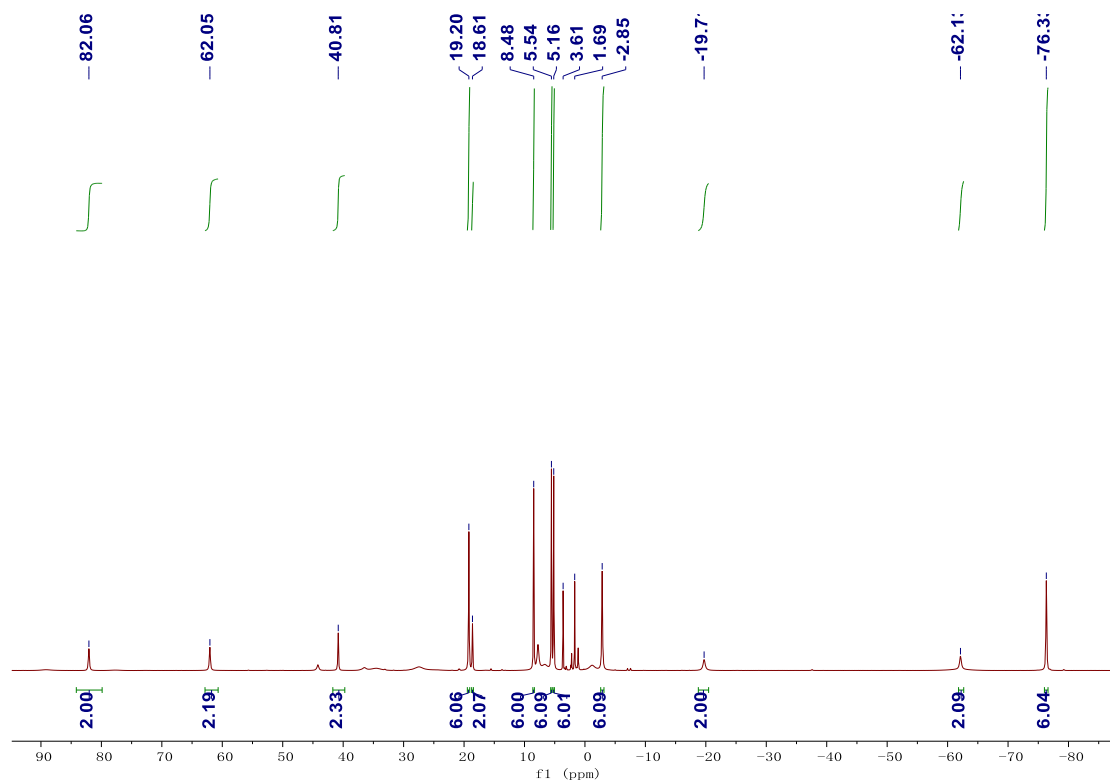

**Figure S3.**  $^1\text{H}$  NMR spectrum of complex **3** in  $\text{d}_8\text{-THF}$  at 213 K.

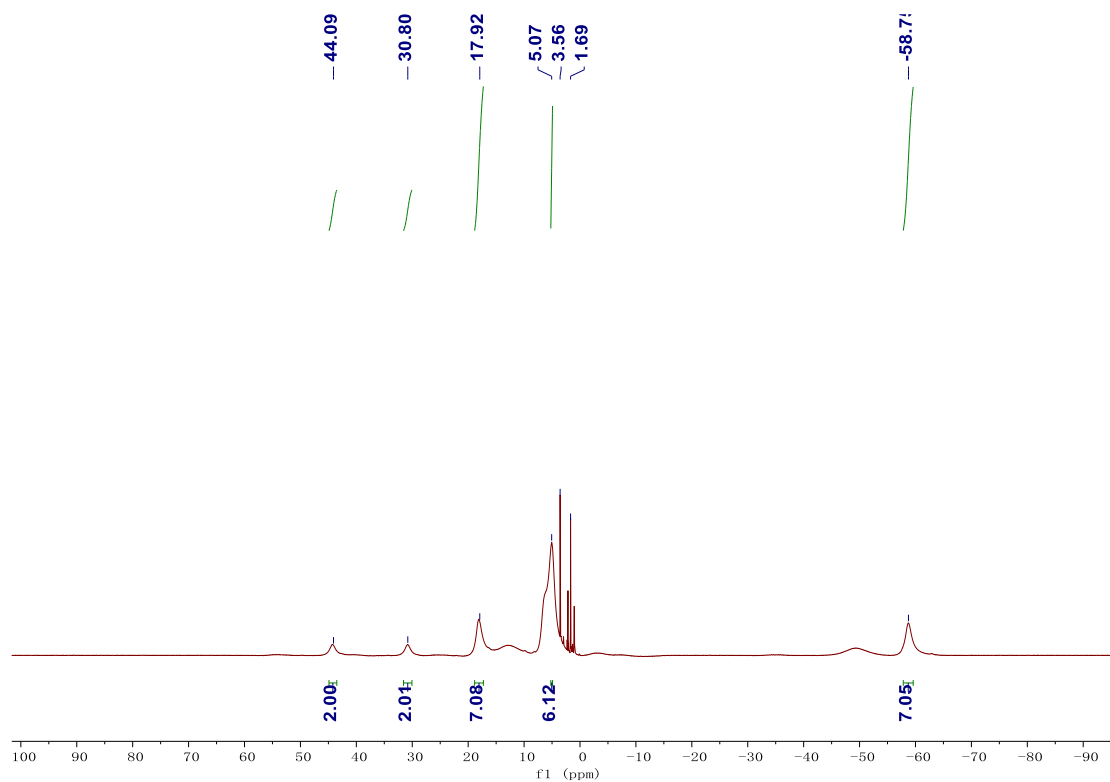

**Figure S4.**  $^1\text{H}$  NMR spectrum of complex **2** in  $\text{d}_8\text{-THF}$  at 333 K.

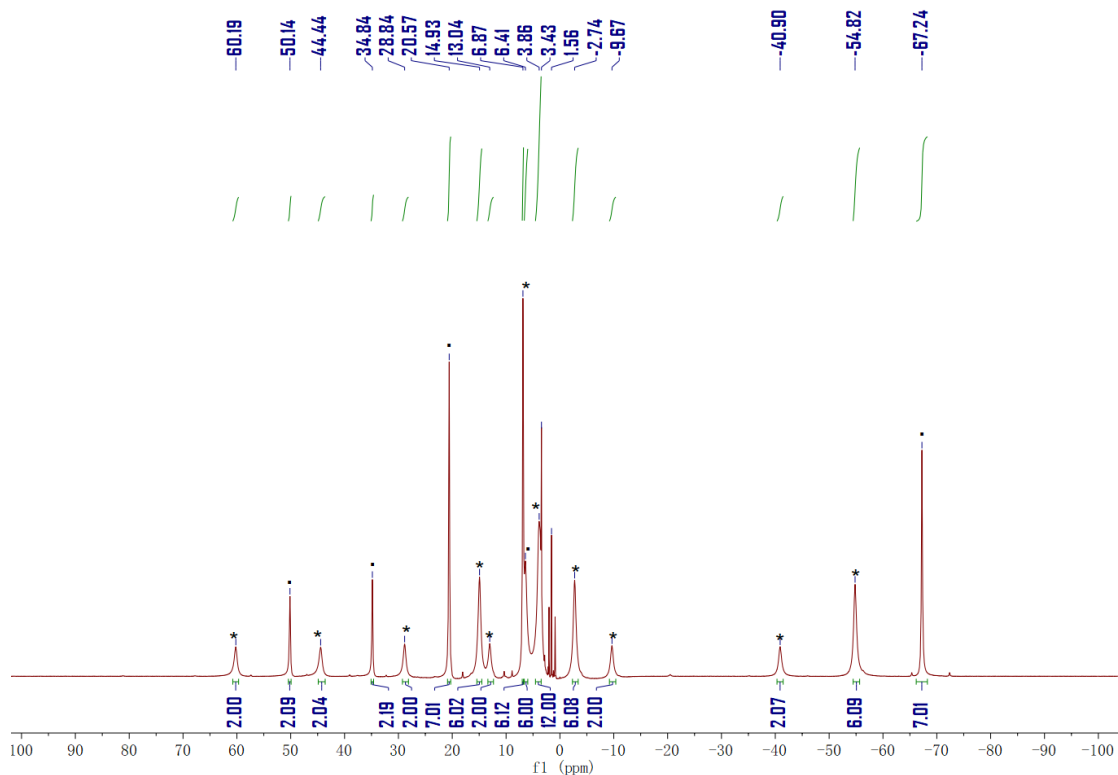

**Figure S5.**  $^1\text{H}$  NMR spectrum (293 K) of complex **2** in  $d_8$ -THF ( $\cdot$  complex **2**; \* complex **3**). The ratio of **2**:**3** = 1:1).

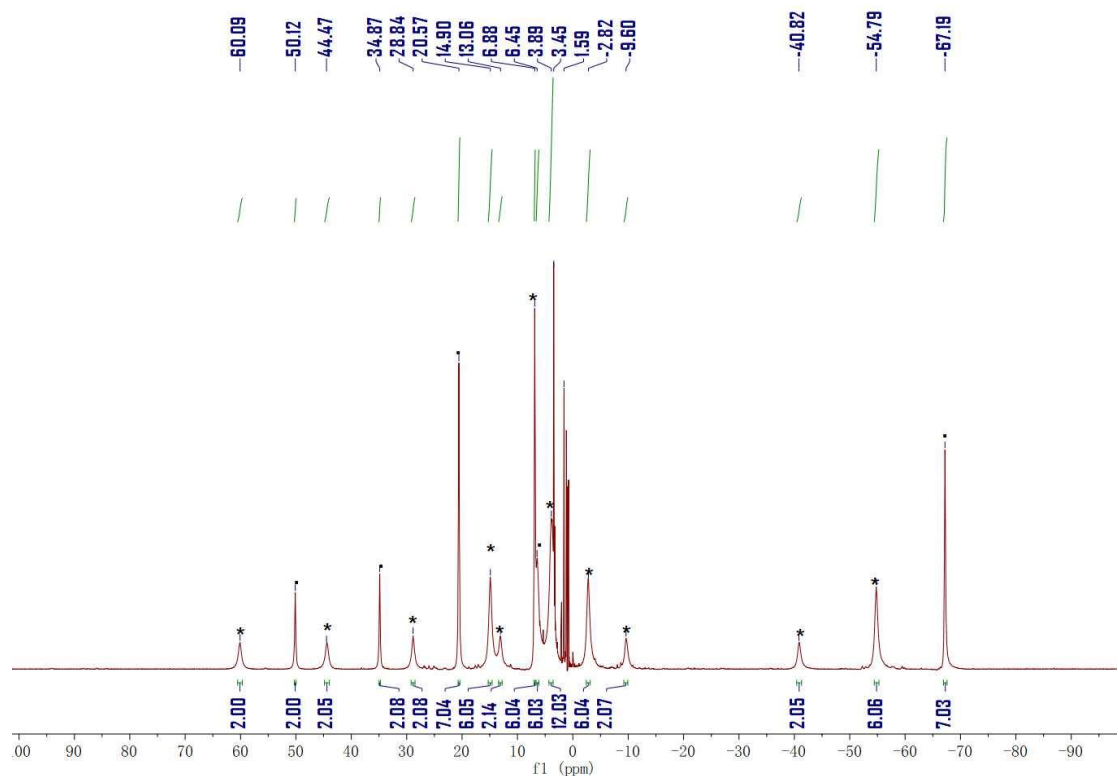

**Figure S6.**  $^1\text{H}$  NMR spectrum (293 K) of complex **3** in  $d_8$ -THF ( $\cdot$  complex **2**; \* complex **3**). The ratio of **2**:**3** = 1:1).

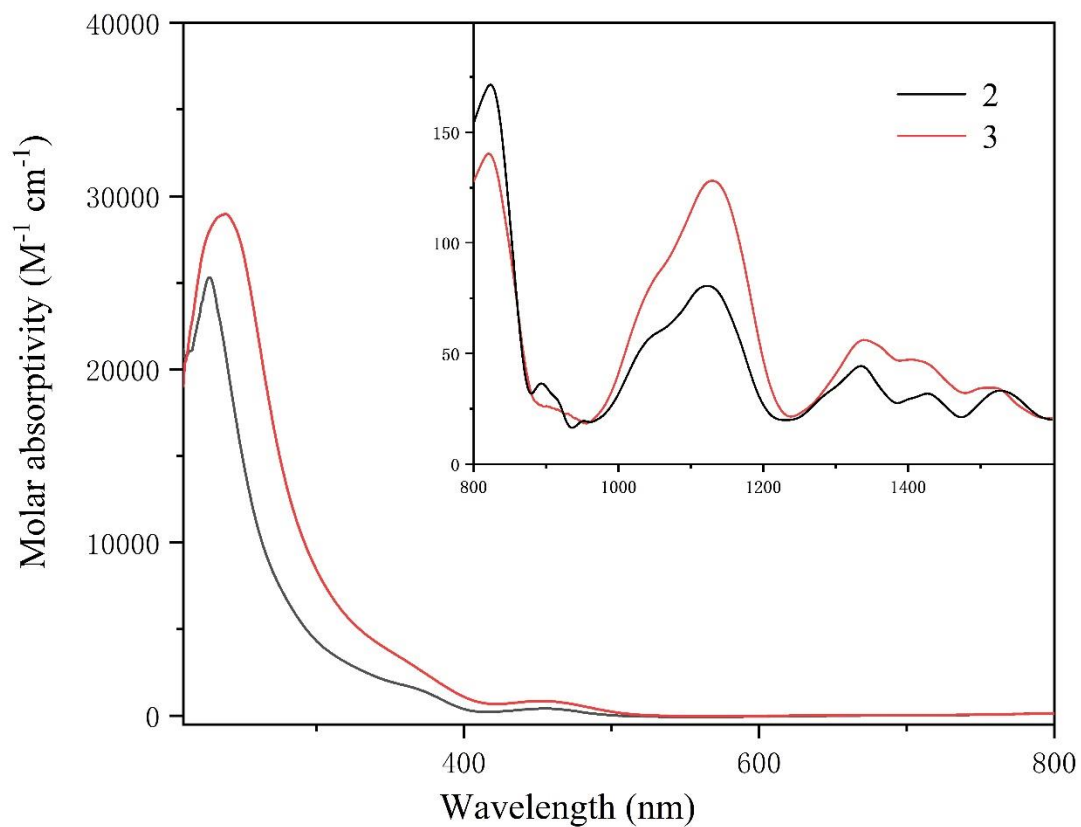

**Figure S7** UV-visible absorption spectra of **2** and **3** measured in THF at RT (inset: near infrared absorption spectra).

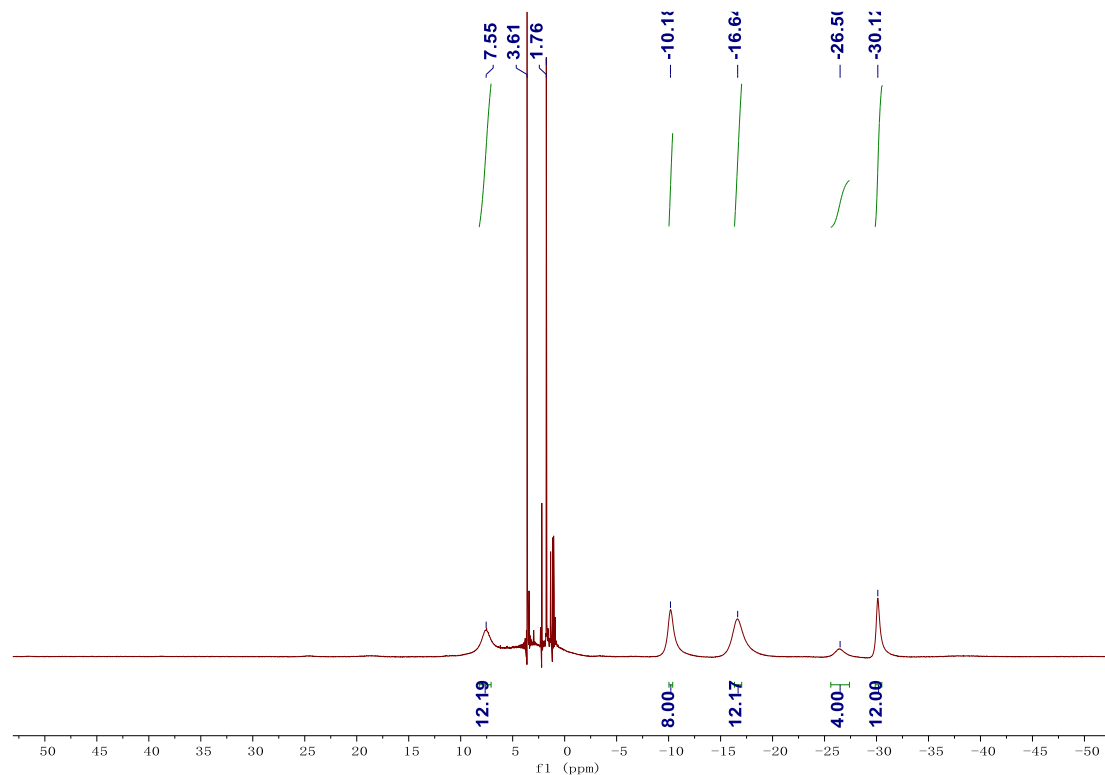

**Figure S8.**  $^1\text{H}$  NMR spectrum of complex **4** in  $\text{d}_8\text{-THF}$  at RT.

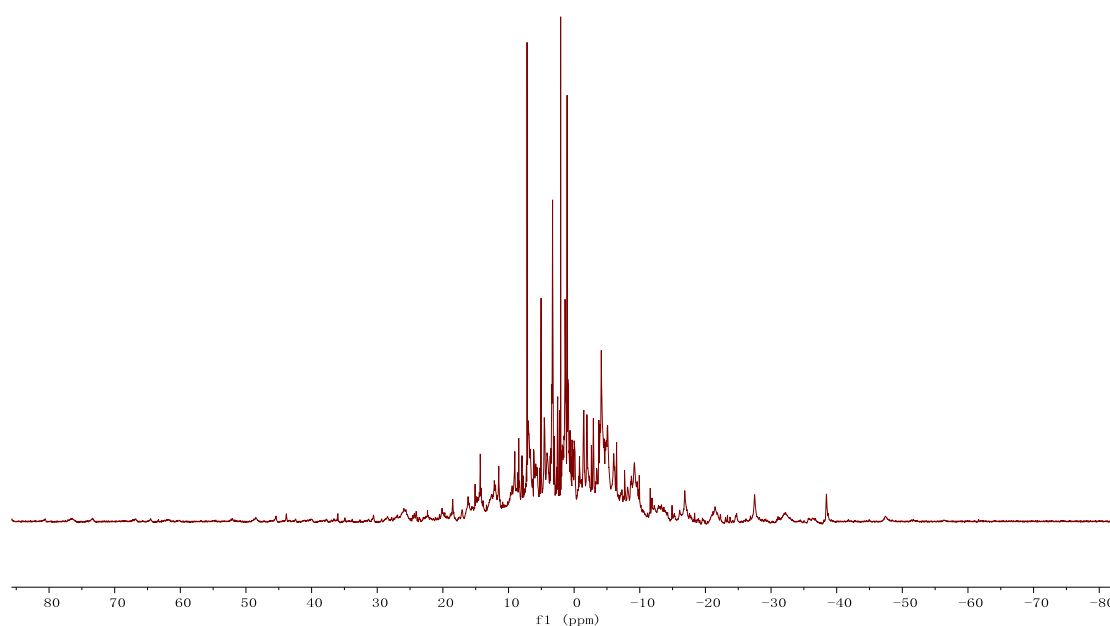

**Figure S9.** *In situ*  $^1\text{H}$  NMR of complex **2** using a 40W UV lamp for 10 h.

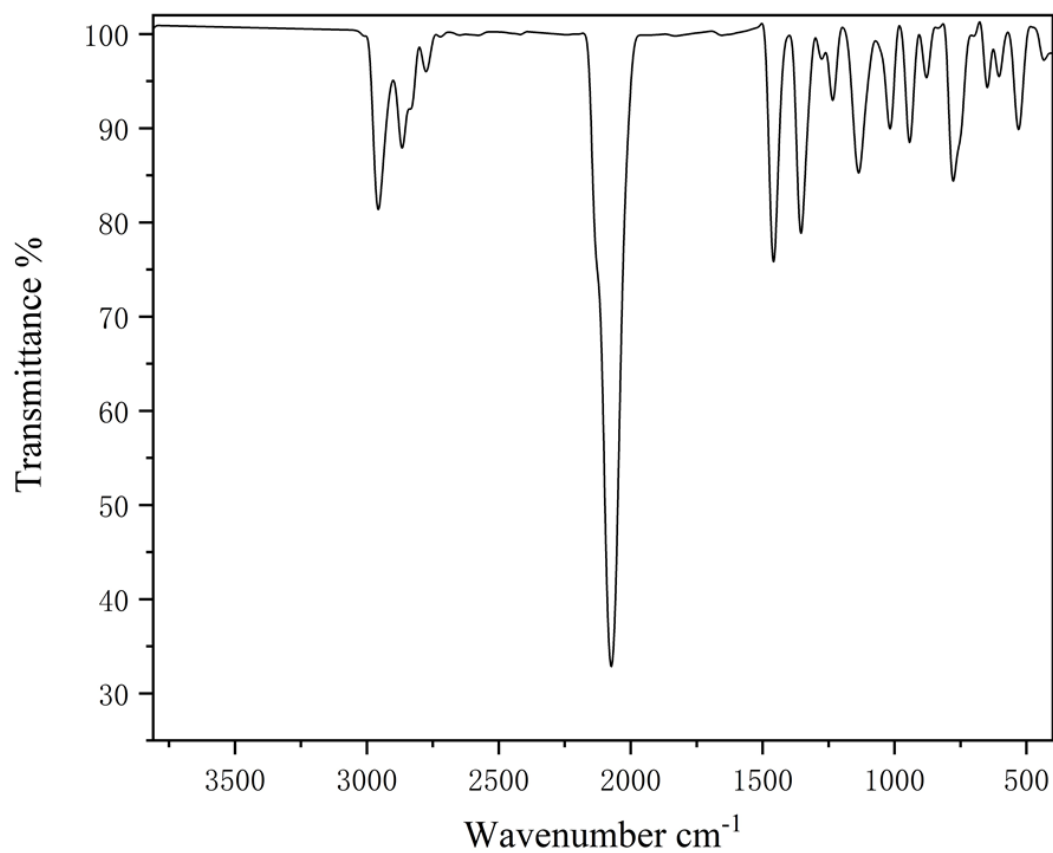

**Figure S10.** FT-IR spectrum of complex **2** measured as solid in a KBr pellet at RT.



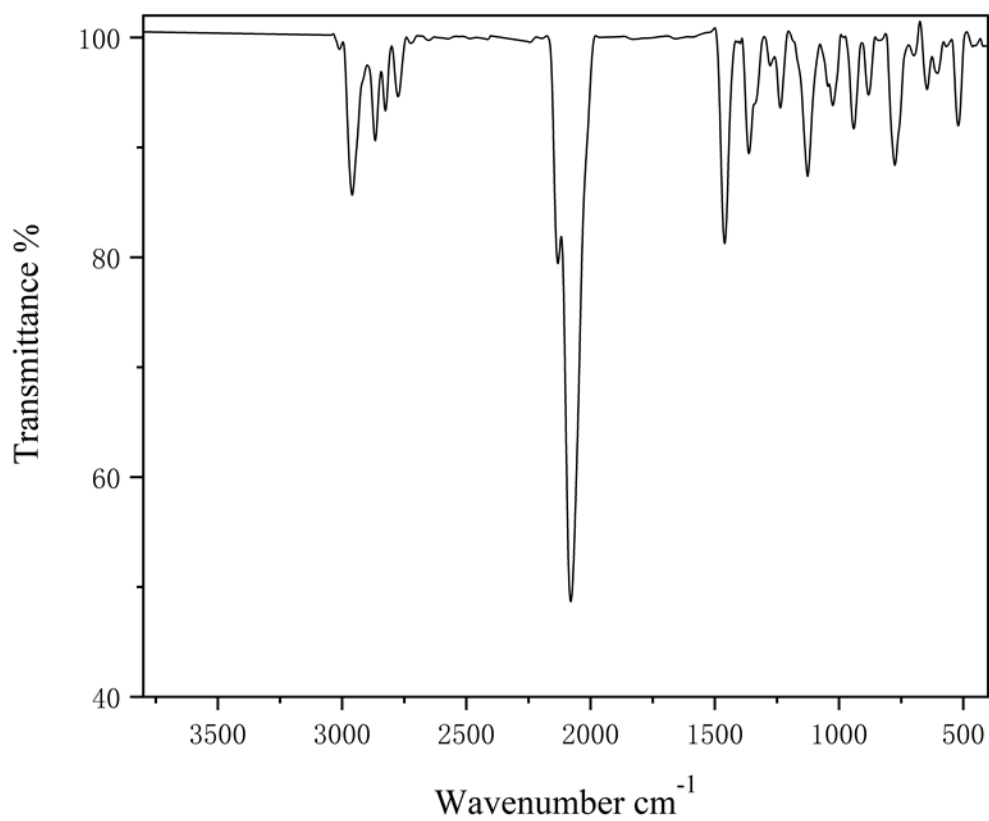

**Figure S11.** FT-IR spectrum of complex **3** measured as solid in a KBr pellet at RT.

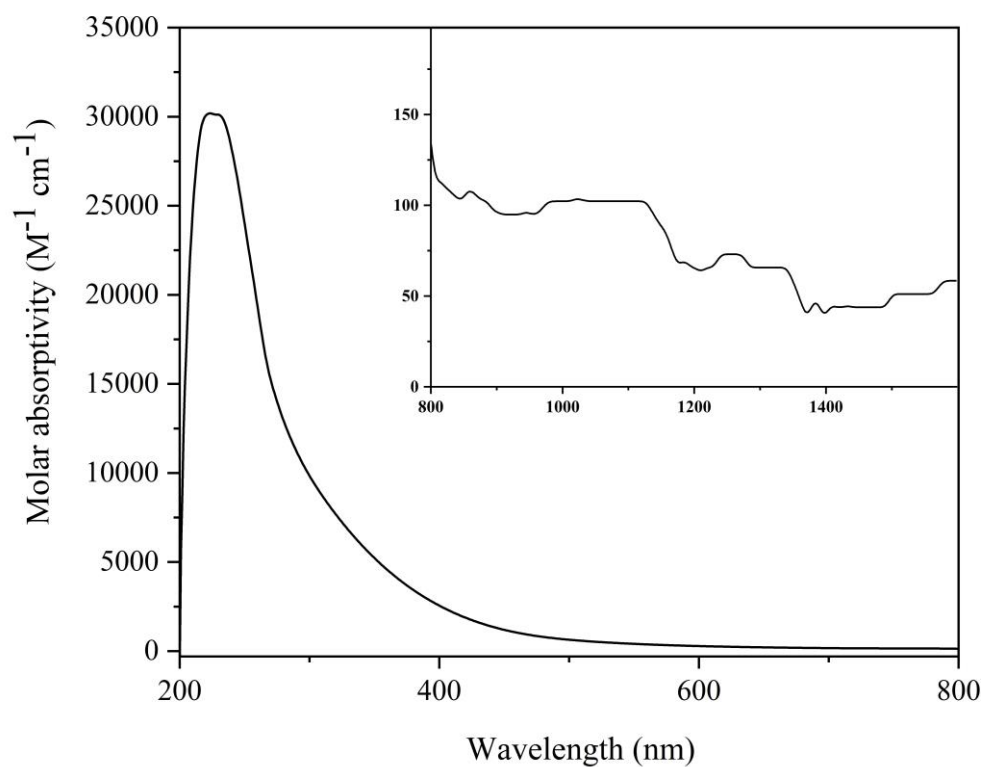

**Figure S12.** UV-visible absorption spectrum of complex **4** measured in THF at RT (inset: near infrared absorption spectra).

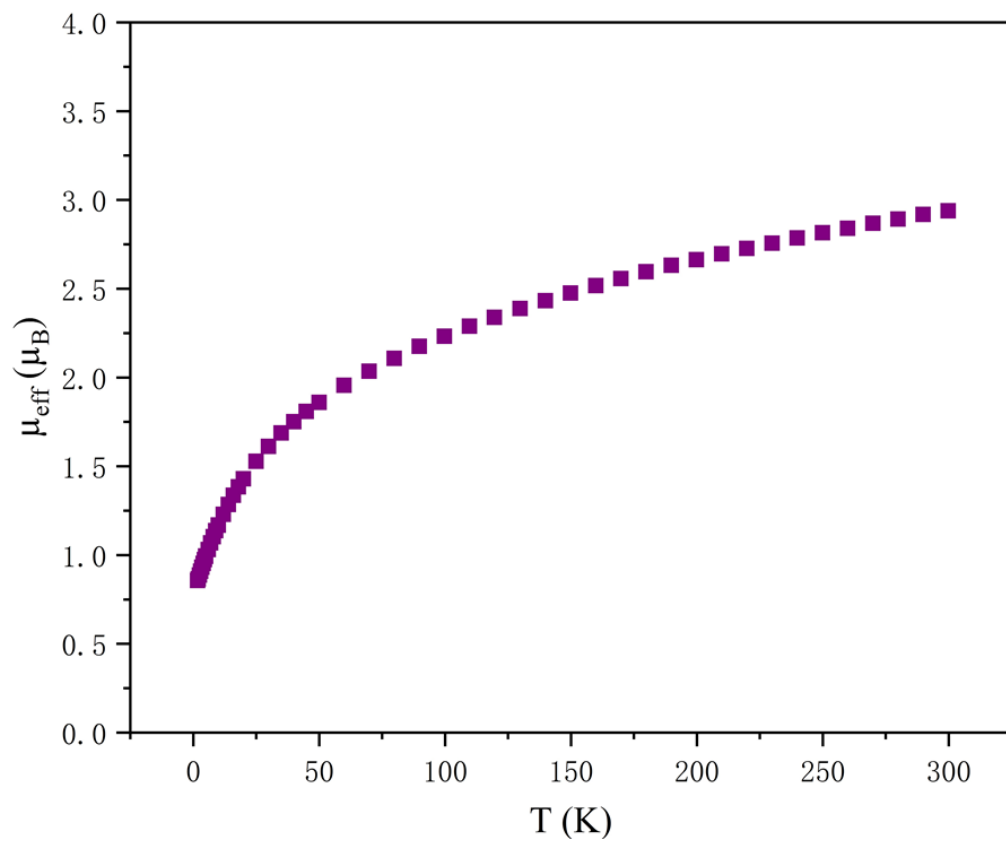

**Figure S13.** Variable-temperature effective magnetic moment data of complex **4** (per uranium).

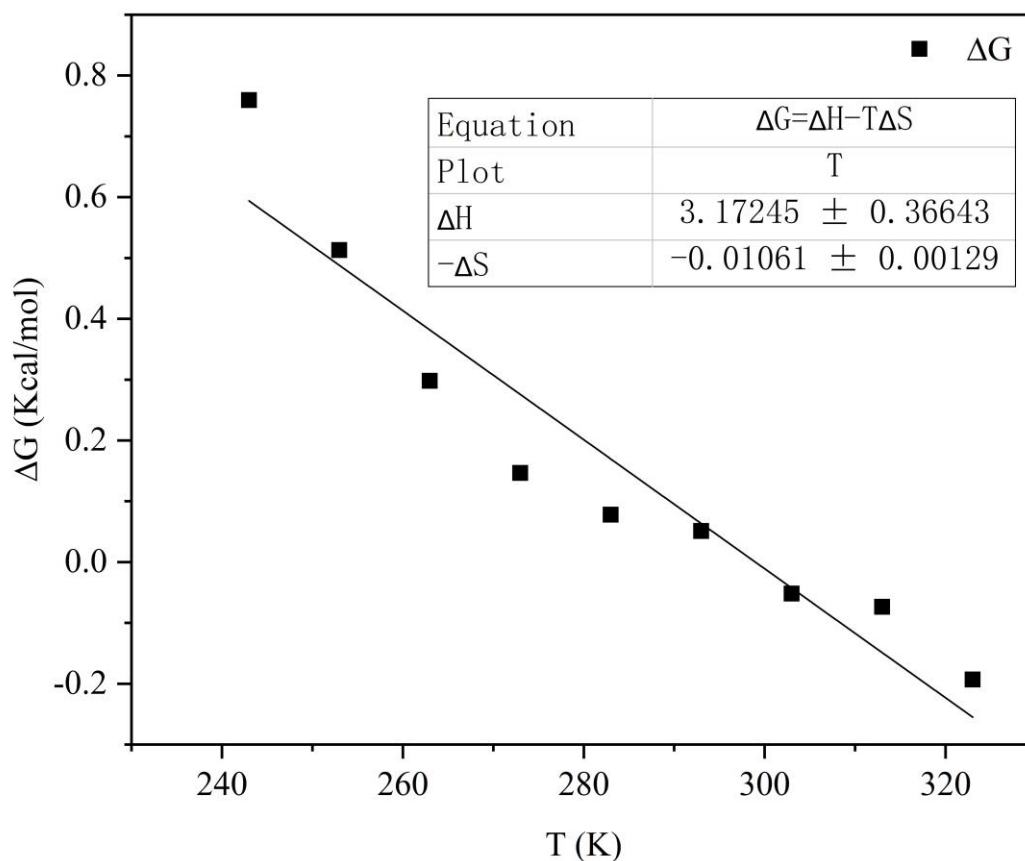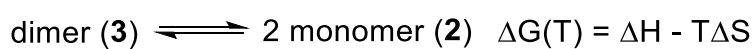

$$p_i = \frac{e^{-\Delta G_i/RT}}{\sum_j e^{-\Delta G_j/RT}}$$

$$p_{dimer} = \frac{e^{-\Delta G_{dimer}/RT}}{e^{-\Delta G_{dimer}/RT} + e^{-\Delta G_{2 \text{ monomer}}/RT}}$$

$$\Delta G_{dimer} = 0, \quad \Delta G_{2 \text{ monomer}} = \Delta G(T)$$

$$p_{dimer} = \frac{e^{-0/RT}}{e^{-0/RT} + e^{-\Delta G(T)/RT}} = \frac{1}{1 + e^{-\Delta G(T)/RT}}$$

$$\Delta G(T) = -RT \ln \left( \frac{1}{p_{dimer}} - 1 \right)$$

**Figure S14.** The thermodynamic properties ( $\Delta H$ ,  $\Delta S$  and  $\Delta G$ ) from variable temperature  $^1\text{H}$  NMR spectra of complex **3**.

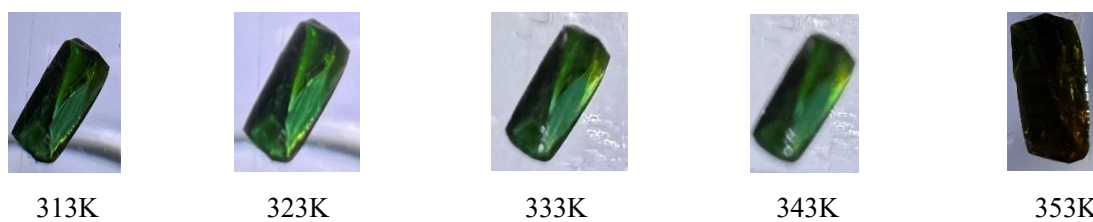

**Figure S15.** A crystal of complex **3** was placed on a diffractometer and photographed at different temperature (313 K to 353 K).

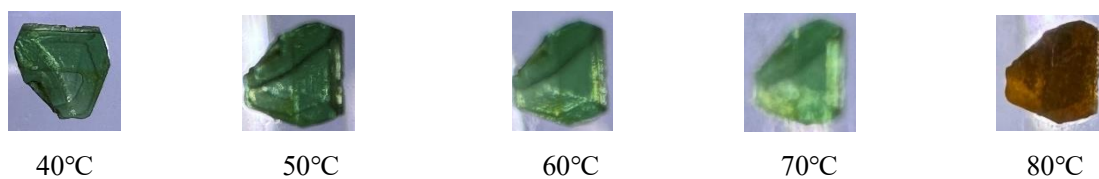

**Figure S16.** A crystal of complex **3** was heated at incremental temperatures (40°C, 50°C, 60°C, 70°C, and 80°C) within a glovebox for 20 minutes, followed by photography at room temperature.

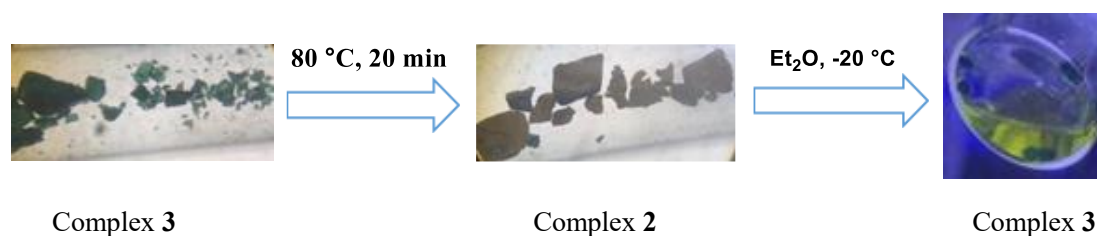

**Figure S17.** The interconversion of complexes **2** and **3** in the crystal and solution states.

### 3. X-ray Crystallographic Analysis

The crystallographic data for complexes **2**, **3**, and **4** were collected on a Bruker D8 venture photon II detectors at 193 K or 296 K with a radiation source of Mo(K $\alpha$ ) ( $\lambda = 0.71073$  Å) using the  $\omega$ -scan technique. Multiscan or empirical absorption corrections (SADABS) were applied.<sup>2</sup> The structures were solved by direct methods, expanded by difference Fourier syntheses, and refined by full-matrix least squares on  $F^2$  using the olex2.<sup>3</sup> All non-hydrogen atoms were refined on  $F^2$  by full-matrix least-squares procedures with the use of anisotropic displacement parameters.<sup>4</sup> Hydrogen atoms were introduced at their geometric positions and refined as riding atoms. Evaluation of the CIF using the CheckCIF routine at [www.checkcif.iucr.org](http://www.checkcif.iucr.org) gave no A or B alert for these complexes. Details of the data collection and refinement are given in Table S1. CCDC-2310068 (**2**), 2310070 (**3**) and 2310069 (**4**) contain the crystallographic data for this paper. These data can be obtained free of charge from The Cambridge Crystallographic Data Centre via [www.ccdc.cam.ac.uk/data-request/cif](http://www.ccdc.cam.ac.uk/data-request/cif).

In addition, to corroborate the process of SCSC transformation, a crystal of complex **3** was placed on a diffractometer and X-ray diffraction data, **3-nK** ( $n = 313, 323, 333, 343$  and  $353$ ), were collected at different temperatures ( $313$  K,  $323$  K,  $333$  K,  $343$  K, and  $353$  K). Details of these data collection and refinement are given in Table S2. Moreover, A crystal of complex **3** was heated at incremental temperatures ( $40$  °C,  $50$  °C,  $60$  °C,  $70$  °C, and  $80$  °C) within a glovebox for 20 minutes, followed by X-ray diffraction data collection at  $193$  K, **3-n °C** ( $n = 40, 50, 60, 70$  and  $80$ ). Details of these data collection and refinement are given in Table S3.

**Table S1.** Crystal data and structure refinements for **2-4**.

| Complex           | <b>2</b>                                                         | <b>3</b>                                                                      | <b>4</b>                                                                      |
|-------------------|------------------------------------------------------------------|-------------------------------------------------------------------------------|-------------------------------------------------------------------------------|
| Formula           | C <sub>20</sub> H <sub>48</sub> N <sub>10</sub> P <sub>2</sub> U | C <sub>40</sub> H <sub>96</sub> N <sub>20</sub> P <sub>4</sub> U <sub>2</sub> | C <sub>40</sub> H <sub>96</sub> N <sub>10</sub> P <sub>4</sub> U <sub>2</sub> |
| <i>Mr</i> [g/mol] | 728.65                                                           | 1457.30                                                                       | 1317.20                                                                       |
| Temp. [K]         | 193.00                                                           | 193.00                                                                        | 296.15                                                                        |

|                                                               |                                                             |                                                             |                                                             |
|---------------------------------------------------------------|-------------------------------------------------------------|-------------------------------------------------------------|-------------------------------------------------------------|
| Crystal system                                                | monoclinic                                                  | orthorhombic                                                | triclinic                                                   |
| Space group                                                   | P2 <sub>1</sub> /n                                          | P2 <sub>1</sub> 2 <sub>1</sub> 2                            | P-1                                                         |
| a[Å]                                                          | 9.909(3)                                                    | 10.5753(13)                                                 | 10.769(3)                                                   |
| b[Å]                                                          | 10.674(3)                                                   | 27.797(3)                                                   | 13.579(3)                                                   |
| c[Å]                                                          | 14.833(5)                                                   | 10.3786(13)                                                 | 20.817(5)                                                   |
| α[°]                                                          | 90                                                          | 90                                                          | 82.853(6)                                                   |
| β[°]                                                          | 104.484(10)                                                 | 90                                                          | 79.684(6)                                                   |
| γ[°]                                                          | 90                                                          | 90                                                          | 69.571(5)                                                   |
| Volume[Å <sup>3</sup> ]                                       | 1519.0(7)                                                   | 3051.0(6)                                                   | 2800.3(12)                                                  |
| Z/D <sub>calcd.</sub> [g/cm <sup>3</sup> ]                    | 2/1.593                                                     | 2/1.586                                                     | 2/1.562                                                     |
| μ[mm <sup>-1</sup> ]                                          | 5.474                                                       | 5.451                                                       | 5.925                                                       |
| F(000)                                                        | 720.0                                                       | 1440.0                                                      | 1300.0                                                      |
| θ range/deg                                                   | 4.754 - 55.008                                              | 4.12 - 54.968                                               | 3.662 - 49.998                                              |
|                                                               | -12 ≤ h ≤ 12                                                | -10 ≤ h ≤ 13                                                | -12 ≤ h ≤ 12                                                |
| Index ranges                                                  | -13 ≤ k ≤ 13                                                | -36 ≤ k ≤ 35                                                | -16 ≤ k ≤ 16                                                |
|                                                               | -19 ≤ l ≤ 19                                                | -13 ≤ l ≤ 13                                                | -20 ≤ l ≤ 24                                                |
| Collected data                                                | 46664                                                       | 28362                                                       | 15512                                                       |
|                                                               | 3476                                                        | 6999                                                        | 9727                                                        |
| Unique data                                                   | [R <sub>int</sub> = 0.0671,<br>R <sub>sigma</sub> = 0.0259] | [R <sub>int</sub> = 0.1091,<br>R <sub>sigma</sub> = 0.0955] | [R <sub>int</sub> = 0.0523,<br>R <sub>sigma</sub> = 0.0979] |
| Completeness                                                  | 99%                                                         | 99%                                                         | 99%                                                         |
| Data/parameters                                               | 3476/0/157                                                  | 6999/0/312                                                  | 9727/0/529                                                  |
| GOF on F <sup>2</sup>                                         | 1.062                                                       | 1.015                                                       | 1.033                                                       |
| Final R indices [I>2<br>σ(I)]                                 | R <sub>1</sub> = 0.0170<br>wR <sub>2</sub> = 0.0369         | R <sub>1</sub> = 0.0467<br>wR <sub>2</sub> = 0.0860         | R <sub>1</sub> = 0.0526<br>wR <sub>2</sub> = 0.1060         |
| Final R indices [all<br>data]                                 | R <sub>1</sub> = 0.0256<br>wR <sub>2</sub> = 0.0388         | R <sub>1</sub> = 0.0689<br>wR <sub>2</sub> = 0.0958         | R <sub>1</sub> = 0.0951<br>wR <sub>2</sub> = 0.1208         |
| Largest diff.<br>peak/hole (e <sup>-</sup> ·Å <sup>-3</sup> ) | 0.37/-0.81                                                  | 0.94/-1.30                                                  | 2.39/-1.55                                                  |
| CCDC                                                          | 2310068                                                     | 2310070                                                     | 2310069                                                     |

**Table S2.** Crystal data and structure refinements for **3** at different temperature (K).

| Complex                                            | 3-313 K                                                                         | 3-323 K                                                                         | 3-333 K                                                                         | 3-343 K                                                                         | 3-353 K                                                                         |
|----------------------------------------------------|---------------------------------------------------------------------------------|---------------------------------------------------------------------------------|---------------------------------------------------------------------------------|---------------------------------------------------------------------------------|---------------------------------------------------------------------------------|
| Formula                                            | C <sub>40</sub> H <sub>96</sub> N <sub>20</sub> P <sub>4</sub> U <sub>2</sub>   | C <sub>40</sub> H <sub>96</sub> N <sub>20</sub> P <sub>4</sub> U <sub>2</sub>   | C <sub>40</sub> H <sub>96</sub> N <sub>20</sub> P <sub>4</sub> U <sub>2</sub>   | C <sub>20</sub> H <sub>48</sub> N <sub>10</sub> P <sub>2</sub> U                | C <sub>20</sub> H <sub>48</sub> N <sub>10</sub> P <sub>2</sub> U                |
| <i>Mr</i> [g/mol]                                  | 1457.30                                                                         | 1457.30                                                                         | 1457.30                                                                         | 728.65                                                                          | 728.65                                                                          |
| Temp. [K]                                          | 313.00                                                                          | 323.00                                                                          | 333.00                                                                          | 343.00                                                                          | 353.00                                                                          |
| Crystal system                                     | monoclinic                                                                      | monoclinic                                                                      | monoclinic                                                                      | monoclinic                                                                      | monoclinic                                                                      |
| Space group                                        | C2/c                                                                            | C2/c                                                                            | C2/c                                                                            | C2/c                                                                            | P2 <sub>1</sub> /n                                                              |
| <i>a</i> [Å]                                       | 25.240(4)                                                                       | 25.206(6)                                                                       | 25.279(2)                                                                       | 25.309(2)                                                                       | 10.1931(14)                                                                     |
| <i>b</i> [Å]                                       | 10.392(2)                                                                       | 10.392(2)                                                                       | 10.4213(10)                                                                     | 10.4218(8)                                                                      | 10.6719(10)                                                                     |
| <i>c</i> [Å]                                       | 25.465(5)                                                                       | 25.457(6)                                                                       | 25.477(3)                                                                       | 25.538(2)                                                                       | 14.9477(17)                                                                     |
| $\alpha$ [°]                                       | 90                                                                              | 90                                                                              | 90                                                                              | 90                                                                              | 90                                                                              |
| $\beta$ [°]                                        | 110.915(6)                                                                      | 110.647(7)                                                                      | 110.786(3)                                                                      | 110.799(3)                                                                      | 102.736(4)                                                                      |
| $\gamma$ [°]                                       | 90                                                                              | 90                                                                              | 90                                                                              | 90                                                                              | 90                                                                              |
| Volume[Å <sup>3</sup> ]                            | 6239(2)                                                                         | 6240(2)                                                                         | 6274.9(11)                                                                      | 6297.0(9)                                                                       | 1586.0(3)                                                                       |
| Z/ <i>D</i> <sub>calcd.</sub> [g/cm <sup>3</sup> ] | 4/1.432                                                                         | 4/1.551                                                                         | 4/1.543                                                                         | 8/1.537                                                                         | 2/1.526                                                                         |
| $\mu$ [mm <sup>-1</sup> ]                          | 5.331                                                                           | 5.330                                                                           | 5.301                                                                           | 5.282                                                                           | 5.243                                                                           |
| F(000)                                             | 2880.0                                                                          | 2880.0                                                                          | 2880.0                                                                          | 2880.0                                                                          | 720.0                                                                           |
| $\theta$ range/deg                                 | 3.9-55.296                                                                      | 4.284-50.7                                                                      | 4.368-55.062                                                                    | 4.27-50.054                                                                     | 5.842-56.644                                                                    |
|                                                    | -32 ≤ <i>h</i> ≤ 32                                                             | -28 ≤ <i>h</i> ≤ 30                                                             | -32 ≤ <i>h</i> ≤ 32                                                             | -30 ≤ <i>h</i> ≤ 26                                                             | -13 ≤ <i>h</i> ≤ 11                                                             |
| Index ranges                                       | -13 ≤ <i>k</i> ≤ 10                                                             | -12 ≤ <i>k</i> ≤ 12                                                             | -13 ≤ <i>k</i> ≤ 11                                                             | -12 ≤ <i>k</i> ≤ 12                                                             | -11 ≤ <i>k</i> ≤ 14                                                             |
|                                                    | -32 ≤ <i>l</i> ≤ 33                                                             | -30 ≤ <i>l</i> ≤ 30                                                             | -33 ≤ <i>l</i> ≤ 32                                                             | -30 ≤ <i>l</i> ≤ 30                                                             | -19 ≤ <i>l</i> ≤ 12                                                             |
| Collected data                                     | 23910                                                                           | 24223                                                                           | 28222                                                                           | 18716                                                                           | 7496                                                                            |
| Unique data                                        | 7215<br>[ <i>R</i> <sub>int</sub> =0.0883<br><i>R</i> <sub>sigma</sub> =0.0931] | 5723<br>[ <i>R</i> <sub>int</sub> =0.0979<br><i>R</i> <sub>sigma</sub> =0.0860] | 7206<br>[ <i>R</i> <sub>int</sub> =0.0633<br><i>R</i> <sub>sigma</sub> =0.0545] | 5563<br>[ <i>R</i> <sub>int</sub> =0.0961<br><i>R</i> <sub>sigma</sub> =0.1070] | 3940<br>[ <i>R</i> <sub>int</sub> =0.0714<br><i>R</i> <sub>sigma</sub> =0.0819] |
| Completeness                                       | 100%                                                                            | 100%                                                                            | 100%                                                                            | 100%                                                                            | 100%                                                                            |
| Data/parameters                                    | 7215/108/370                                                                    | 5723/194/370                                                                    | 7206/141/370                                                                    | 5563/462/370                                                                    | 3940/1/157                                                                      |
| GOF on F <sup>2</sup>                              | 1.026                                                                           | 1.008                                                                           | 1.012                                                                           | 1.055                                                                           | 0.906                                                                           |
| Final R indices<br>[ <i>I</i> >2σ( <i>I</i> )]     | <i>R</i> <sub>1</sub> = 0.0558<br><i>wR</i> <sub>2</sub> = 0.0980               | <i>R</i> <sub>1</sub> = 0.0530<br><i>wR</i> <sub>2</sub> = 0.0910               | <i>R</i> <sub>1</sub> = 0.0453<br><i>wR</i> <sub>2</sub> = 0.0930               | <i>R</i> <sub>1</sub> = 0.0729<br><i>wR</i> <sub>2</sub> = 0.0991               | <i>R</i> <sub>1</sub> = 0.0455<br><i>wR</i> <sub>2</sub> = 0.1032               |
| Final R indices<br>[all data]                      | <i>R</i> <sub>1</sub> = 0.1364<br><i>wR</i> <sub>2</sub> = 0.1252               | <i>R</i> <sub>1</sub> = 0.1156<br><i>wR</i> <sub>2</sub> = 0.1131               | <i>R</i> <sub>1</sub> = 0.0924<br><i>wR</i> <sub>2</sub> = 0.1133               | <i>R</i> <sub>1</sub> = 0.1613<br><i>wR</i> <sub>2</sub> = 0.1281               | <i>R</i> <sub>1</sub> = 0.1059<br><i>wR</i> <sub>2</sub> = 0.1270               |
| Largest diff.<br>peak/hole (e·Å <sup>-3</sup> )    | 1.50/-0.84                                                                      | 0.77/-0.81                                                                      | 1.85/-1.14                                                                      | 0.70/-0.91                                                                      | 1.23/-0.88                                                                      |
| CCDC                                               | 2329971                                                                         | 2329972                                                                         | 2329973                                                                         | 2329974                                                                         | 2329975                                                                         |

**Table S3.** Crystal data and structure refinements for **3**.<sup>a</sup>

| Complex           | 3-40 °C                                                                        | 3-50 °C                                                                       | 3-60 °C                                                                       | 3-70 °C                                                                       | 3-80 °C                                                          |
|-------------------|--------------------------------------------------------------------------------|-------------------------------------------------------------------------------|-------------------------------------------------------------------------------|-------------------------------------------------------------------------------|------------------------------------------------------------------|
| Formula           | C <sub>80</sub> H <sub>192</sub> N <sub>40</sub> P <sub>8</sub> U <sub>4</sub> | C <sub>40</sub> H <sub>96</sub> N <sub>20</sub> P <sub>4</sub> U <sub>2</sub> | C <sub>40</sub> H <sub>96</sub> N <sub>20</sub> P <sub>4</sub> U <sub>2</sub> | C <sub>40</sub> H <sub>96</sub> N <sub>20</sub> P <sub>4</sub> U <sub>2</sub> | C <sub>20</sub> H <sub>48</sub> N <sub>10</sub> P <sub>2</sub> U |
| <i>Mr</i> [g/mol] | 2914.60                                                                        | 1457.30                                                                       | 1457.30                                                                       | 1457.30                                                                       | 728.65                                                           |
| Temp. [K]         | 193.00                                                                         | 193.00                                                                        | 193.00                                                                        | 193.00                                                                        | 193.00                                                           |
| Crystal system    | monoclinic                                                                     | orthorhombic                                                                  | orthorhombic                                                                  | monoclinic                                                                    | monoclinic                                                       |
| Space group       | P2 <sub>1</sub> /n                                                             | P2 <sub>1</sub> 2 <sub>1</sub> 2                                              | P2 <sub>1</sub> 2 <sub>1</sub> 2                                              | P2 <sub>1</sub> /n                                                            | P2 <sub>1</sub> /n                                               |

|                                                 |                                                                   |                                                                  |                                                                  |                                                                   |                                                                  |
|-------------------------------------------------|-------------------------------------------------------------------|------------------------------------------------------------------|------------------------------------------------------------------|-------------------------------------------------------------------|------------------------------------------------------------------|
| $a$ [Å]                                         | 24.9458(11)                                                       | 10.5761(6)                                                       | 10.5757(4)                                                       | 24.9421(16)                                                       | 9.8845(5)                                                        |
| $b$ [Å]                                         | 10.2858(5)                                                        | 27.7942(16)                                                      | 27.8005(13)                                                      | 10.2665(7)                                                        | 10.6539(6)                                                       |
| $c$ [Å]                                         | 25.3172(12)                                                       | 10.3688(6)                                                       | 10.3708(4)                                                       | 25.3542(19)                                                       | 14.7678(9)                                                       |
| $\alpha$ [°]                                    | 90                                                                | 90                                                               | 90                                                               | 90                                                                | 90                                                               |
| $\beta$ [°]                                     | 111.1580(10)                                                      | 90                                                               | 90                                                               | 111.169(2)                                                        | 104.838(2)                                                       |
| $\gamma$ [°]                                    | 90                                                                | 90                                                               | 90                                                               | 90                                                                | 90                                                               |
| Volume[Å <sup>3</sup> ]                         | 6058.2(5)                                                         | 3048.0(3)                                                        | 3049.1(2)                                                        | 6054.3(7)                                                         | 1503.31(15)                                                      |
| $Z/D_{\text{calcd.}}$ [g/cm <sup>3</sup> ]      | 2/1.598                                                           | 2/1.588                                                          | 2/1.587                                                          | 4/1.599                                                           | 2/1.610                                                          |
| $\mu$ [mm <sup>-1</sup> ]                       | 5.490                                                             | 5.456                                                            | 5.454                                                            | 5.494                                                             | 5.531                                                            |
| $F(000)$                                        | 2880.0                                                            | 1440.0                                                           | 1440.0                                                           | 2880.0                                                            | 720.0                                                            |
| $\theta$ range/deg                              | 3.93-55.146                                                       | 4.84-50.742                                                      | 3.928-50.72                                                      | 3.968-55.052                                                      | 5.706-50.952                                                     |
|                                                 | -32 ≤ $h$ ≤ 32                                                    | -12 ≤ $h$ ≤ 12                                                   | -12 ≤ $h$ ≤ 12                                                   | -32 ≤ $h$ ≤ 32                                                    | -11 ≤ $h$ ≤ 11                                                   |
| Index ranges                                    | -13 ≤ $k$ ≤ 10                                                    | -33 ≤ $k$ ≤ 33                                                   | -27 ≤ $k$ ≤ 33                                                   | -13 ≤ $k$ ≤ 13                                                    | -12 ≤ $k$ ≤ 12                                                   |
|                                                 | -24 ≤ $l$ ≤ 32                                                    | -12 ≤ $l$ ≤ 11                                                   | -12 ≤ $l$ ≤ 12                                                   | -22 ≤ $l$ ≤ 32                                                    | -17 ≤ $l$ ≤ 13                                                   |
| Collected data                                  | 55348                                                             | 24118                                                            | 24195                                                            | 42756                                                             | 11019                                                            |
| Unique data                                     | 13966<br>[ $R_{\text{int}}=0.0845$<br>$R_{\text{sigma}}=0.0757$ ] | 5570<br>[ $R_{\text{int}}=0.0437$<br>$R_{\text{sigma}}=0.0426$ ] | 5586<br>[ $R_{\text{int}}=0.0604$<br>$R_{\text{sigma}}=0.0566$ ] | 13827<br>[ $R_{\text{int}}=0.0798$<br>$R_{\text{sigma}}=0.0951$ ] | 2771<br>[ $R_{\text{int}}=0.0398$<br>$R_{\text{sigma}}=0.0342$ ] |
| Completeness                                    | 100%                                                              | 100%                                                             | 100%                                                             | 100%                                                              | 100%                                                             |
| Data/parameters                                 | 13966/31/651                                                      | 5570/0/312                                                       | 5586/0/311                                                       | 13827/6/622                                                       | 2771/0/157                                                       |
| GOF on $F^2$                                    | 1.022                                                             | 0.895                                                            | 0.972                                                            | 1.033                                                             | 1.093                                                            |
| Final R indices<br>[ $I > 2\sigma(I)$ ]         | $R_1 = 0.0491$<br>$wR_2 = 0.0912$                                 | $R_1 = 0.0185$<br>$wR_2 = 0.0397$                                | $R_1 = 0.0267$<br>$wR_2 = 0.0504$                                | $R_1 = 0.0607$<br>$wR_2 = 0.1320$                                 | $R_1 = 0.0237$<br>$wR_2 = 0.0525$                                |
| Final R indices<br>[all data]                   | $R_1 = 0.0905$<br>$wR_2 = 0.1071$                                 | $R_1 = 0.0207$<br>$wR_2 = 0.0406$                                | $R_1 = 0.0324$<br>$wR_2 = 0.0525$                                | $R_1 = 0.1098$<br>$wR_2 = 0.1579$                                 | $R_1 = 0.0364$<br>$wR_2 = 0.0576$                                |
| Largest diff.<br>peak/hole (e·Å <sup>-3</sup> ) | 2.03/-1.85                                                        | 0.44/-0.33                                                       | 0.59/-0.45                                                       | 1.91/-1.84                                                        | 0.98/-0.91                                                       |
| CCDC                                            | 2329976                                                           | 2329977                                                          | 2329978                                                          | 2329979                                                           | 2329980                                                          |

<sup>a</sup> Complex **3** was heated at different temperatures (40 °C, 50 °C, 60 °C, 70 °C, and 80 °C) within a glovebox for 20 minutes, followed by X-ray diffraction data collection at 193 K.



#### 4. DFT calculations

**Computational details.** The DFT calculations were carried out by employing hybrid functional (B3PW91)<sup>5</sup> along with small core pseudopotential Stuttgart basis set<sup>6</sup> for uranium, chlorine and phosphorus atoms (polarization functions<sup>7</sup> were added for phosphorus and chlorine atoms), and Pople basis set<sup>8</sup> (6-31G\*\*) for the rest of the atoms. Frequency calculations were performed to locate minima for the optimized structures and for obtaining thermal corrections over the energies. To account for the solvation effects, SMD model using THF solvent has been included in the calculations.<sup>9</sup> All the calculations were performed using Gaussian 09 suite of programs.<sup>10</sup>

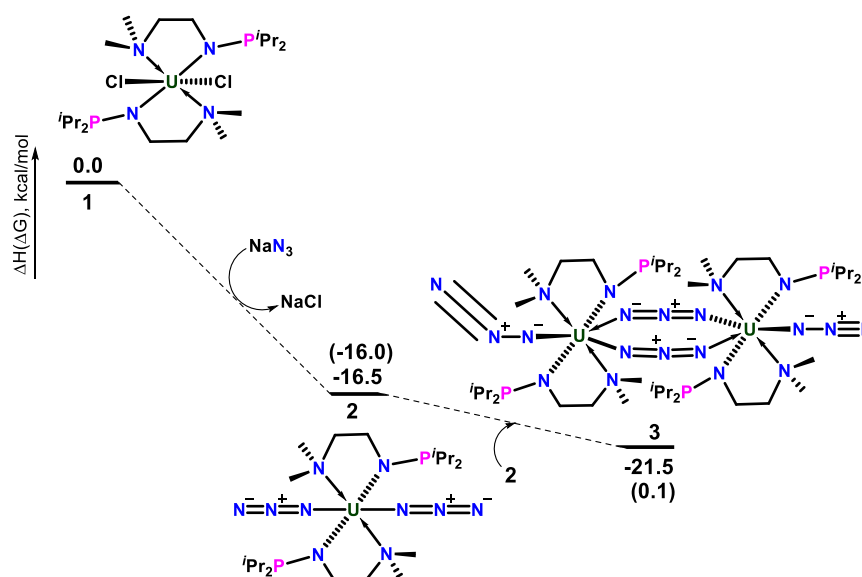

**Figure S18.** Computed enthalpy profile for the formation of **2** and **3** from complex **1**

**Table S4.** Computed Natural charges for complex **2**,  $s=1$

| Atom Label | Natural charges |
|------------|-----------------|
| U1         | 1.50354         |
| N3         | -1.07582        |
| N4         | -0.55263        |
| N5         | -0.52364        |
| N6         | 0.25388         |
| N19        | -0.30903        |
| N43        | -1.07575        |
| N44        | -0.55281        |
| N45        | -0.52359        |
| N46        | 0.25389         |
| N59        | -0.30886        |

**Table S5.** Computed Wiberg bond index (WBI) for complex **2**, s=1

| Atom Label | WBI    |
|------------|--------|------------|--------|------------|--------|------------|--------|
| U1         | 0.0000 | U1         | 0.0000 | U1         | 0.0000 | N4         | 0.0000 |
| N3         | 0.7801 | N4         | 0.5971 | N5         | 0.2378 | N6         | 1.7145 |
| Atom Label | WBI    |
| N6         | 0.0000 | U1         | 0.0000 | U1         | 0.0000 | U1         | 0.0000 |
| N19        | 2.1404 | N43        | 0.7801 | N44        | 0.5972 | N45        | 0.2378 |
| Atom Label | WBI    | Atom Label | WBI    |            |        |            |        |
| N44        | 0.0000 | N44        | 0.0000 |            |        |            |        |
| N46        | 1.7144 | N59        | 2.1405 |            |        |            |        |

**Table S6.** Bonding orbitals from NBO analysis for **2**, s=1

(0.97236) BD (1) U 1- N 3  
(12.80%) 0.3578\* U 1 s( 9.52%)p 0.04( 0.40%)d 4.25( 40.42%) f 5.21( 49.61%)g 0.00( 0.04%)  
(87.20%) 0.9338\* N 3 s( 39.81%)p 1.51( 60.19%)d 0.00( 0.00%)  
(0.92991) BD (2) U 1- N 3  
(11.86%) 0.3444\* U 1 s( 0.07%)p 5.54( 0.41%)d99.99( 49.92%) f99.99( 49.58%)g 0.17( 0.01%)  
(88.14%) 0.9388\* N 3 s( 0.02%)p99.99( 99.97%)d 0.66( 0.01%)  
(0.97604) BD (1) U 1- N 4  
( 9.04%) 0.3006\* U 1 s( 15.42%)p 0.05( 0.81%)d 2.24( 34.56%) f 3.19( 49.19%)g 0.00( 0.01%)  
(90.96%) 0.9537\* N 4 s( 68.43%)p 0.46( 31.56%)d 0.00( 0.01%)  
(0.95318) BD (1) U 1- N 5  
( 6.35%) 0.2521\* U 1 s( 12.66%)p 0.08( 1.01%)d 2.95( 37.33%) f 3.87( 49.00%)g 0.00( 0.00%)  
(93.65%) 0.9677\* N 5 s( 19.94%)p 4.01( 80.04%)d 0.00( 0.02%)  
(0.97236) BD (1) U 1- N 43  
(12.80%) 0.3578\* U 1 s( 9.52%)p 0.04( 0.40%)d 4.25( 40.46%) f 5.21( 49.58%)g 0.00( 0.04%)  
(87.20%) 0.9338\* N 43 s( 39.81%)p 1.51( 60.18%)d 0.00( 0.00%)  
(0.92991) BD (2) U 1- N 43  
(11.87%) 0.3445\* U 1 s( 0.08%)p 5.36( 0.41%)d99.99( 49.90%) f99.99( 49.60%)g 0.16( 0.01%)  
(88.13%) 0.9388\* N 43 s( 0.02%)p99.99( 99.97%)d 0.64( 0.01%)  
(0.97604) BD (1) U 1- N 44  
( 9.04%) 0.3006\* U 1 s( 15.41%)p 0.05( 0.81%)d 2.24( 34.57%) f 3.19( 49.19%)g 0.00( 0.02%)  
(90.96%) 0.9538\* N 44 s( 68.43%)p 0.46( 31.56%)d 0.00( 0.01%)  
(0.95317) BD (1) U 1- N 45

( 6.35%) 0.2521\* U 1 s( 12.66%)p 0.08( 1.01%)d 2.95( 37.35%) f 3.87( 48.98%)g  
0.00( 0.00%)  
( 93.65%) 0.9677\* N 45 s( 19.94%)p 4.01( 80.04%)d 0.00( 0.02%)  
(0.99480) BD ( 1) N 4- N 6  
( 45.32%) 0.6732\* N 4 s( 31.53%)p 2.17( 68.28%)d 0.01( 0.19%)  
( 54.68%) 0.7395\* N 6 s( 50.30%)p 0.99( 49.62%)d 0.00( 0.08%)  
(0.99648) BD ( 1) N 6- N 19  
( 56.43%) 0.7512\* N 6 s( 49.32%)p 1.03( 50.60%)d 0.00( 0.08%)  
( 43.57%) 0.6601\* N 19 s( 32.09%)p 2.11( 67.58%)d 0.01( 0.33%)  
(0.99419) BD ( 2) N 6- N 19  
( 50.54%) 0.7109\* N 6 s( 0.17%)p99.99( 99.66%)d 0.99( 0.17%)  
( 49.46%) 0.7033\* N 19 s( 0.16%)p99.99( 99.46%)d 2.41( 0.38%)  
(0.99332) BD ( 3) N 6- N 19  
( 50.77%) 0.7125\* N 6 s( 0.03%)p99.99( 99.80%)d 5.06( 0.17%)  
( 49.23%) 0.7017\* N 19 s( 0.03%)p99.99( 99.59%)d10.93( 0.38%)  
(0.99480) BD ( 1) N 44- N 46  
( 45.32%) 0.6732\* N 44 s( 31.53%)p 2.17( 68.29%)d 0.01( 0.19%)  
( 54.68%) 0.7395\* N 46 s( 50.30%)p 0.99( 49.62%)d 0.00( 0.08%)  
(0.99648) BD ( 1) N 46- N 59  
( 56.43%) 0.7512\* N 46 s( 49.32%)p 1.03( 50.60%)d 0.00( 0.08%)  
( 43.57%) 0.6601\* N 59 s( 32.09%)p 2.11( 67.58%)d 0.01( 0.33%)  
(0.99420) BD ( 2) N 46- N 59  
( 50.54%) 0.7109\* N 46 s( 0.17%)p99.99( 99.66%)d 0.99( 0.17%)  
( 49.46%) 0.7033\* N 59 s( 0.16%)p99.99( 99.46%)d 2.43( 0.38%)  
(0.99332) BD ( 3) N 46- N 59  
( 50.77%) 0.7125\* N 46 s( 0.03%)p99.99( 99.80%)d 5.11( 0.17%)  
( 49.23%) 0.7017\* N 59 s( 0.03%)p99.99( 99.59%)d11.06( 0.38%)

**Table S7.** Second order perturbation analysis for **2**, s=1

| Donor NBO                                                          | Acceptor NBO                                                                                                                                                            | E(2)<br>kcal/mol |
|--------------------------------------------------------------------|-------------------------------------------------------------------------------------------------------------------------------------------------------------------------|------------------|
| (0.71376) LP ( 1) N 4<br>s( 0.07%)p99.99( 99.81%)d<br>1.62( 0.11%) | (0.07444) LV ( 1) U 1<br>s( 0.90%)p<br>0.00( 0.00%)d99.99( 99.08%)f<br>0.00( 0.00%)g 0.02( 0.02%)                                                                       | 6.33             |
| (0.71376) LP ( 1) N 4<br>s( 0.07%)p99.99( 99.81%)d<br>1.62( 0.11%) | (0.23979) BD*( 2) N 6- N 19<br>( 49.46%) 0.7033* N 6<br>s( 0.17%)p99.99( 99.66%)d 0.99( 0.17%)<br>( 50.54%) -0.7109* N 19<br>s( 0.16%)p99.99( 99.46%)d 2.41( 0.38%)     | 59.11            |
| (0.71376) LP ( 1) N 4<br>s( 0.07%)p99.99( 99.81%)d<br>1.62( 0.11%) | (0.23731) BD*( 3) N 6- N 19<br>( 49.23%) 0.7017* N 6<br>s( 0.03%)p99.99( 99.80%)d 5.06( 0.17%)<br>( 50.77%) -0.7125* N 19<br>s( 0.03%)p99.99( 99.59%)d10.93( 0.38<br>%) | 20.22            |

|                                                                      |                                                                                                                                                                           |       |
|----------------------------------------------------------------------|---------------------------------------------------------------------------------------------------------------------------------------------------------------------------|-------|
| (0.70328) LP ( 2) N 4<br>s( 0.01%)p99.99( 99.86%)d<br>10.29( 0.12%)  | (0.07444) LV ( 1) U 1<br>s( 0.90%)p<br>0.00( 0.00%)d99.99( 99.08%)f<br>0.00( 0.00%)g 0.02( 0.02%)                                                                         | 7.15  |
| (0.70328) LP ( 2) N 4<br>s( 0.01%)p99.99( 99.86%)d<br>10.29( 0.12%)  | (0.23979) BD*( 2) N 6- N 19<br>( 49.46%) 0.7033* N 6<br>s( 0.17%)p99.99( 99.66%)d 0.99( 0.17%)<br>( 50.54%) -0.7109* N 19<br>s( 0.16%)p99.99( 99.46%)d 2.41( 0.38%)       | 21.91 |
| (0.70328) LP ( 2) N 4<br>s( 0.01%)p99.99( 99.86%)d<br>10.29( 0.12%)  | (0.23731) BD*( 3) N 6- N 19<br>( 49.23%) 0.7017* N 6<br>s( 0.03%)p99.99( 99.80%)d 5.06( 0.17%)<br>( 50.77%) -0.7125* N 19<br>s( 0.03%)p99.99( 99.59%)d10.93( 0.38<br>%)   | 65.49 |
| (0.71377) LP ( 1) N 44<br>s( 0.07%)p99.99( 99.81%)d<br>1.62( 0.11%)  | (0.07444) LV ( 1) U 1<br>s( 0.90%)p<br>0.00( 0.00%)d99.99( 99.08%)f<br>0.00( 0.00%)g 0.02( 0.02%)                                                                         | 6.30  |
| (0.71377) LP ( 1) N 44<br>s( 0.07%)p99.99( 99.81%)d<br>1.62( 0.11%)  | (0.23973) BD*( 2) N 46- N 59<br>( 49.46%) 0.7033* N 46<br>s( 0.17%)p99.99( 99.66%)d 0.99( 0.17%)<br>( 50.54%) -0.7109* N 59<br>s( 0.16%)p99.99( 99.46%)d 2.43( 0.38%)     | 59.21 |
| (0.71377) LP ( 1) N 44<br>s( 0.07%)p99.99( 99.81%)d<br>1.62( 0.11%)  | (0.23728) BD*( 3) N 46- N 59<br>( 49.23%) 0.7017* N 46<br>s( 0.03%)p99.99( 99.80%)d 5.11( 0.17%)<br>( 50.77%) -0.7125* N 59<br>s( 0.03%)p99.99( 99.59%)d11.06( 0.38<br>%) | 20.12 |
| (0.70333) LP ( 2) N 44<br>s( 0.01%)p99.99( 99.86%)d<br>10.26( 0.12%) | (0.07444) LV ( 1) U 1<br>s( 0.90%)p<br>0.00( 0.00%)d99.99( 99.08%)f<br>0.00( 0.00%)g 0.02( 0.02%)                                                                         | 7.11  |
| (0.70333) LP ( 2) N 44<br>s( 0.01%)p99.99( 99.86%)d<br>10.26( 0.12%) | (0.23973) BD*( 2) N 46- N 59<br>( 49.46%) 0.7033* N 46<br>s( 0.17%)p99.99( 99.66%)d 0.99( 0.17%)<br>( 50.54%) -0.7109* N 59<br>s( 0.16%)p99.99( 99.46%)d 2.43( 0.38%)     | 21.79 |
| (0.70333) LP ( 2) N 44<br>s( 0.01%)p99.99( 99.86%)d<br>10.26( 0.12%) | (0.23728) BD*( 3) N 46- N 59<br>( 49.23%) 0.7017* N 46<br>s( 0.03%)p99.99( 99.80%)d 5.11( 0.17%)<br>( 50.77%) -0.7125* N 59<br>s( 0.03%)p99.99( 99.59%)d11.06( 0.38<br>%) | 65.59 |
| (0.98662) LP ( 1) N 59<br>s( 68.13%)p 0.47( 31.83%)d<br>0.00( 0.04%) | (0.01448) BD*( 1) N 44- N 46<br>( 54.68%) 0.7395* N 44 s( 31.53%)p<br>2.17( 68.29%)d 0.01( 0.19%)<br>( 45.32%) -0.6732* N 46 s( 50.30%)p<br>0.99( 49.62%)d 0.00( 0.08%)   | 8.77  |

|                                                                                                                                                                                                               |                                                                                                                                                                         |      |
|---------------------------------------------------------------------------------------------------------------------------------------------------------------------------------------------------------------|-------------------------------------------------------------------------------------------------------------------------------------------------------------------------|------|
| (0.97604) BD ( 1) U 1- N 4<br>( 9.04%) 0.3006* U 1<br>s( 15.42%)p 0.05( 0.81%)d<br>2.24( 34.56%) f<br>3.19( 49.19%)g<br>0.00( 0.01%)<br>( 90.96%) 0.9537* N 4<br>s( 68.43%)p 0.46( 31.56%)d<br>0.00( 0.01%)   | (0.00967) BD*( 1) N 6- N 19<br>( 43.57%) 0.6601* N 6 s( 49.32%)p<br>1.03( 50.60%)d 0.00( 0.08%)<br>( 56.43%) -0.7512* N 19 s( 32.09%)p<br>2.11( 67.58%)d 0.01( 0.33%)   | 7.90 |
| (0.97604) BD ( 1) U 1- N 44<br>( 9.04%) 0.3006* U 1<br>s( 15.41%)p 0.05( 0.81%)d<br>2.24( 34.57%) f<br>3.19( 49.19%)g<br>0.00( 0.02%)<br>( 90.96%) 0.9538* N 44<br>s( 68.43%)p 0.46( 31.56%)d<br>0.00( 0.01%) | (0.00966) BD*( 1) N 46- N 59<br>( 43.57%) 0.6601* N 46 s( 49.32%)p<br>1.03( 50.60%)d 0.00( 0.08%)<br>( 56.43%) -0.7512* N 59 s( 32.09%)p<br>2.11( 67.58%)d 0.01( 0.33%) | 7.90 |

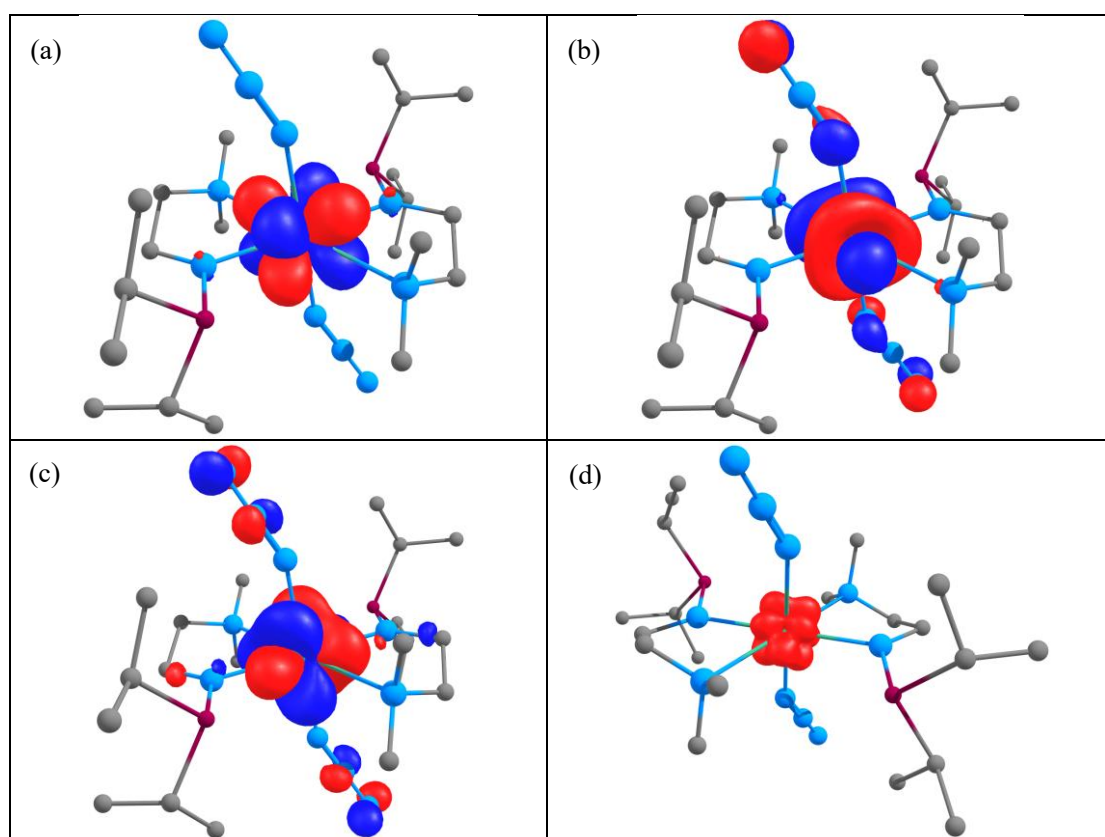

**Figure S19.** Computed MO's for **2**,  $s=1$ . (a)HOMO-1 (b)HOMO (c)LUMO (d)spin density plot ( $s=1$ )

**Table S8.** Spin energetics for **3**

| Spin states      | $\Delta H$<br>(kcal/mol) |
|------------------|--------------------------|
| s=2              | 0.1                      |
| s=1              | 10.5                     |
| s=0 (open-shell) | 0.0                      |

**Table S9.** Computed Natural charges for complex **3**, s=2

| Atom Label | Natural charges |
|------------|-----------------|
| U1         | 1.27712         |
| N4         | -1.05282        |
| N5         | -1.05203        |
| N6         | -0.50159        |
| N7         | -0.50653        |
| N8         | 0.31508         |
| N9         | -0.52073        |
| N10        | 0.31064         |
| N11        | -0.38291        |
| N14        | -0.38924        |
| N37        | 0.25783         |
| N74        | -0.31298        |
| N83        | -0.37557        |
| N84        | -0.38071        |
| U85        | 1.27400         |
| N88        | -1.05414        |
| N89        | -1.05316        |
| N90        | -0.50094        |
| N91        | -0.50823        |
| N92        | -0.52773        |
| N117       | 0.25742         |
| N154       | -0.31149        |

**Table S10.** Computed Wiberg bond index (WBI) for complex **3**, s=2

| Atom Label | WBI    |
|------------|--------|------------|--------|------------|--------|------------|--------|
| U1         | 0.0000 | U1         | 0.0000 | U1         | 0.0000 | U1         | 0.0000 |
| N4         | 0.8285 | N5         | 0.8199 | N6         | 0.2119 | N7         | 0.2283 |
| Atom Label | WBI    |
| U1         | 0.0000 | U1         | 0.0000 | U1         | 0.0000 | N10        | 0.0000 |
| N9         | 0.6387 | N11        | 0.4324 | N14        | 0.4361 | N11        | 1.9152 |
| Atom Label | WBI    |
| N10        | 0.0000 | U85        | 0.0000 | U85        | 0.0000 | U85        | 0.0000 |
| N84        | 1.9184 | N83        | 0.4238 | N84        | 0.4310 | N88        | 0.8321 |
| Atom Label | WBI    |
| U85        | 0.0000 | U85        | 0.0000 | U85        | 0.0000 | U85        | 0.0000 |
| N89        | 0.8223 | N90        | 0.2175 | N91        | 0.2293 | N92        | 0.6340 |
| Atom Label | WBI    |

|            |        |            |        |     |        |     |        |
|------------|--------|------------|--------|-----|--------|-----|--------|
| N8         | 0.0000 | N8         | 0.0000 | N37 | 0.0000 | N37 | 0.0000 |
| N14        | 1.9088 | N83        | 1.9294 | N9  | 1.7195 | N74 | 2.1342 |
| Atom Label | WBI    | Atom Label | WBI    |     |        |     |        |
| N117       | 0.0000 | N117       | 0.0000 |     |        |     |        |
| N92        | 1.7186 | N154       | 2.1354 |     |        |     |        |

**Table S11.** Bonding orbitals from NBO analysis for **3**, s=2

(0.97221) BD (1) U 1- N 4  
(13.26%) 0.3641\* U 1 s(10.34%)p 0.05(0.47%)d 3.72(38.53%) f 4.89(50.62%)g  
0.00(0.05%)  
(86.74%) 0.9314\* N 4 s(40.93%)p 1.44(59.07%)d 0.00(0.00%)  
(0.93362) BD (2) U 1- N 4  
(12.81%) 0.3579\* U 1 s(0.05%)p 29.70(1.62%)d 99.99(49.95%) f 99.99(48.33%)g  
0.81(0.04%)  
(87.19%) 0.9338\* N 4 s(0.03%)p 99.99(99.97%)d 0.35(0.01%)  
(0.97244) BD (1) U 1- N 5  
(13.17%) 0.3629\* U 1 s(10.74%)p 0.05(0.51%)d 3.73(40.02%) f 4.53(48.69%)g  
0.00(0.05%)  
(86.83%) 0.9318\* N 5 s(41.37%)p 1.42(58.62%)d 0.00(0.01%)  
(0.93035) BD (2) U 1- N 5  
(12.60%) 0.3549\* U 1 s(0.03%)p 43.04(1.48%)d 99.99(51.21%) f 99.99(47.23%)g  
1.46(0.05%)  
(87.40%) 0.9349\* N 5 s(0.03%)p 99.99(99.95%)d 0.40(0.01%)  
(0.94334) BD (1) U 1- N 7  
(5.49%) 0.2344\* U 1 s(8.92%)p 0.48(4.30%)d 4.01(35.76%) f 5.72(50.98%)g  
0.00(0.04%)  
(94.51%) 0.9721\* N 7 s(19.49%)p 4.13(80.49%)d 0.00(0.02%)  
(0.96422) BD (1) U 1- N 9  
(8.93%) 0.2989\* U 1 s(14.69%)p 0.26(3.87%)d 3.01(44.21%) f 2.52(37.01%)g  
0.02(0.22%)  
(91.07%) 0.9543\* N 9 s(66.80%)p 0.50(33.20%)d 0.00(0.00%)  
(0.96370) BD (1) U 1- N 11  
(7.85%) 0.2801\* U 1 s(11.85%)p 0.33(3.89%)d 4.94(58.51%) f 2.16(25.61%)g  
0.01(0.13%)  
(92.15%) 0.9600\* N 11 s(68.38%)p 0.46(31.60%)d 0.00(0.02%)  
(0.96367) BD (1) U 1- N 14  
(7.55%) 0.2748\* U 1 s(11.48%)p 0.42(4.78%)d 4.30(49.37%) f 2.98(34.22%)g  
0.01(0.16%)  
(92.45%) 0.9615\* N 14 s(68.22%)p 0.47(31.77%)d 0.00(0.02%)  
(0.95944) BD (1) N 83- U 85  
(92.21%) 0.9603\* N 83 s(66.88%)p 0.50(33.11%)d 0.00(0.01%)  
(7.79%) 0.2791\* U 85 s(12.44%)p 0.39(4.83%)d 3.92(48.79%) f 2.71(33.78%)g  
0.01(0.15%)  
(0.96058) BD (1) N 84- U 85  
(91.99%) 0.9591\* N 84 s(66.90%)p 0.49(33.09%)d 0.00(0.02%)

( 8.01%) 0.2831\* U 85 s( 12.52%)p 0.31( 3.84%)d 4.81( 60.24%) f 1.86( 23.27%)g  
0.01( 0.13%)  
(0.97055) BD ( 1) U 85- N 88  
( 13.59%) 0.3687\* U 85 s( 10.34%)p 0.05( 0.48%)d 3.73( 38.56%) f 4.89( 50.57%)g  
0.01( 0.05%)  
( 86.41%) 0.9296\* N 88 s( 40.57%)p 1.46( 59.42%)d 0.00( 0.01%)  
(0.93427) BD ( 2) U 85- N 88  
( 12.44%) 0.3527\* U 85 s( 0.09%)p18.61( 1.64%)d99.99( 49.46%) f99.99( 48.77%)g  
0.56( 0.05%)  
( 87.56%) 0.9357\* N 88 s( 0.04%)p99.99( 99.95%)d 0.20( 0.01%)  
(0.97087) BD ( 1) U 85- N 89  
( 13.49%) 0.3673\* U 85 s( 10.69%)p 0.05( 0.53%)d 3.75( 40.03%) f 4.56( 48.70%)g  
0.00( 0.05%)  
( 86.51%) 0.9301\* N 89 s( 40.97%)p 1.44( 59.03%)d 0.00( 0.01%)  
(0.93054) BD ( 2) U 85- N 89  
( 12.18%) 0.3489\* U 85 s( 0.04%)p41.40( 1.59%)d99.99( 51.08%) f99.99( 47.24%)g  
1.41( 0.05%)  
( 87.82%) 0.9371\* N 89 s( 0.04%)p99.99( 99.95%)d 0.33( 0.01%)  
(0.94244) BD ( 1) U 85- N 90  
( 5.27%) 0.2295\* U 85 s( 8.64%)p 0.55( 4.74%)d 4.55( 39.36%) f 5.46( 47.22%)g  
0.01( 0.05%)  
( 94.73%) 0.9733\* N 90 s( 18.20%)p 4.49( 81.77%)d 0.00( 0.03%)  
(0.94384) BD ( 1) U 85- N 91  
( 5.55%) 0.2356\* U 85 s( 9.05%)p 0.44( 4.00%)d 4.34( 39.33%) f 5.25( 47.57%)g  
0.00( 0.04%)  
( 94.45%) 0.9719\* N 91 s( 19.34%)p 4.17( 80.64%)d 0.00( 0.02%)  
(0.96586) BD ( 1) U 85- N 92  
( 8.08%) 0.2842\* U 85 s( 15.81%)p 0.25( 3.99%)d 2.93( 46.30%) f 2.13( 33.66%)g  
0.02( 0.24%)  
( 91.92%) 0.9588\* N 92 s( 67.32%)p 0.49( 32.68%)d 0.00( 0.00%)



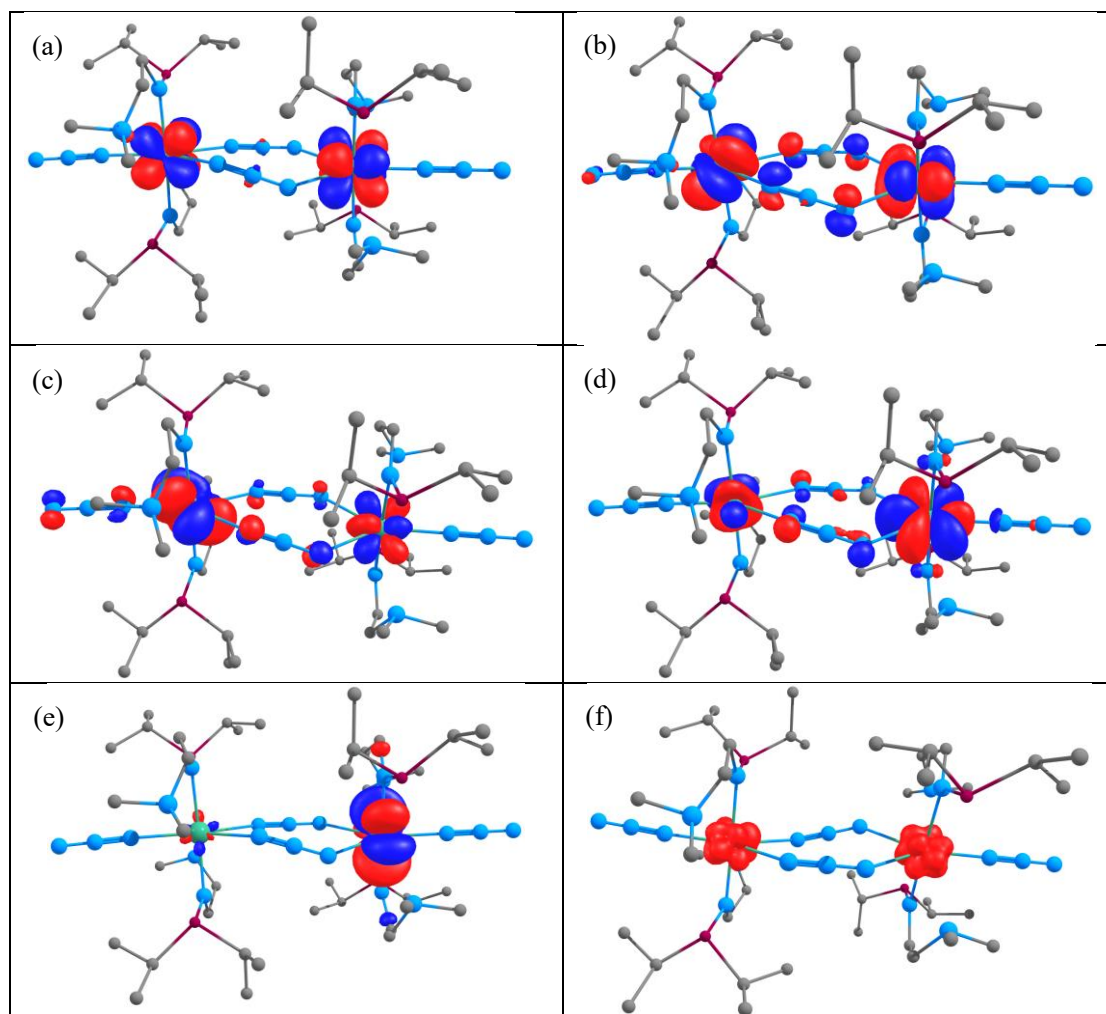

**Figure S20.** DFT computed MO's for **3**,  $s=2$ . (a) HOMO-3 (b) HOMO-2 (c) HOMO-1 (d) HOMO (e) LUMO (f) spin density plot

**Table S12.** Computed spin states for **4**

| Spin states        | $\Delta H$ ( $\Delta G$ ), kcal/mol |
|--------------------|-------------------------------------|
| $s=1$              | 0.1 (0.0)                           |
| $s=0$              | 30.7 (33.7)                         |
| $s=0$ (open shell) | 0.0 (0.2)                           |

**Table S13.** Computed Natural charges for complex **4**, s=1

| Atom Label | Natural charges |
|------------|-----------------|
| U1         | 1.54337         |
| U2         | 1.72280         |
| N7         | -0.98627        |
| N8         | -0.50927        |
| N9         | -0.98637        |
| N10        | -0.51030        |
| N15        | -1.11918        |
| N16        | -0.49664        |
| N17        | -1.09286        |
| N18        | -1.11909        |
| N19        | -0.49857        |
| N20        | -1.08886        |

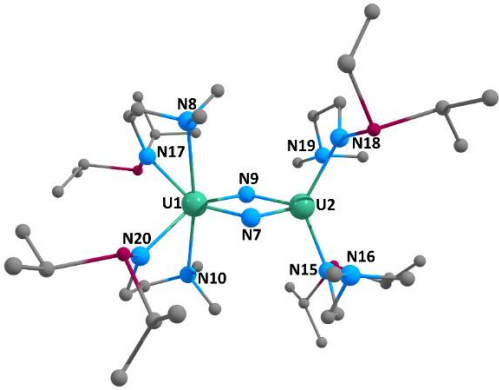
**Table S14.** Computed Wiberg bond index (WBI) for complex **4**, s=1

| Atom Label | WBI    |
|------------|--------|------------|--------|------------|--------|------------|--------|
| U1         | 0.0000 | U1         | 0.0000 | U1         | 0.0000 | U1         | 0.0000 |
| N7         | 1.4338 | N9         | 1.3785 | N8         | 0.2607 | N10        | 0.2616 |
| Atom Label | WBI    |
| U1         | 0.0000 | U1         | 0.0000 | U2         | 0.0000 | U2         | 0.0000 |
| N17        | 0.6698 | N20        | 0.6787 | N7         | 1.3690 | N9         | 1.4292 |
| Atom Label | WBI    |
| U2         | 0.0000 | U2         | 0.0000 | U2         | 0.0000 | U2         | 0.0000 |
| N15        | 0.6358 | N16        | 0.2076 | N18        | 0.6321 | N19        | 0.2167 |
| Atom Label | WBI    | Atom Label | WBI    |            |        |            |        |
| U1         | 0.0000 | N7         | 0.0000 |            |        |            |        |
| U2         | 0.5015 | N9         | 0.0276 |            |        |            |        |

**Table S15.** Bonding orbitals from NBO analysis for **4**, s=1

(0.96184) BD (1) U 1- N 7  
 ( 18.30%) 0.4278\* U 1 s( 7.66%)p 0.04( 0.30%)d 6.11( 46.75%) f 5.91( 45.26%)g  
 0.00( 0.04%)  
 ( 81.70%) 0.9039\* N 7 s( 48.70%)p 1.05( 51.21%)d 0.00( 0.09%)  
 (0.95498) BD (1) U 1- N 8  
 ( 8.06%) 0.2839\* U 1 s( 13.01%)p 0.06( 0.72%)d 3.29( 42.76%) f 3.34( 43.50%)g  
 0.00( 0.01%)  
 ( 91.94%) 0.9588\* N 8 s( 21.07%)p 3.75( 78.92%)d 0.00( 0.01%)  
 (0.96154) BD (1) U 1- N 9  
 ( 17.95%) 0.4237\* U 1 s( 8.38%)p 0.04( 0.30%)d 5.82( 48.76%) f 5.08( 42.53%)g  
 0.00( 0.04%)  
 ( 82.05%) 0.9058\* N 9 s( 48.64%)p 1.05( 51.27%)d 0.00( 0.09%)  
 (0.95529) BD (1) U 1- N 10  
 ( 8.09%) 0.2845\* U 1 s( 12.07%)p 0.06( 0.72%)d 3.59( 43.29%) f 3.64( 43.90%)g  
 0.00( 0.01%)

( 91.91%) 0.9587\* N 10 s( 21.19%)p 3.72( 78.80%)d 0.00( 0.01%)  
(0.97032) BD ( 1) U 1- N 17  
( 12.33%) 0.3512\* U 1 s( 11.60%)p 0.05( 0.59%)d 3.91( 45.36%) f 3.66( 42.41%)g  
0.00( 0.03%)  
( 87.67%) 0.9363\* N 17 s( 40.51%)p 1.47( 59.49%)d 0.00( 0.00%)  
(0.91607) BD ( 2) U 1- N 17  
( 8.23%) 0.2870\* U 1 s( 0.02%)p30.25( 0.69%)d99.99( 47.19%) f99.99( 52.05%)g  
1.90( 0.04%)  
( 91.77%) 0.9579\* N 17 s( 0.00%)p 1.00( 99.98%)d 0.00( 0.02%)  
(0.97125) BD ( 1) U 1- N 20  
( 12.45%) 0.3529\* U 1 s( 11.08%)p 0.05( 0.53%)d 3.98( 44.07%) f 4.00( 44.28%)g  
0.00( 0.03%)  
( 87.55%) 0.9357\* N 20 s( 40.46%)p 1.47( 59.53%)d 0.00( 0.01%)  
(0.91845) BD ( 2) U 1- N 20  
( 8.39%) 0.2897\* U 1 s( 0.28%)p 2.66( 0.76%)d99.99( 46.79%) f99.99( 52.12%)g  
0.16( 0.04%)  
( 91.61%) 0.9571\* N 20 s( 0.02%)p99.99( 99.97%)d 0.83( 0.02%)  
(0.95522) BD ( 1) U 2- N 7  
( 18.21%) 0.4268\* U 2 s( 6.81%)p 0.06( 0.41%)d 6.61( 44.99%) f 7.01( 47.75%)g  
0.01( 0.04%)  
( 81.79%) 0.9044\* N 7 s( 47.75%)p 1.09( 52.15%)d 0.00( 0.10%)  
(0.95695) BD ( 1) U 2- N 9  
( 18.36%) 0.4285\* U 2 s( 6.62%)p 0.06( 0.41%)d 6.72( 44.46%) f 7.33( 48.48%)g  
0.01( 0.04%)  
( 81.64%) 0.9036\* N 9 s( 47.08%)p 1.12( 52.82%)d 0.00( 0.10%)  
(0.97186) BD ( 1) U 2- N 15  
( 9.25%) 0.3042\* U 2 s( 15.43%)p 0.05( 0.73%)d 3.67( 56.66%) f 1.76( 27.14%)g  
0.00( 0.04%)  
( 90.75%) 0.9526\* N 15 s( 41.33%)p 1.42( 58.66%)d 0.00( 0.00%)  
(0.92170) BD ( 2) U 2- N 15  
( 9.56%) 0.3093\* U 2 s( 0.25%)p 0.94( 0.23%)d99.99( 57.65%) f99.99( 41.85%)g  
0.10( 0.02%)  
( 90.44%) 0.9510\* N 15 s( 0.07%)p99.99( 99.92%)d 0.20( 0.01%)  
(0.94704) BD ( 1) U 2- N 16  
( 5.75%) 0.2399\* U 2 s( 12.09%)p 0.07( 0.81%)d 3.20( 38.66%) f 4.01( 48.44%)g  
0.00( 0.01%)  
( 94.25%) 0.9708\* N 16 s( 16.54%)p 5.04( 83.43%)d 0.00( 0.03%)  
(0.97191) BD ( 1) U 2- N 18  
( 9.55%) 0.3091\* U 2 s( 15.21%)p 0.05( 0.69%)d 3.61( 54.97%) f 1.91( 29.10%)g  
0.00( 0.03%)  
( 90.45%) 0.9510\* N 18 s( 41.10%)p 1.43( 58.90%)d 0.00( 0.00%)  
(0.92110) BD ( 2) U 2- N 18  
( 9.35%) 0.3058\* U 2 s( 0.26%)p 0.94( 0.25%)d99.99( 58.32%) f99.99( 41.15%)g  
0.10( 0.02%)

( 90.65%) 0.9521\* N 18 s( 0.09%)p99.99( 99.89%)d 0.16( 0.01%)  
(0.94758) BD ( 1) U 2- N 19  
( 6.04%) 0.2458\* U 2 s( 12.61%)p 0.06( 0.75%)d 3.07( 38.70%) f 3.80( 47.93%)g  
0.00( 0.01%)  
( 93.96%) 0.9693\* N 19 s( 16.93%)p 4.91( 83.05%)d 0.00( 0.03%)

**Table S16.** Second order perturbation analysis for 4, s=1

| Donor NBO                                                                       | Acceptor NBO                                                                                      | E(2)<br>kcal/mol |
|---------------------------------------------------------------------------------|---------------------------------------------------------------------------------------------------|------------------|
| (0.67586) LP ( 1) N 7<br>s( 2.60%)p37.39( 97.26%)d<br>0.05( 0.14%)              | (0.16017) LV ( 1) U 1<br>s( 9.44%)p 0.02( 0.15%)d 3.29( 31.08%)<br>f 6.29( 59.31%)g 0.00( 0.02%)  | 6.40             |
| (0.67586) LP ( 1) N 7<br>s( 2.60%)p37.39( 97.26%)d<br>0.05( 0.14%)              | (0.13074) LV ( 2) U 1<br>s( 0.16%)p 2.06( 0.32%)d99.99( 44.92%)<br>f99.99( 54.56%)g 0.30( 0.05%)  | 30.13            |
| (0.67586) LP ( 1) N 7<br>s( 2.60%)p37.39( 97.26%)d<br>0.05( 0.14%)              | (0.17176) LV ( 1) U 2<br>s( 2.59%)p 0.02( 0.05%)d12.41( 32.17%)<br>f25.15( 65.16%)g 0.01( 0.02%)  | 12.51            |
| (0.67586) LP ( 1) N 7<br>s( 2.60%)p37.39( 97.26%)d<br>0.05( 0.14%)              | (0.08880) LV ( 3) U 2<br>s( 24.11%)p 0.02( 0.44%)d 1.54( 37.05%)<br>f 1.59( 38.33%)g 0.00( 0.07%) | 7.64             |
| (0.66349) LP ( 2) N 7<br>s( 0.88%)p99.99( 98.97%)d<br>0.16( 0.14%)              | (0.16017) LV ( 1) U 1<br>s( 9.44%)p 0.02( 0.15%)d 3.29( 31.08%)<br>f 6.29( 59.31%)g 0.00( 0.02%)  | 25.59            |
| (0.66349) LP ( 2) N 7<br>s( 0.88%)p99.99( 98.97%)d<br>0.16( 0.14%)              | (0.17176) LV ( 1) U 2<br>s( 2.59%)p 0.02( 0.05%)d12.41( 32.17%)<br>f25.15( 65.16%)g 0.01( 0.02%)  | 10.83            |
| (0.67284) LP ( 1) N 9<br>s( 2.84%)p34.15( 97.02%)d<br>0.05( 0.14%)              | (0.13074) LV ( 2) U 1<br>s( 0.16%)p 2.06( 0.32%)d99.99( 44.92%)<br>f99.99( 54.56%)g 0.30( 0.05%)  | 24.24            |
| (0.67284) LP ( 1) N 9<br>s( 2.84%)p34.15( 97.02%)d<br>0.05( 0.14%)              | (0.17176) LV ( 1) U 2<br>s( 2.59%)p 0.02( 0.05%)d12.41( 32.17%)<br>f25.15( 65.16%)g 0.01( 0.02%)  | 19.15            |
| (0.67284) LP ( 1) N 9<br>s( 2.84%)p34.15( 97.02%)d<br>0.05( 0.14%)              | (0.06690) LV ( 4) U 2<br>s( 0.38%)p 5.14( 1.97%)d64.04( 24.49%)<br>f99.99( 73.03%)g 0.34( 0.13%)  | 6.88             |
| (0.66325) LP ( 2) N 9<br>s( 1.37%)p71.77( 98.48%)d<br>0.11( 0.14%)              | (0.16017) LV ( 1) U 1<br>s( 9.44%)p 0.02( 0.15%)d 3.29( 31.08%)<br>f 6.29( 59.31%)g 0.00( 0.02%)  | 27.49            |
| (0.66325) LP ( 2) N 9<br>s( 1.37%)p71.77( 98.48%)d<br>0.11( 0.14%)              | (0.17176) LV ( 1) U 2<br>s( 2.59%)p 0.02( 0.05%)d12.41( 32.17%)<br>f25.15( 65.16%)g 0.01( 0.02%)  | 7.29             |
| (0.66325) LP ( 2) N 9<br>s( 1.37%)p71.77( 98.48%)d<br>0.11( 0.14%)              | (0.16502) LV ( 2) U 2<br>s( 0.06%)p18.07( 1.09%)d99.99( 7.87%)<br>f99.99( 90.96%)g 0.38( 0.02%)   | 9.42             |
| (0.95522) BD ( 1) U 2- N 7<br>( 18.21%) 0.4268* U 2<br>s( 6.81%)p 0.06( 0.41%)d | (0.16017) LV ( 1) U 1<br>s( 9.44%)p 0.02( 0.15%)d 3.29( 31.08%)<br>f 6.29( 59.31%)g 0.00( 0.02%)  | 6.88             |

|                                                                                                                                                                                                             |                                                                                                   |      |
|-------------------------------------------------------------------------------------------------------------------------------------------------------------------------------------------------------------|---------------------------------------------------------------------------------------------------|------|
| 6.61( 44.99%) f<br>7.01( 47.75%)g<br>0.01( 0.04%)<br>( 81.79%) 0.9044* N 7<br>s( 47.75%)p 1.09( 52.15%)d<br>0.00( 0.10%)                                                                                    |                                                                                                   |      |
| (0.95695) BD ( 1) U 2- N 9<br>( 18.36%) 0.4285* U 2<br>s( 6.62%)p 0.06( 0.41%)d<br>6.72( 44.46%) f<br>7.33( 48.48%)g<br>0.01( 0.04%)<br>( 81.64%) 0.9036* N 9<br>s( 47.08%)p 1.12( 52.82%)d<br>0.00( 0.10%) | (0.16017) LV ( 1) U 1<br>s( 9.44%)p 0.02( 0.15%)d 3.29( 31.08%)<br>f 6.29( 59.31%)g 0.00( 0.02%)  | 6.50 |
| (0.96154) BD ( 1) U 1- N 9<br>( 17.95%) 0.4237* U 1<br>s( 8.38%)p 0.04( 0.30%)d<br>5.82( 48.76%) f<br>5.08( 42.53%)g<br>0.00( 0.04%)<br>( 82.05%) 0.9058* N 9<br>s( 48.64%)p 1.05( 51.27%)d<br>0.00( 0.09%) | (0.08880) LV ( 3) U 2<br>s( 24.11%)p 0.02( 0.44%)d 1.54( 37.05%)<br>f 1.59( 38.33%)g 0.00( 0.07%) | 3.40 |
| (0.96184) BD ( 1) U 1- N 7<br>( 18.30%) 0.4278* U 1<br>s( 7.66%)p 0.04( 0.30%)d<br>6.11( 46.75%) f<br>5.91( 45.26%)g<br>0.00( 0.04%)<br>( 81.70%) 0.9039* N 7<br>s( 48.70%)p 1.05( 51.21%)d<br>0.00( 0.09%) | (0.08880) LV ( 3) U 2<br>s( 24.11%)p 0.02( 0.44%)d 1.54( 37.05%)<br>f 1.59( 38.33%)g 0.00( 0.07%) | 2.99 |

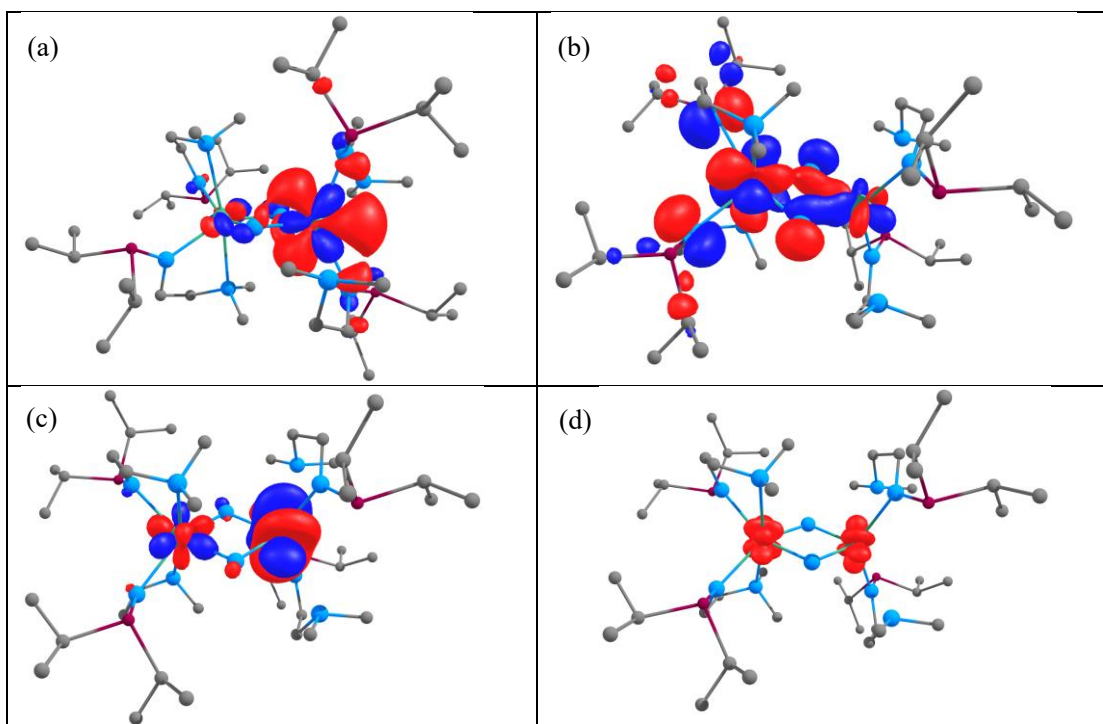

**Figure S21.** Computed MO's for 4 (s=1). (a) HOMO-1 (b) HOMO (c) LUMO (d) spin density plot (s=1)

Computed 100 states, solvent=THF

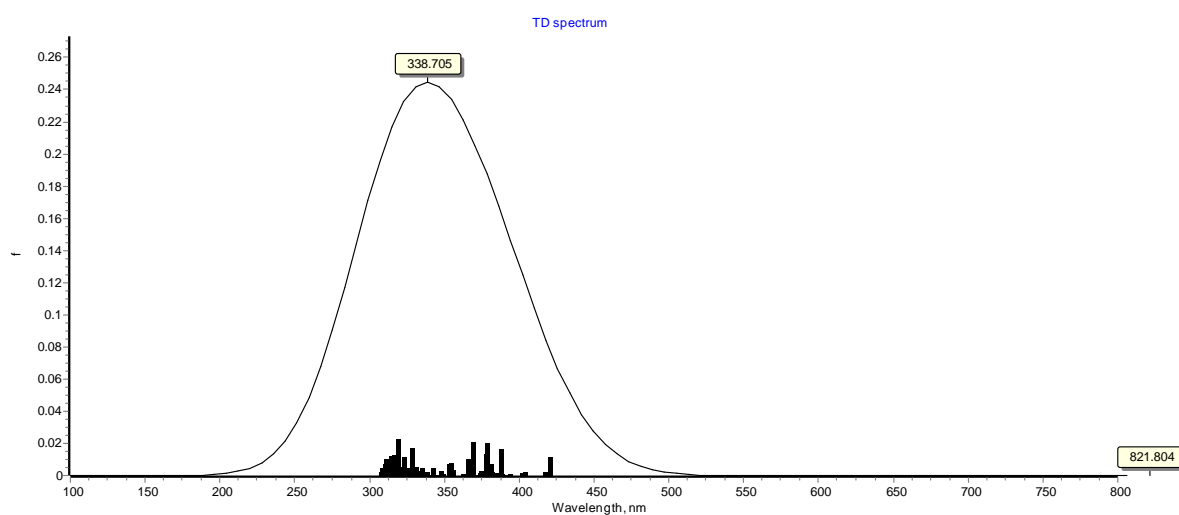

**Figure S22.** TD spectrum for 3 (s=2)

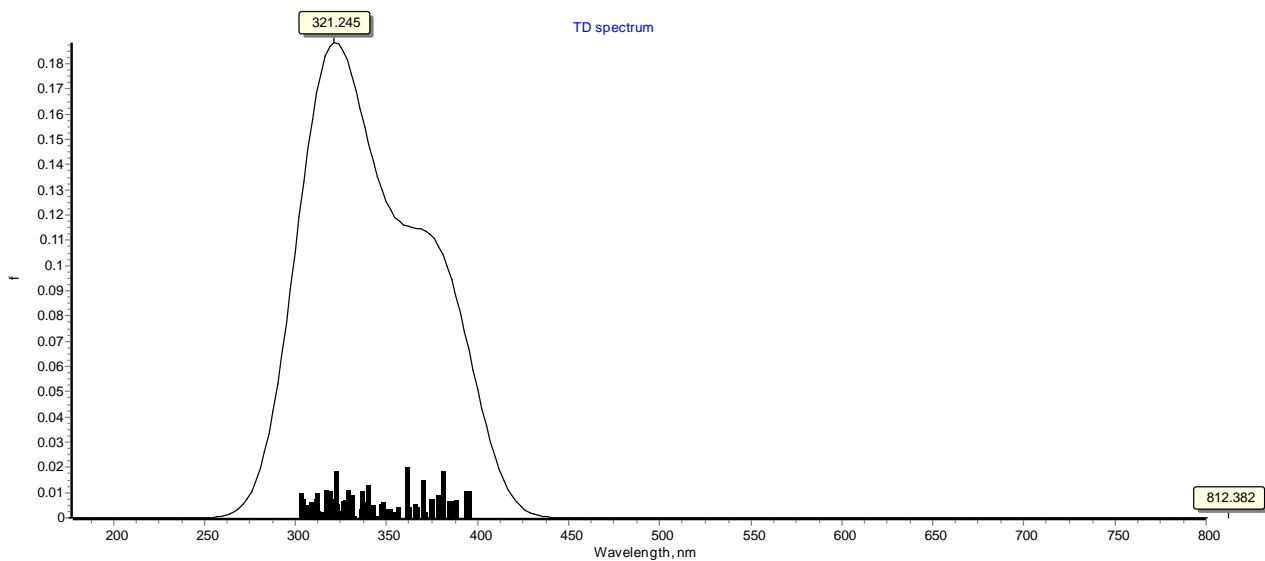

**Figure S23.** TD spectrum for **3** ( $s=0$ , open-shell singlet)

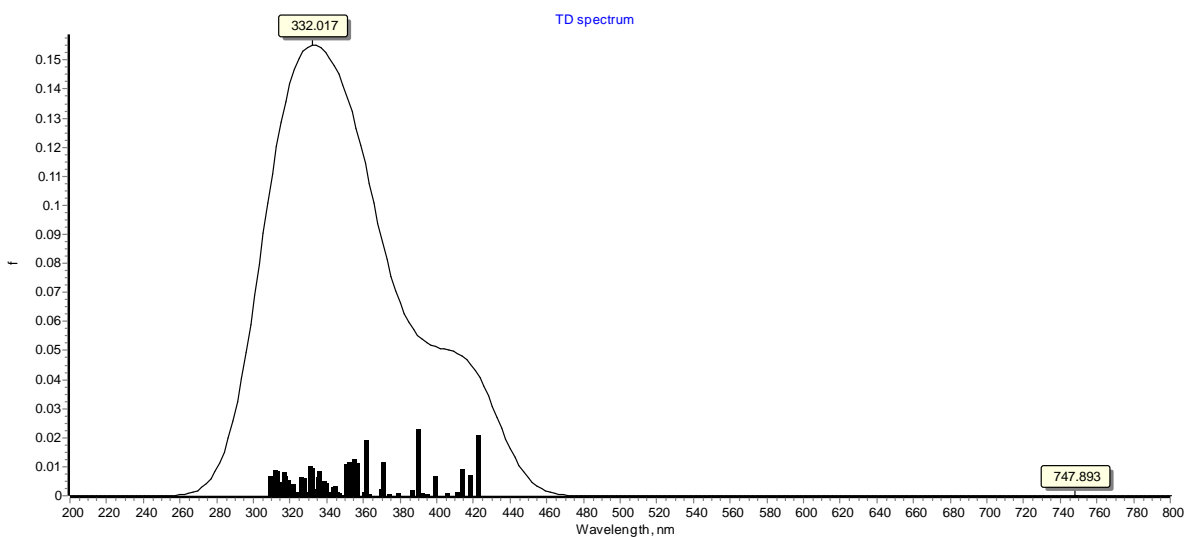

**Figure S24.** TD spectrum for **3** ( $s=1$ )

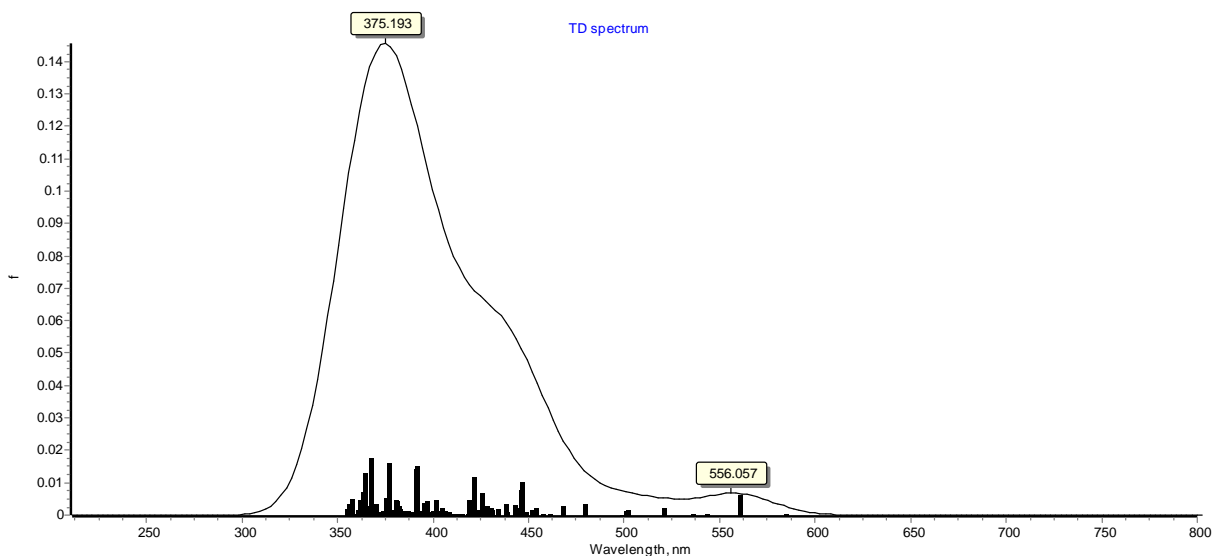

**Figure S25.** TD spectrum for 4 (s=1)

Optimized geometries

**L<sub>2</sub>UCl<sub>2</sub>, 1 (s=1)**

|   |              |              |             |
|---|--------------|--------------|-------------|
| U | 3.014177000  | 5.330403000  | 7.150185000 |
| P | 4.939630000  | 7.906904000  | 6.561850000 |
| N | 3.260362000  | 7.477985000  | 6.501258000 |
| N | 0.621402000  | 6.672680000  | 6.918236000 |
| C | 0.972186000  | 8.107981000  | 6.963406000 |
| H | 1.195911000  | 8.354816000  | 8.006017000 |
| H | 0.112371000  | 8.720203000  | 6.645122000 |
| C | -0.331293000 | 6.384258000  | 8.002008000 |
| H | -0.634844000 | 5.336594000  | 7.954716000 |
| H | -1.230125000 | 7.014398000  | 7.912414000 |
| H | 0.137959000  | 6.575339000  | 8.969793000 |
| C | 5.490019000  | 8.505433000  | 4.833801000 |
| H | 6.546667000  | 8.751373000  | 5.011434000 |
| C | 2.200318000  | 8.404719000  | 6.120951000 |
| H | 1.964242000  | 8.317548000  | 5.049884000 |
| H | 2.480163000  | 9.452761000  | 6.290241000 |
| C | 5.046200000  | 9.529196000  | 7.547041000 |
| H | 4.395066000  | 10.260900000 | 7.052122000 |
| C | 4.560437000  | 9.339792000  | 8.981473000 |
| H | 3.530697000  | 8.977543000  | 9.026572000 |
| H | 4.607631000  | 10.295199000 | 9.520206000 |
| H | 5.184819000  | 8.621189000  | 9.523761000 |
| C | 5.445229000  | 7.355758000  | 3.830035000 |
| H | 6.006955000  | 6.484471000  | 4.180108000 |
| H | 5.881690000  | 7.670152000  | 2.873088000 |



|   |              |              |              |
|---|--------------|--------------|--------------|
| H | 4.418958000  | 7.028787000  | 3.638904000  |
| C | 4.794981000  | 9.746705000  | 4.273529000  |
| H | 3.745643000  | 9.547496000  | 4.034644000  |
| H | 5.285480000  | 10.055897000 | 3.340946000  |
| H | 4.831797000  | 10.602927000 | 4.953598000  |
| C | -0.019688000 | 6.340564000  | 5.634020000  |
| H | 0.649672000  | 6.561073000  | 4.801371000  |
| H | -0.952461000 | 6.911608000  | 5.503805000  |
| H | -0.254822000 | 5.273884000  | 5.609803000  |
| C | 6.482856000  | 10.059299000 | 7.524890000  |
| H | 7.189658000  | 9.319900000  | 7.921789000  |
| H | 6.560981000  | 10.955001000 | 8.153886000  |
| H | 6.817342000  | 10.338746000 | 6.521374000  |
| P | 1.088767000  | 2.753972000  | 7.738639000  |
| N | 2.768051000  | 3.182870000  | 7.799153000  |
| N | 5.407072000  | 3.988221000  | 7.382192000  |
| C | 5.056330000  | 2.552890000  | 7.337252000  |
| H | 4.832793000  | 2.305835000  | 6.294653000  |
| H | 5.916142000  | 1.940784000  | 7.655776000  |
| C | 6.360462000  | 4.276288000  | 6.298931000  |
| H | 6.664012000  | 5.323960000  | 6.346079000  |
| H | 7.259233000  | 3.646165000  | 6.389298000  |
| H | 5.891840000  | 4.084908000  | 5.330900000  |
| C | 0.538397000  | 2.155466000  | 9.466688000  |
| H | -0.518278000 | 1.909627000  | 9.289073000  |
| C | 3.828088000  | 2.256181000  | 8.179593000  |
| H | 4.064061000  | 2.343441000  | 9.250675000  |
| H | 3.548283000  | 1.208118000  | 8.010369000  |
| C | 0.982160000  | 1.131685000  | 6.753449000  |
| H | 1.633267000  | 0.399951000  | 7.248359000  |
| C | 1.467942000  | 1.321110000  | 5.319027000  |
| H | 2.497708000  | 1.683287000  | 5.273953000  |
| H | 1.420684000  | 0.365728000  | 4.780254000  |
| H | 0.843614000  | 2.039782000  | 4.776769000  |
| C | 0.583314000  | 3.305134000  | 10.470459000 |
| H | 0.021769000  | 4.176521000  | 10.120339000 |
| H | 0.146727000  | 2.990822000  | 11.427376000 |
| H | 1.609632000  | 3.631913000  | 10.661673000 |
| C | 1.233335000  | 0.914123000  | 10.026919000 |
| H | 2.282691000  | 1.113240000  | 10.265795000 |
| H | 0.742819000  | 0.604939000  | 10.959496000 |
| H | 1.196444000  | 0.057933000  | 9.346813000  |
| C | 6.047352000  | 4.320765000  | 8.666701000  |
| H | 5.377475000  | 4.100540000  | 9.499010000  |

|    |              |              |             |
|----|--------------|--------------|-------------|
| H  | 6.980038000  | 3.749748000  | 8.797678000 |
| H  | 6.282488000  | 5.387448000  | 8.690716000 |
| C  | -0.454512000 | 0.601627000  | 6.775578000 |
| H  | -1.161284000 | 1.341058000  | 6.378683000 |
| H  | -0.532662000 | -0.294064000 | 6.146570000 |
| H  | -0.789017000 | 0.322178000  | 7.779087000 |
| Cl | 2.950046000  | 4.627551000  | 4.530210000 |
| Cl | 3.077830000  | 6.033423000  | 9.770126000 |

**L<sub>2</sub>U(N<sub>3</sub>)<sub>2</sub>, 2 (s=1)**

|   |              |              |              |
|---|--------------|--------------|--------------|
| U | 3.013501000  | 5.329968000  | 7.148604000  |
| P | 4.819786000  | 7.832078000  | 6.457856000  |
| N | 3.133796000  | 7.494340000  | 6.470076000  |
| N | 2.691782000  | 6.028733000  | 9.379503000  |
| N | 0.563555000  | 6.604028000  | 6.846039000  |
| N | 2.248108000  | 6.780517000  | 10.196537000 |
| C | 0.836977000  | 8.050179000  | 6.958027000  |
| H | 0.998069000  | 8.264392000  | 8.019449000  |
| H | -0.038434000 | 8.634183000  | 6.627628000  |
| C | -0.495384000 | 6.253168000  | 7.802492000  |
| H | -0.696993000 | 5.181840000  | 7.753148000  |
| H | -1.424802000 | 6.802681000  | 7.582217000  |
| H | -0.180502000 | 6.505290000  | 8.818059000  |
| C | 5.327251000  | 8.474160000  | 4.735996000  |
| H | 6.414718000  | 8.595354000  | 4.841832000  |
| C | 2.078819000  | 8.451490000  | 6.178150000  |
| H | 1.857571000  | 8.487358000  | 5.100706000  |
| H | 2.345855000  | 9.476588000  | 6.471514000  |
| N | 1.821510000  | 7.495526000  | 11.002640000 |
| C | 5.102658000  | 9.358658000  | 7.546654000  |
| H | 4.553524000  | 10.199004000 | 7.104673000  |
| C | 4.569851000  | 9.121120000  | 8.957319000  |
| H | 3.489428000  | 8.955923000  | 8.965413000  |
| H | 4.776149000  | 9.993621000  | 9.589848000  |
| H | 5.046639000  | 8.254027000  | 9.429998000  |
| C | 5.079572000  | 7.399645000  | 3.678626000  |
| H | 5.574322000  | 6.456775000  | 3.931000000  |
| H | 5.466867000  | 7.728649000  | 2.706071000  |
| H | 4.011378000  | 7.192593000  | 3.556718000  |
| C | 4.732930000  | 9.816611000  | 4.309624000  |
| H | 3.650556000  | 9.751452000  | 4.160026000  |
| H | 5.172945000  | 10.131104000 | 3.353959000  |
| H | 4.927497000  | 10.616858000 | 5.029906000  |
| C | 0.115751000  | 6.254371000  | 5.490597000  |

|   |              |              |              |
|---|--------------|--------------|--------------|
| H | 0.892554000  | 6.483717000  | 4.757563000  |
| H | -0.801005000 | 6.800466000  | 5.216180000  |
| H | -0.092905000 | 5.182083000  | 5.444816000  |
| C | 6.595038000  | 9.699735000  | 7.567455000  |
| H | 7.190403000  | 8.859085000  | 7.944649000  |
| H | 6.779813000  | 10.554101000 | 8.230469000  |
| H | 6.981801000  | 9.966155000  | 6.578651000  |
| P | 1.208865000  | 2.828972000  | 7.846243000  |
| N | 2.894849000  | 3.166239000  | 7.829510000  |
| N | 3.335534000  | 4.631206000  | 4.917855000  |
| N | 5.464032000  | 4.056843000  | 7.450043000  |
| N | 3.777868000  | 3.879005000  | 4.100444000  |
| C | 5.190938000  | 2.610628000  | 7.338203000  |
| H | 5.028748000  | 2.396490000  | 6.276932000  |
| H | 6.066899000  | 2.026857000  | 7.667554000  |
| C | 6.522498000  | 4.407882000  | 6.493137000  |
| H | 6.724073000  | 5.479208000  | 6.542569000  |
| H | 7.452069000  | 3.858449000  | 6.712964000  |
| H | 6.207156000  | 4.155751000  | 5.477707000  |
| C | 0.704885000  | 2.186182000  | 9.568822000  |
| H | -0.382610000 | 2.063933000  | 9.464521000  |
| C | 3.950135000  | 2.208868000  | 8.119479000  |
| H | 4.172827000  | 2.172337000  | 9.196596000  |
| H | 3.682644000  | 1.183975000  | 7.825808000  |
| N | 4.203250000  | 3.163576000  | 3.294103000  |
| C | 0.923365000  | 1.302829000  | 6.757363000  |
| H | 1.472609000  | 0.461906000  | 7.198117000  |
| C | 1.454453000  | 1.540688000  | 5.346086000  |
| H | 2.535072000  | 1.704536000  | 5.336548000  |
| H | 1.246145000  | 0.668933000  | 4.713186000  |
| H | 0.978136000  | 2.408767000  | 4.874720000  |
| C | 0.952940000  | 3.260556000  | 10.626257000 |
| H | 0.455743000  | 4.202604000  | 10.375606000 |
| H | 0.568418000  | 2.930228000  | 11.599465000 |
| H | 2.021011000  | 3.469500000  | 10.745929000 |
| C | 1.301027000  | 0.844107000  | 9.993839000  |
| H | 2.383514000  | 0.910162000  | 10.142087000 |
| H | 0.862537000  | 0.528771000  | 10.949929000 |
| H | 1.106239000  | 0.044018000  | 9.273438000  |
| C | 5.912169000  | 4.406761000  | 8.805307000  |
| H | 5.135611000  | 4.177325000  | 9.538569000  |
| H | 6.829120000  | 3.860888000  | 9.079539000  |
| H | 6.120543000  | 5.479104000  | 8.850882000  |
| C | -0.569230000 | 0.962576000  | 6.738408000  |

|   |              |             |             |
|---|--------------|-------------|-------------|
| H | -1.164718000 | 1.803810000 | 6.362719000 |
| H | -0.755428000 | 0.108789000 | 6.075039000 |
| H | -0.954713000 | 0.695566000 | 7.727552000 |

**[L<sub>2</sub>U(N<sub>3</sub>)<sub>2</sub>]<sub>2</sub>, 3 (s=2)**

|   |              |              |              |
|---|--------------|--------------|--------------|
| U | 10.264604000 | 2.132074000  | 14.870857000 |
| P | 8.185030000  | 4.177367000  | 16.118740000 |
| P | 12.134567000 | 0.194193000  | 13.262397000 |
| N | 8.408266000  | 2.459377000  | 16.107083000 |
| N | 12.097670000 | 1.891751000  | 13.570795000 |
| N | 11.322399000 | 4.589641000  | 13.639963000 |
| N | 8.594501000  | -0.161973000 | 15.234610000 |
| N | 11.827301000 | 0.647961000  | 17.703032000 |
| N | 8.981150000  | 2.276137000  | 12.945687000 |
| N | 11.826903000 | 3.520453000  | 17.703396000 |
| N | 11.543692000 | 3.542281000  | 16.561900000 |
| C | 12.261512000 | 0.019448000  | 11.374133000 |
| H | 13.146381000 | 0.595381000  | 11.070338000 |
| N | 11.206408000 | 0.618418000  | 16.705857000 |
| C | 9.258050000  | -1.471964000 | 15.263848000 |
| H | 9.685557000  | -1.690029000 | 14.282909000 |
| H | 8.545625000  | -2.272659000 | 15.523057000 |
| H | 10.064730000 | -1.462026000 | 15.999347000 |
| C | 11.234484000 | 5.836187000  | 14.408114000 |
| H | 10.188357000 | 6.130086000  | 14.515139000 |
| H | 11.778767000 | 6.653387000  | 13.904958000 |
| H | 11.656002000 | 5.687269000  | 15.403662000 |
| C | 8.017400000  | 0.105805000  | 16.563669000 |
| H | 8.825571000  | -0.016099000 | 17.290011000 |
| H | 7.232329000  | -0.632868000 | 16.802075000 |
| C | 12.742393000 | 4.227465000  | 13.493988000 |
| H | 13.173927000 | 4.215209000  | 14.499859000 |
| H | 13.280156000 | 4.989802000  | 12.902592000 |
| C | 10.708174000 | 4.821907000  | 12.327597000 |
| H | 10.749179000 | 3.922767000  | 11.712076000 |
| H | 11.215288000 | 5.641107000  | 11.789670000 |
| H | 9.658246000  | 5.093006000  | 12.461592000 |
| C | 6.388579000  | 4.501457000  | 15.598187000 |
| H | 5.733404000  | 4.030020000  | 16.341074000 |
| C | 13.851626000 | -0.458077000 | 13.797166000 |
| H | 14.490577000 | -0.433487000 | 12.904401000 |
| N | 8.295218000  | 2.404449000  | 11.979917000 |
| C | 8.232652000  | 4.679744000  | 17.962233000 |
| H | 8.954630000  | 3.954238000  | 18.359964000 |

|   |              |              |              |
|---|--------------|--------------|--------------|
| C | 7.537171000  | -0.211063000 | 14.216692000 |
| H | 7.025056000  | 0.748428000  | 14.146112000 |
| H | 6.796522000  | -0.993141000 | 14.453694000 |
| H | 7.976647000  | -0.432754000 | 13.241424000 |
| C | 7.457733000  | 1.517803000  | 16.673894000 |
| H | 6.482377000  | 1.583212000  | 16.166933000 |
| H | 7.265290000  | 1.710380000  | 17.739051000 |
| C | 6.119222000  | 6.008792000  | 15.578566000 |
| H | 6.233405000  | 6.477635000  | 16.559981000 |
| H | 5.092637000  | 6.203646000  | 15.242739000 |
| H | 6.793722000  | 6.522256000  | 14.882602000 |
| C | 8.838338000  | 6.078596000  | 18.110146000 |
| H | 9.810481000  | 6.150895000  | 17.612310000 |
| H | 8.983074000  | 6.326892000  | 19.169202000 |
| H | 8.190072000  | 6.851680000  | 17.682309000 |
| C | 12.925429000 | 2.855266000  | 12.865259000 |
| H | 12.673090000 | 2.890555000  | 11.794435000 |
| H | 13.995208000 | 2.602642000  | 12.915456000 |
| C | 6.931021000  | 4.549403000  | 18.754998000 |
| H | 6.172627000  | 5.265486000  | 18.421074000 |
| H | 7.118931000  | 4.756448000  | 19.816991000 |
| H | 6.494797000  | 3.548302000  | 18.691390000 |
| C | 13.709707000 | -1.906544000 | 14.273702000 |
| H | 13.116594000 | -1.954900000 | 15.194664000 |
| H | 14.694628000 | -2.340690000 | 14.489012000 |
| H | 13.220708000 | -2.549742000 | 13.535219000 |
| C | 6.099749000  | 3.896906000  | 14.226268000 |
| H | 6.725057000  | 4.352408000  | 13.450382000 |
| H | 5.052883000  | 4.076844000  | 13.949941000 |
| H | 6.269342000  | 2.817507000  | 14.202160000 |
| C | 11.026828000 | 0.604749000  | 10.694300000 |
| H | 10.123314000 | 0.045608000  | 10.963585000 |
| H | 11.134279000 | 0.552749000  | 9.603475000  |
| H | 10.862534000 | 1.650461000  | 10.966005000 |
| N | 7.630464000  | 2.523969000  | 11.037489000 |
| C | 12.466247000 | -1.439424000 | 10.961639000 |
| H | 13.408490000 | -1.855211000 | 11.330464000 |
| H | 12.485534000 | -1.518231000 | 9.867208000  |
| H | 11.649279000 | -2.077983000 | 11.318659000 |
| C | 14.488295000 | 0.401119000  | 14.885389000 |
| H | 14.704349000 | 1.417400000  | 14.546951000 |
| H | 15.435740000 | -0.051300000 | 15.205227000 |
| H | 13.840214000 | 0.476228000  | 15.764102000 |
| N | 12.448408000 | 0.623302000  | 18.700124000 |

|   |              |              |              |
|---|--------------|--------------|--------------|
| N | 12.110183000 | 3.547676000  | 18.844848000 |
| U | 13.389076000 | 2.137322000  | 20.535905000 |
| P | 15.469983000 | 4.182527000  | 19.291263000 |
| P | 11.518254000 | 0.198724000  | 22.143855000 |
| N | 15.245883000 | 2.464711000  | 19.300163000 |
| N | 11.556334000 | 1.896376000  | 21.835859000 |
| N | 12.330709000 | 4.594141000  | 21.767023000 |
| N | 15.058688000 | -0.156734000 | 20.173244000 |
| N | 14.680102000 | 2.292281000  | 22.454506000 |
| C | 11.389348000 | 0.024742000  | 24.031909000 |
| H | 10.504530000 | 0.601229000  | 24.334747000 |
| C | 14.395192000 | -1.466766000 | 20.142991000 |
| H | 13.966843000 | -1.685232000 | 21.123476000 |
| H | 15.107849000 | -2.267313000 | 19.884034000 |
| H | 13.589067000 | -1.456504000 | 19.406851000 |
| C | 12.419866000 | 5.840844000  | 20.999250000 |
| H | 13.466113000 | 6.135363000  | 20.895045000 |
| H | 11.873874000 | 6.657662000  | 21.501179000 |
| H | 12.001113000 | 5.691933000  | 20.002531000 |
| C | 15.636911000 | 0.111330000  | 18.844697000 |
| H | 14.828900000 | -0.009380000 | 18.117980000 |
| H | 16.421527000 | -0.627865000 | 18.606443000 |
| C | 10.910515000 | 4.231978000  | 21.910991000 |
| H | 10.480225000 | 4.219842000  | 20.904586000 |
| H | 10.371924000 | 4.994221000  | 22.501766000 |
| C | 12.942833000 | 4.826244000  | 23.080408000 |
| H | 12.899940000 | 3.927295000  | 23.696053000 |
| H | 12.435334000 | 5.645973000  | 23.617179000 |
| H | 13.993288000 | 5.095986000  | 22.948188000 |
| C | 17.265286000 | 4.506630000  | 19.816714000 |
| H | 17.922228000 | 4.036845000  | 19.074327000 |
| C | 9.801446000  | -0.452743000 | 21.607313000 |
| H | 9.161473000  | -0.427072000 | 22.499314000 |
| N | 15.343732000 | 2.371965000  | 23.440764000 |
| C | 15.427773000 | 4.686160000  | 17.447984000 |
| H | 14.707351000 | 3.960384000  | 17.047972000 |
| C | 16.115171000 | -0.206090000 | 21.192033000 |
| H | 16.625858000 | 0.753984000  | 21.264758000 |
| H | 16.857121000 | -0.986763000 | 20.954442000 |
| H | 15.675297000 | -0.430690000 | 22.166499000 |
| C | 16.197444000 | 1.523026000  | 18.735460000 |
| H | 17.171786000 | 1.588102000  | 19.244462000 |
| H | 16.392176000 | 1.715258000  | 17.670659000 |
| C | 17.533266000 | 6.014187000  | 19.838579000 |

|   |              |              |              |
|---|--------------|--------------|--------------|
| H | 17.419823000 | 6.484174000  | 18.857621000 |
| H | 18.559277000 | 6.209547000  | 20.175872000 |
| H | 16.857443000 | 6.526163000  | 20.534355000 |
| C | 14.821569000 | 6.084603000  | 17.298464000 |
| H | 13.848179000 | 6.156248000  | 17.793978000 |
| H | 14.679031000 | 6.332494000  | 16.239004000 |
| H | 15.468235000 | 6.858314000  | 17.727589000 |
| C | 10.726842000 | 2.859795000  | 22.539598000 |
| H | 10.977229000 | 2.895363000  | 23.610868000 |
| H | 9.657288000  | 2.606680000  | 22.487536000 |
| C | 16.731786000 | 4.556515000  | 16.659027000 |
| H | 17.488995000 | 5.272709000  | 16.995419000 |
| H | 16.546984000 | 4.763753000  | 15.596530000 |
| H | 17.168058000 | 3.555488000  | 16.723701000 |
| C | 9.943074000  | -1.901693000 | 21.132190000 |
| H | 10.537254000 | -1.951228000 | 20.211979000 |
| H | 8.958158000  | -2.335444000 | 20.916065000 |
| H | 10.430784000 | -2.544539000 | 21.871832000 |
| C | 17.553354000 | 3.900608000  | 21.188283000 |
| H | 16.925808000 | 4.352997000  | 21.964204000 |
| H | 18.599515000 | 4.082705000  | 21.465980000 |
| H | 17.386331000 | 2.820817000  | 21.210383000 |
| C | 12.624003000 | 0.610540000  | 24.711193000 |
| H | 13.527371000 | 0.050543000  | 24.442994000 |
| H | 12.516722000 | 0.560456000  | 25.802090000 |
| H | 12.788138000 | 1.655937000  | 24.437912000 |
| N | 15.989840000 | 2.446051000  | 24.400662000 |
| C | 11.184090000 | -1.433693000 | 24.445498000 |
| H | 10.241843000 | -1.849458000 | 24.076643000 |
| H | 11.164377000 | -1.511577000 | 25.539987000 |
| H | 12.001010000 | -2.072800000 | 24.089339000 |
| C | 9.166393000  | 0.405887000  | 20.517738000 |
| H | 8.950837000  | 1.422653000  | 20.855003000 |
| H | 8.218756000  | -0.046201000 | 20.197843000 |
| H | 9.815058000  | 0.479552000  | 19.639347000 |

**[L<sub>2</sub>U(N<sub>3</sub>)<sub>2</sub>]<sub>2</sub>, 3 (s=1)**

|   |              |              |              |
|---|--------------|--------------|--------------|
| U | 10.258261000 | 2.170336000  | 14.866773000 |
| P | 8.195060000  | 4.201623000  | 16.094353000 |
| P | 12.111422000 | 0.182349000  | 13.307487000 |
| N | 8.402553000  | 2.484798000  | 16.107088000 |
| N | 12.110317000 | 1.881471000  | 13.597699000 |
| N | 11.352928000 | 4.557053000  | 13.646269000 |
| N | 8.593139000  | -0.148112000 | 15.259866000 |

|   |              |              |              |
|---|--------------|--------------|--------------|
| N | 11.839613000 | 0.690662000  | 17.697862000 |
| N | 8.972313000  | 2.261784000  | 12.929211000 |
| N | 11.826074000 | 3.550361000  | 17.711703000 |
| N | 11.543399000 | 3.568203000  | 16.572587000 |
| C | 12.250462000 | -0.021556000 | 11.422867000 |
| H | 13.156904000 | 0.520810000  | 11.120555000 |
| N | 11.195387000 | 0.646865000  | 16.715212000 |
| C | 9.252141000  | -1.459595000 | 15.311591000 |
| H | 9.686324000  | -1.693166000 | 14.337239000 |
| H | 8.534773000  | -2.253913000 | 15.577094000 |
| H | 10.052535000 | -1.440276000 | 16.053515000 |
| C | 11.258834000 | 5.816660000  | 14.395495000 |
| H | 10.212163000 | 6.112083000  | 14.490420000 |
| H | 11.806173000 | 6.624182000  | 13.881162000 |
| H | 11.675134000 | 5.684584000  | 15.395352000 |
| C | 8.011918000  | 0.136604000  | 16.583635000 |
| H | 8.819237000  | 0.027172000  | 17.312653000 |
| H | 7.227890000  | -0.600635000 | 16.830058000 |
| C | 12.776907000 | 4.201656000  | 13.509786000 |
| H | 13.203663000 | 4.197489000  | 14.517631000 |
| H | 13.311968000 | 4.962845000  | 12.915593000 |
| C | 10.745991000 | 4.774739000  | 12.326204000 |
| H | 10.792464000 | 3.868938000  | 11.721674000 |
| H | 11.256262000 | 5.589421000  | 11.785361000 |
| H | 9.694800000  | 5.044042000  | 12.451495000 |
| C | 6.406139000  | 4.540376000  | 15.560865000 |
| H | 5.744988000  | 4.085187000  | 16.308557000 |
| C | 13.809505000 | -0.502915000 | 13.861564000 |
| H | 14.448167000 | -0.516164000 | 12.968290000 |
| N | 8.260645000  | 2.281416000  | 11.972677000 |
| C | 8.249357000  | 4.729448000  | 17.928982000 |
| H | 8.968214000  | 4.005237000  | 18.334160000 |
| C | 7.539608000  | -0.208297000 | 14.239033000 |
| H | 7.033835000  | 0.753055000  | 14.149197000 |
| H | 6.792566000  | -0.980999000 | 14.486808000 |
| H | 7.981690000  | -0.451351000 | 13.270077000 |
| C | 7.447907000  | 1.547701000  | 16.674215000 |
| H | 6.477697000  | 1.607075000  | 16.157071000 |
| H | 7.246189000  | 1.752456000  | 17.735173000 |
| C | 6.152013000  | 6.049888000  | 15.521783000 |
| H | 6.266843000  | 6.528939000  | 16.498159000 |
| H | 5.128495000  | 6.249893000  | 15.179965000 |
| H | 6.833680000  | 6.548476000  | 14.822048000 |
| C | 8.860230000  | 6.127369000  | 18.062277000 |



|   |              |              |              |
|---|--------------|--------------|--------------|
| H | 9.834364000  | 6.190142000  | 17.567286000 |
| H | 9.002686000  | 6.385342000  | 19.119268000 |
| H | 8.216504000  | 6.898868000  | 17.625068000 |
| C | 12.959506000 | 2.825477000  | 12.892561000 |
| H | 12.720985000 | 2.854296000  | 11.818407000 |
| H | 14.025339000 | 2.561524000  | 12.959403000 |
| C | 6.946316000  | 4.611914000  | 18.721459000 |
| H | 6.191399000  | 5.328442000  | 18.380702000 |
| H | 7.135144000  | 4.827413000  | 19.781516000 |
| H | 6.506289000  | 3.612018000  | 18.666523000 |
| C | 13.628202000 | -1.936185000 | 14.369410000 |
| H | 13.036577000 | -1.948455000 | 15.292240000 |
| H | 14.601148000 | -2.393182000 | 14.591685000 |
| H | 13.119422000 | -2.580685000 | 13.645448000 |
| C | 6.114685000  | 3.919228000  | 14.196998000 |
| H | 6.744839000  | 4.358528000  | 13.415775000 |
| H | 5.069603000  | 4.104349000  | 13.917642000 |
| H | 6.274796000  | 2.838172000  | 14.188492000 |
| C | 11.042870000 | 0.589057000  | 10.717601000 |
| H | 10.121463000 | 0.054723000  | 10.975598000 |
| H | 11.168016000 | 0.524170000  | 9.629369000  |
| H | 10.900045000 | 1.640828000  | 10.977537000 |
| N | 7.571430000  | 2.300606000  | 11.040702000 |
| C | 12.412278000 | -1.493177000 | 11.036794000 |
| H | 13.334343000 | -1.934807000 | 11.425913000 |
| H | 12.443341000 | -1.590491000 | 9.944165000  |
| H | 11.568848000 | -2.096987000 | 11.392859000 |
| C | 14.471518000 | 0.363673000  | 14.928561000 |
| H | 14.721019000 | 1.362912000  | 14.563496000 |
| H | 15.403812000 | -0.110277000 | 15.261566000 |
| H | 13.825666000 | 0.482851000  | 15.803586000 |
| N | 12.483700000 | 0.678753000  | 18.682568000 |
| N | 12.109461000 | 3.580713000  | 18.854432000 |
| U | 13.396248000 | 2.194234000  | 20.524965000 |
| P | 15.453299000 | 4.218657000  | 19.304424000 |
| P | 11.530039000 | 0.178144000  | 22.093267000 |
| N | 15.251793000 | 2.500592000  | 19.291463000 |
| N | 11.565695000 | 1.883968000  | 21.822033000 |
| N | 12.296013000 | 4.570942000  | 21.795991000 |
| N | 15.087640000 | -0.129350000 | 20.162201000 |
| N | 14.682986000 | 2.266653000  | 22.458908000 |
| C | 11.410220000 | -0.029302000 | 23.980624000 |
| H | 10.531691000 | 0.547078000  | 24.301524000 |
| C | 14.425638000 | -1.439278000 | 20.121366000 |

|   |              |              |              |
|---|--------------|--------------|--------------|
| H | 14.011918000 | -1.673905000 | 21.104419000 |
| H | 15.135151000 | -2.235335000 | 19.839713000 |
| H | 13.608588000 | -1.417514000 | 19.397585000 |
| C | 12.371871000 | 5.831819000  | 21.048647000 |
| H | 13.415741000 | 6.131580000  | 20.935284000 |
| H | 11.831134000 | 6.637513000  | 21.573225000 |
| H | 11.938734000 | 5.700117000  | 20.055785000 |
| C | 15.655564000 | 0.151213000  | 18.831593000 |
| H | 14.843228000 | 0.029283000  | 18.110306000 |
| H | 16.443399000 | -0.581774000 | 18.583973000 |
| C | 10.879435000 | 4.199905000  | 21.950141000 |
| H | 10.436514000 | 4.203467000  | 20.949342000 |
| H | 10.344691000 | 4.947569000  | 22.562140000 |
| C | 12.921761000 | 4.785553000  | 23.107037000 |
| H | 12.897708000 | 3.874275000  | 23.704911000 |
| H | 12.412055000 | 5.590586000  | 23.663089000 |
| H | 13.967939000 | 5.066987000  | 22.966510000 |
| C | 17.244393000 | 4.564470000  | 19.825184000 |
| H | 17.903957000 | 4.112128000  | 19.074317000 |
| C | 9.802280000  | -0.453476000 | 21.564179000 |
| H | 9.166020000  | -0.428639000 | 22.458923000 |
| N | 15.515130000 | 2.184934000  | 23.308886000 |
| C | 15.383956000 | 4.752904000  | 17.471952000 |
| H | 14.661472000 | 4.029848000  | 17.070806000 |
| C | 16.152104000 | -0.188927000 | 21.170414000 |
| H | 16.669775000 | 0.767688000  | 21.243677000 |
| H | 16.890561000 | -0.969747000 | 20.921685000 |
| H | 15.720587000 | -0.420858000 | 22.146932000 |
| C | 16.207710000 | 1.566801000  | 18.721999000 |
| H | 17.183408000 | 1.638412000  | 19.227343000 |
| H | 16.397016000 | 1.761739000  | 17.656530000 |
| C | 17.493586000 | 6.074768000  | 19.864466000 |
| H | 17.374300000 | 6.553948000  | 18.888686000 |
| H | 18.517365000 | 6.278327000  | 20.203509000 |
| H | 16.812174000 | 6.570663000  | 20.566421000 |
| C | 14.770672000 | 6.150762000  | 17.348615000 |
| H | 13.802753000 | 6.211349000  | 17.856111000 |
| H | 14.614826000 | 6.411653000  | 16.294172000 |
| H | 15.418926000 | 6.921806000  | 17.779895000 |
| C | 10.720964000 | 2.814063000  | 22.552038000 |
| H | 10.977417000 | 2.833521000  | 23.622540000 |
| H | 9.655795000  | 2.542784000  | 22.501603000 |
| C | 16.679365000 | 4.637395000  | 16.666963000 |
| H | 17.438295000 | 5.351626000  | 17.003756000 |

|   |              |              |              |
|---|--------------|--------------|--------------|
| H | 16.481891000 | 4.857048000  | 15.609258000 |
| H | 17.118140000 | 3.636519000  | 16.714733000 |
| C | 9.927811000  | -1.900302000 | 21.077504000 |
| H | 10.517526000 | -1.948575000 | 20.154364000 |
| H | 8.937794000  | -2.322907000 | 20.862111000 |
| H | 10.412504000 | -2.554181000 | 21.809276000 |
| C | 17.543349000 | 3.943274000  | 21.187205000 |
| H | 16.907475000 | 4.372598000  | 21.969546000 |
| H | 18.586095000 | 4.139048000  | 21.468061000 |
| H | 17.396149000 | 2.860424000  | 21.192205000 |
| C | 12.652674000 | 0.534979000  | 24.664198000 |
| H | 13.550403000 | -0.027886000 | 24.383111000 |
| H | 12.549743000 | 0.467245000  | 25.754753000 |
| H | 12.825678000 | 1.583032000  | 24.406787000 |
| N | 16.317576000 | 2.108409000  | 24.141827000 |
| C | 11.197076000 | -1.493208000 | 24.370366000 |
| H | 10.245841000 | -1.892963000 | 24.006892000 |
| H | 11.191411000 | -1.591598000 | 25.463461000 |
| H | 12.002611000 | -2.133599000 | 23.991083000 |
| C | 9.170197000  | 0.416735000  | 20.482251000 |
| H | 8.969125000  | 1.434995000  | 20.823830000 |
| H | 8.215162000  | -0.022694000 | 20.166385000 |
| H | 9.813948000  | 0.485503000  | 19.599799000 |

**[L<sub>2</sub>U(N<sub>3</sub>)<sub>2</sub>]<sub>2</sub>, 3 (s=0), open-shell singlet**

|   |              |              |              |
|---|--------------|--------------|--------------|
| U | 10.270280000 | 2.098229000  | 14.870721000 |
| U | 13.411011000 | 2.234087000  | 20.524627000 |
| N | 8.956870000  | 2.230334000  | 12.965361000 |
| N | 8.260535000  | 2.360954000  | 12.007429000 |
| N | 7.585611000  | 2.482628000  | 11.072539000 |
| N | 11.864260000 | 3.550176000  | 17.677184000 |
| N | 11.571824000 | 3.537124000  | 16.540573000 |
| N | 12.156312000 | 3.610538000  | 18.816763000 |
| N | 11.876461000 | 0.681644000  | 17.677869000 |
| N | 11.247577000 | 0.618051000  | 16.684088000 |
| N | 12.503974000 | 0.690546000  | 18.669106000 |
| N | 14.669300000 | 2.294002000  | 22.476776000 |
| N | 15.474928000 | 2.134176000  | 23.341377000 |
| N | 16.252110000 | 1.982421000  | 24.187410000 |
| P | 8.200336000  | 4.150020000  | 16.141803000 |
| N | 8.428976000  | 2.431955000  | 16.129065000 |
| N | 8.605115000  | -0.191597000 | 15.256379000 |
| C | 9.272723000  | -1.499649000 | 15.279713000 |
| H | 9.688287000  | -1.718811000 | 14.293876000 |

|   |              |              |              |
|---|--------------|--------------|--------------|
| H | 8.565714000  | -2.301713000 | 15.549433000 |
| H | 10.088139000 | -1.486038000 | 16.005486000 |
| C | 8.047389000  | 0.078092000  | 16.593391000 |
| H | 8.866877000  | -0.041973000 | 17.307129000 |
| H | 7.266918000  | -0.661182000 | 16.844881000 |
| C | 6.395467000  | 4.469506000  | 15.648596000 |
| H | 5.751752000  | 3.994884000  | 16.399464000 |
| C | 8.277347000  | 4.654090000  | 17.984228000 |
| H | 9.007613000  | 3.930638000  | 18.370809000 |
| C | 7.532966000  | -0.246042000 | 14.254406000 |
| H | 7.017967000  | 0.712236000  | 14.188179000 |
| H | 6.797762000  | -1.028850000 | 14.505384000 |
| H | 7.958279000  | -0.469907000 | 13.273407000 |
| C | 7.487513000  | 1.489602000  | 16.709740000 |
| H | 6.505150000  | 1.552992000  | 16.216144000 |
| H | 7.309229000  | 1.683539000  | 17.777186000 |
| C | 6.121878000  | 5.976222000  | 15.635081000 |
| H | 6.246740000  | 6.443762000  | 16.615816000 |
| H | 5.090785000  | 6.169036000  | 15.312136000 |
| H | 6.786498000  | 6.492684000  | 14.931885000 |
| C | 8.882268000  | 6.054639000  | 18.119111000 |
| H | 9.845490000  | 6.128138000  | 17.604350000 |
| H | 9.043995000  | 6.306436000  | 19.174861000 |
| H | 8.224939000  | 6.824963000  | 17.700165000 |
| C | 6.990033000  | 4.522347000  | 18.799627000 |
| H | 6.224758000  | 5.236923000  | 18.478527000 |
| H | 7.196041000  | 4.730784000  | 19.858022000 |
| H | 6.554697000  | 3.520417000  | 18.744468000 |
| C | 6.090652000  | 3.866483000  | 14.279377000 |
| H | 6.703145000  | 4.326930000  | 13.496207000 |
| H | 5.039225000  | 4.041771000  | 14.017748000 |
| H | 6.265535000  | 2.788033000  | 14.250394000 |
| P | 12.118813000 | 0.181731000  | 13.249011000 |
| N | 12.081659000 | 1.881864000  | 13.537990000 |
| N | 11.291188000 | 4.578260000  | 13.597867000 |
| C | 12.211424000 | -0.021125000 | 11.361719000 |
| H | 13.092571000 | 0.546817000  | 11.032969000 |
| C | 11.208384000 | 5.829656000  | 14.357129000 |
| H | 10.162060000 | 6.113592000  | 14.487528000 |
| H | 11.732123000 | 6.649114000  | 13.835829000 |
| H | 11.655081000 | 5.694317000  | 15.343640000 |
| C | 12.709795000 | 4.222113000  | 13.429097000 |
| H | 13.161085000 | 4.222964000  | 14.426416000 |
| H | 13.232914000 | 4.980926000  | 12.820013000 |

|   |              |              |              |
|---|--------------|--------------|--------------|
| C | 10.650006000 | 4.792368000  | 12.295902000 |
| H | 10.683878000 | 3.886313000  | 11.690032000 |
| H | 11.141314000 | 5.608241000  | 11.738343000 |
| H | 9.601308000  | 5.058988000  | 12.447474000 |
| C | 13.843205000 | -0.464901000 | 13.765326000 |
| H | 14.467419000 | -0.455016000 | 12.861934000 |
| C | 12.890601000 | 2.844500000  | 12.810447000 |
| H | 12.620171000 | 2.868055000  | 11.743708000 |
| H | 13.962743000 | 2.599335000  | 12.844828000 |
| C | 13.706652000 | -1.905427000 | 14.266903000 |
| H | 13.126689000 | -1.937773000 | 15.196849000 |
| H | 14.694120000 | -2.337299000 | 14.474951000 |
| H | 13.206319000 | -2.559803000 | 13.546029000 |
| C | 10.966914000 | 0.556836000  | 10.693817000 |
| H | 10.066753000 | 0.004813000  | 10.987710000 |
| H | 11.055504000 | 0.486210000  | 9.602345000  |
| H | 10.809965000 | 1.607489000  | 10.950402000 |
| C | 12.403977000 | -1.487260000 | 10.969293000 |
| H | 13.350691000 | -1.900650000 | 11.329138000 |
| H | 12.404595000 | -1.583920000 | 9.876156000  |
| H | 11.590724000 | -2.116422000 | 11.350731000 |
| C | 14.497983000 | 0.410755000  | 14.829562000 |
| H | 14.708459000 | 1.421424000  | 14.471249000 |
| H | 15.450472000 | -0.036343000 | 15.142253000 |
| H | 13.863940000 | 0.499847000  | 15.717037000 |
| P | 15.514112000 | 4.219991000  | 19.333359000 |
| N | 15.291130000 | 2.504635000  | 19.319179000 |
| N | 15.079649000 | -0.126397000 | 20.183423000 |
| C | 14.402790000 | -1.427903000 | 20.133583000 |
| H | 13.968034000 | -1.654246000 | 21.109535000 |
| H | 15.106966000 | -2.233943000 | 19.867205000 |
| H | 13.599131000 | -1.399089000 | 19.395160000 |
| C | 15.671788000 | 0.149289000  | 18.862914000 |
| H | 14.870333000 | 0.040131000  | 18.127139000 |
| H | 16.454077000 | -0.592987000 | 18.625485000 |
| C | 17.294985000 | 4.549399000  | 19.897355000 |
| H | 17.967843000 | 4.098205000  | 19.157750000 |
| C | 15.496664000 | 4.744582000  | 17.496856000 |
| H | 14.785624000 | 4.018697000  | 17.081068000 |
| C | 16.125922000 | -0.196322000 | 21.209540000 |
| H | 16.653155000 | 0.754499000  | 21.290265000 |
| H | 16.860089000 | -0.985638000 | 20.974971000 |
| H | 15.675725000 | -0.422854000 | 22.178940000 |
| C | 16.244344000 | 1.557718000  | 18.766721000 |

|   |              |              |              |
|---|--------------|--------------|--------------|
| H | 17.210574000 | 1.615119000  | 19.291472000 |
| H | 16.457338000 | 1.752426000  | 17.705818000 |
| C | 17.549397000 | 6.058362000  | 19.948970000 |
| H | 17.440718000 | 6.543372000  | 18.974729000 |
| H | 18.570458000 | 6.256392000  | 20.299155000 |
| H | 16.862490000 | 6.552213000  | 20.646969000 |
| C | 14.887867000 | 6.141216000  | 17.343687000 |
| H | 13.911660000 | 6.211040000  | 17.833952000 |
| H | 14.748385000 | 6.384982000  | 16.282765000 |
| H | 15.530729000 | 6.917845000  | 17.773205000 |
| C | 16.814631000 | 4.622016000  | 16.730490000 |
| H | 17.564155000 | 5.337868000  | 17.084491000 |
| H | 16.648014000 | 4.834468000  | 15.666080000 |
| H | 17.250933000 | 3.621083000  | 16.797848000 |
| C | 17.563133000 | 3.918943000  | 21.261555000 |
| H | 16.910329000 | 4.342775000  | 22.032862000 |
| H | 18.599673000 | 4.111786000  | 21.566138000 |
| H | 17.415077000 | 2.836161000  | 21.255546000 |
| P | 11.491928000 | 0.220585000  | 22.084573000 |
| N | 11.549363000 | 1.923357000  | 21.780561000 |
| N | 12.317605000 | 4.601482000  | 21.767589000 |
| C | 11.324402000 | 0.057079000  | 23.972579000 |
| H | 10.451370000 | 0.659272000  | 24.258998000 |
| C | 12.437265000 | 5.862340000  | 21.024679000 |
| H | 13.488473000 | 6.147988000  | 20.950098000 |
| H | 11.888229000 | 6.673863000  | 21.530984000 |
| H | 12.038749000 | 5.737287000  | 20.016602000 |
| C | 10.890748000 | 4.250932000  | 21.872880000 |
| H | 10.483827000 | 4.256955000  | 20.856538000 |
| H | 10.345994000 | 5.008647000  | 22.462983000 |
| C | 12.901252000 | 4.807216000  | 23.099776000 |
| H | 12.844203000 | 3.896369000  | 23.695682000 |
| H | 12.383031000 | 5.618767000  | 23.637827000 |
| H | 13.955095000 | 5.075016000  | 22.995339000 |
| C | 9.767081000  | -0.397549000 | 21.530084000 |
| H | 9.110397000  | -0.340462000 | 22.408374000 |
| C | 10.693445000 | 2.870567000  | 22.476065000 |
| H | 10.913686000 | 2.893676000  | 23.554381000 |
| H | 9.626939000  | 2.613387000  | 22.391469000 |
| C | 9.880597000  | -1.857680000 | 21.081723000 |
| H | 10.490955000 | -1.937828000 | 20.174333000 |
| H | 8.889292000  | -2.269968000 | 20.852851000 |
| H | 10.337307000 | -2.500782000 | 21.840542000 |
| C | 12.563917000 | 0.611457000  | 24.669462000 |

|   |              |              |              |
|---|--------------|--------------|--------------|
| H | 13.454695000 | 0.022401000  | 24.421879000 |
| H | 12.436584000 | 0.574075000  | 25.758879000 |
| H | 12.764896000 | 1.648470000  | 24.389090000 |
| C | 11.070841000 | -1.392265000 | 24.391162000 |
| H | 10.118532000 | -1.779836000 | 24.017338000 |
| H | 11.040452000 | -1.463825000 | 25.485948000 |
| H | 11.869554000 | -2.059451000 | 24.045093000 |
| C | 9.174022000  | 0.455561000  | 20.413286000 |
| H | 8.977390000  | 1.483652000  | 20.726622000 |
| H | 8.221360000  | 0.021029000  | 20.083856000 |
| H | 9.839914000  | 0.497065000  | 19.545870000 |

**[L<sub>4</sub>U<sub>2</sub>(N)<sub>2</sub>], 4 (s=1)**

|   |              |              |              |
|---|--------------|--------------|--------------|
| U | 11.787218000 | 9.627614000  | 13.829560000 |
| U | 11.033893000 | 11.280010000 | 16.577090000 |
| P | 8.439981000  | 9.854338000  | 18.453586000 |
| P | 12.903354000 | 14.136684000 | 17.241778000 |
| P | 11.452348000 | 10.739545000 | 10.546763000 |
| P | 13.158013000 | 6.451585000  | 14.079297000 |
| N | 11.630319000 | 9.453495000  | 15.859206000 |
| N | 9.440459000  | 8.309363000  | 13.723294000 |
| N | 11.196983000 | 11.465638000 | 14.554945000 |
| N | 14.231608000 | 10.725067000 | 13.607401000 |
| C | 11.994924000 | 10.444966000 | 20.215153000 |
| H | 12.013374000 | 11.535388000 | 20.255212000 |
| H | 12.700420000 | 10.059902000 | 20.972679000 |
| H | 10.990925000 | 10.105736000 | 20.480905000 |
| N | 12.857462000 | 12.427559000 | 17.556353000 |
| N | 12.331537000 | 9.968019000  | 18.874605000 |
| N | 10.803704000 | 9.600605000  | 11.672703000 |
| N | 8.760708000  | 11.038947000 | 17.221874000 |
| N | 9.297295000  | 13.532001000 | 15.988016000 |
| N | 13.498016000 | 8.037909000  | 13.471013000 |
| C | 9.754603000  | 14.340083000 | 14.856201000 |
| H | 10.658122000 | 14.885516000 | 15.140265000 |
| H | 8.984280000  | 15.066953000 | 14.544679000 |
| H | 9.998376000  | 13.685620000 | 14.018644000 |
| C | 13.706661000 | 10.334802000 | 18.517543000 |
| H | 13.918874000 | 9.859445000  | 17.554774000 |
| H | 14.425020000 | 9.933029000  | 19.256818000 |
| C | 9.473371000  | 7.690222000  | 12.385678000 |
| H | 8.538747000  | 7.134459000  | 12.194506000 |
| H | 10.295765000 | 6.965353000  | 12.388614000 |
| C | 7.134688000  | 8.662876000  | 17.690810000 |

|   |              |              |              |
|---|--------------|--------------|--------------|
| H | 7.398970000  | 8.711531000  | 16.627592000 |
| C | 13.368210000 | 5.503385000  | 11.424152000 |
| H | 12.274084000 | 5.428964000  | 11.392846000 |
| H | 13.766701000 | 4.773558000  | 10.706830000 |
| H | 13.643808000 | 6.501083000  | 11.073976000 |
| C | 13.897948000 | 11.840367000 | 18.388131000 |
| H | 13.923334000 | 12.297497000 | 19.391787000 |
| H | 14.905665000 | 11.992924000 | 17.967780000 |
| C | 14.923212000 | 10.689669000 | 14.900837000 |
| H | 14.411057000 | 11.361170000 | 15.593330000 |
| H | 15.974383000 | 11.007924000 | 14.800305000 |
| H | 14.896574000 | 9.682147000  | 15.318332000 |
| C | 13.041361000 | 15.008307000 | 18.935035000 |
| H | 13.986997000 | 14.716512000 | 19.407748000 |
| C | 14.303058000 | 6.224880000  | 15.607622000 |
| H | 14.349761000 | 7.255231000  | 15.985494000 |
| C | 12.191711000 | 8.511287000  | 18.845737000 |
| H | 11.156028000 | 8.241333000  | 19.069145000 |
| H | 12.851965000 | 8.027609000  | 19.587010000 |
| H | 12.431736000 | 8.147015000  | 17.846209000 |
| C | 14.633842000 | 14.475602000 | 16.472532000 |
| H | 14.825007000 | 13.529186000 | 15.951173000 |
| C | 9.291334000  | 7.262768000  | 14.741350000 |
| H | 10.116769000 | 6.551485000  | 14.660370000 |
| H | 8.338810000  | 6.721793000  | 14.617112000 |
| H | 9.324074000  | 7.712241000  | 15.734506000 |
| C | 8.119565000  | 12.753499000 | 15.585920000 |
| H | 8.410117000  | 12.177159000 | 14.701833000 |
| H | 7.289596000  | 13.423331000 | 15.293446000 |
| C | 8.164606000  | 11.934288000 | 20.364904000 |
| H | 9.127329000  | 11.654492000 | 20.809211000 |
| H | 7.575428000  | 12.429620000 | 21.147766000 |
| H | 8.364590000  | 12.673628000 | 19.585000000 |
| C | 13.573885000 | 3.794459000  | 13.255265000 |
| H | 13.976588000 | 3.546603000  | 14.242056000 |
| H | 13.990373000 | 3.071746000  | 12.541153000 |
| H | 12.489408000 | 3.632426000  | 13.290841000 |
| C | 8.984718000  | 14.421316000 | 17.105480000 |
| H | 8.719035000  | 13.845384000 | 17.993308000 |
| H | 8.145617000  | 15.097264000 | 16.864941000 |
| H | 9.862118000  | 15.029581000 | 17.337579000 |
| C | 7.425091000  | 10.713955000 | 19.824970000 |
| H | 6.463972000  | 11.037702000 | 19.407734000 |
| C | 11.724933000 | 9.776025000  | 8.926641000  |



|   |              |              |              |
|---|--------------|--------------|--------------|
| H | 10.767146000 | 9.336636000  | 8.619634000  |
| C | 13.903479000 | 5.225352000  | 12.825091000 |
| H | 14.993398000 | 5.352501000  | 12.817087000 |
| C | 8.330316000  | 9.262201000  | 13.840788000 |
| H | 8.327145000  | 9.675502000  | 14.851542000 |
| H | 7.360630000  | 8.773224000  | 13.649175000 |
| H | 8.459127000  | 10.083683000 | 13.134025000 |
| C | 5.652653000  | 9.018984000  | 17.823901000 |
| H | 5.301601000  | 8.951070000  | 18.859052000 |
| H | 5.045049000  | 8.316372000  | 17.236916000 |
| H | 5.423835000  | 10.025223000 | 17.461626000 |
| C | 13.590804000 | 5.372912000  | 16.663118000 |
| H | 12.587910000 | 5.753313000  | 16.881781000 |
| H | 14.158580000 | 5.360193000  | 17.603234000 |
| H | 13.482802000 | 4.331295000  | 16.337511000 |
| C | 14.848354000 | 8.387834000  | 13.059913000 |
| H | 15.210232000 | 7.782686000  | 12.211912000 |
| H | 15.577782000 | 8.232401000  | 13.870364000 |
| C | 12.209530000 | 10.715861000 | 7.821344000  |
| H | 11.459091000 | 11.463358000 | 7.546229000  |
| H | 12.452376000 | 10.148006000 | 6.913634000  |
| H | 13.118256000 | 11.252093000 | 8.123339000  |
| C | 14.895573000 | 9.846421000  | 12.626114000 |
| H | 15.939886000 | 10.166283000 | 12.465453000 |
| H | 14.360380000 | 9.966460000  | 11.677397000 |
| C | 10.088536000 | 11.961525000 | 9.985027000  |
| H | 10.662822000 | 12.624110000 | 9.320776000  |
| C | 7.397934000  | 7.231155000  | 18.168625000 |
| H | 8.439449000  | 6.932966000  | 18.009351000 |
| H | 6.759969000  | 6.517002000  | 17.630750000 |
| H | 7.184723000  | 7.113197000  | 19.237615000 |
| C | 15.809982000 | 14.745621000 | 17.412902000 |
| H | 15.706852000 | 15.701417000 | 17.937924000 |
| H | 16.744520000 | 14.800293000 | 16.837507000 |
| H | 15.940574000 | 13.965704000 | 18.168452000 |
| C | 11.887415000 | 14.598772000 | 19.845555000 |
| H | 10.923653000 | 14.923644000 | 19.436528000 |
| H | 11.993701000 | 15.058497000 | 20.836710000 |
| H | 11.837433000 | 13.515494000 | 19.983808000 |
| C | 7.646723000  | 11.802594000 | 16.677681000 |
| H | 7.123755000  | 12.376072000 | 17.461417000 |
| H | 6.878836000  | 11.158119000 | 16.218736000 |
| C | 12.720479000 | 8.643508000  | 9.161238000  |
| H | 13.714532000 | 9.034680000  | 9.411020000  |

|   |              |              |              |
|---|--------------|--------------|--------------|
| H | 12.827834000 | 8.025621000  | 8.260153000  |
| H | 12.403696000 | 7.994403000  | 9.981973000  |
| C | 7.162627000  | 9.712090000  | 20.952700000 |
| H | 6.590797000  | 8.840262000  | 20.621928000 |
| H | 6.594302000  | 10.184785000 | 21.764594000 |
| H | 8.102455000  | 9.343844000  | 21.382421000 |
| C | 14.520801000 | 15.575876000 | 15.412270000 |
| H | 13.727926000 | 15.362695000 | 14.687969000 |
| H | 15.462444000 | 15.680847000 | 14.856927000 |
| H | 14.299920000 | 16.551588000 | 15.861080000 |
| C | 9.705998000  | 8.723440000  | 11.294439000 |
| H | 9.899371000  | 8.171460000  | 10.360725000 |
| H | 8.772896000  | 9.281759000  | 11.124430000 |
| C | 14.221326000 | 12.104600000 | 13.106406000 |
| H | 13.694788000 | 12.144159000 | 12.149499000 |
| H | 15.247013000 | 12.484315000 | 12.967912000 |
| H | 13.694106000 | 12.744720000 | 13.816249000 |
| C | 13.036927000 | 16.525032000 | 18.726329000 |
| H | 13.876143000 | 16.873715000 | 18.117301000 |
| H | 13.095288000 | 17.046989000 | 19.690515000 |
| H | 12.114070000 | 16.852954000 | 18.231757000 |
| C | 8.891494000  | 11.424844000 | 9.197404000  |
| H | 9.180998000  | 10.763971000 | 8.374098000  |
| H | 8.323246000  | 12.257060000 | 8.759407000  |
| H | 8.200310000  | 10.870760000 | 9.840600000  |
| C | 15.730451000 | 5.723105000  | 15.382996000 |
| H | 15.748239000 | 4.681886000  | 15.042284000 |
| H | 16.293960000 | 5.757862000  | 16.325734000 |
| H | 16.282974000 | 6.319674000  | 14.651712000 |
| C | 9.635824000  | 12.794900000 | 11.181709000 |
| H | 9.118097000  | 12.177531000 | 11.923662000 |
| H | 8.944499000  | 13.588061000 | 10.867786000 |
| H | 10.485102000 | 13.268585000 | 11.684732000 |

**[L<sub>4</sub>U<sub>2</sub>(N)<sub>2</sub>], 4 (s=0)**

|   |              |              |              |
|---|--------------|--------------|--------------|
| U | 11.788155000 | 9.629782000  | 13.833455000 |
| U | 11.030844000 | 11.284193000 | 16.577222000 |
| N | 11.643573000 | 9.459627000  | 15.860436000 |
| N | 11.183908000 | 11.465512000 | 14.555030000 |
| P | 11.450248000 | 10.741413000 | 10.544252000 |
| N | 9.447727000  | 8.310654000  | 13.727231000 |
| N | 10.811524000 | 9.599271000  | 11.672444000 |
| C | 9.489502000  | 7.684487000  | 12.392915000 |
| H | 8.558427000  | 7.123021000  | 12.201336000 |

|   |              |              |              |
|---|--------------|--------------|--------------|
| H | 10.315295000 | 6.963670000  | 12.402994000 |
| C | 9.298507000  | 7.268924000  | 14.750468000 |
| H | 10.127733000 | 6.561187000  | 14.677508000 |
| H | 8.349179000  | 6.722865000  | 14.624385000 |
| H | 9.323905000  | 7.724378000  | 15.741142000 |
| C | 11.722934000 | 9.777609000  | 8.924307000  |
| H | 10.766078000 | 9.334022000  | 8.620475000  |
| C | 8.332377000  | 9.258958000  | 13.834172000 |
| H | 8.320021000  | 9.675155000  | 14.843626000 |
| H | 7.366569000  | 8.764584000  | 13.637191000 |
| H | 8.462425000  | 10.078961000 | 13.125967000 |
| C | 12.200648000 | 10.718096000 | 7.816533000  |
| H | 11.446431000 | 11.462155000 | 7.542392000  |
| H | 12.443411000 | 10.150109000 | 6.908872000  |
| H | 13.107957000 | 11.258502000 | 8.115341000  |
| C | 10.078022000 | 11.955225000 | 9.984459000  |
| H | 10.646652000 | 12.618974000 | 9.316488000  |
| C | 12.723648000 | 8.649362000  | 9.157584000  |
| H | 13.716944000 | 9.044797000  | 9.403641000  |
| H | 12.830579000 | 8.030312000  | 8.257243000  |
| H | 12.411863000 | 8.000658000  | 9.980536000  |
| C | 9.720216000  | 8.713014000  | 11.296501000 |
| H | 9.919770000  | 8.156309000  | 10.366869000 |
| H | 8.784304000  | 9.264558000  | 11.120143000 |
| C | 8.880508000  | 11.411077000 | 9.202659000  |
| H | 9.170106000  | 10.750547000 | 8.379094000  |
| H | 8.306021000  | 12.239599000 | 8.765765000  |
| H | 8.194915000  | 10.854193000 | 9.849462000  |
| C | 9.625668000  | 12.789326000 | 11.180798000 |
| H | 9.112760000  | 12.171410000 | 11.925632000 |
| H | 8.930159000  | 13.579051000 | 10.867401000 |
| H | 10.474571000 | 13.267503000 | 11.680280000 |
| P | 13.162666000 | 6.451636000  | 14.082859000 |
| N | 14.230701000 | 10.726844000 | 13.607938000 |
| N | 13.497464000 | 8.037602000  | 13.471131000 |
| C | 13.358907000 | 5.502862000  | 11.426943000 |
| H | 12.264411000 | 5.431552000  | 11.401810000 |
| H | 13.751408000 | 4.771382000  | 10.707987000 |
| H | 13.635296000 | 6.499503000  | 11.074361000 |
| C | 14.926891000 | 10.690091000 | 14.898992000 |
| H | 14.417560000 | 11.361090000 | 15.594002000 |
| H | 15.977771000 | 11.008018000 | 14.794801000 |
| H | 14.901282000 | 9.682264000  | 15.315751000 |
| C | 14.316690000 | 6.226080000  | 15.604880000 |

|   |              |              |              |
|---|--------------|--------------|--------------|
| H | 14.364809000 | 7.256494000  | 15.982420000 |
| C | 13.573144000 | 3.794166000  | 13.257389000 |
| H | 13.979476000 | 3.546886000  | 14.242848000 |
| H | 13.986778000 | 3.070839000  | 12.542224000 |
| H | 12.488770000 | 3.632378000  | 13.297148000 |
| C | 13.901384000 | 5.224767000  | 12.825094000 |
| H | 14.991324000 | 5.351198000  | 12.811178000 |
| C | 13.611111000 | 5.373746000  | 16.664567000 |
| H | 12.608940000 | 5.752992000  | 16.888604000 |
| H | 14.183882000 | 5.361960000  | 17.601683000 |
| H | 13.502494000 | 4.331905000  | 16.339871000 |
| C | 14.846022000 | 8.389596000  | 13.056125000 |
| H | 15.206044000 | 7.785684000  | 12.206390000 |
| H | 15.578207000 | 8.234352000  | 13.864104000 |
| C | 14.890766000 | 9.848650000  | 12.623369000 |
| H | 15.934307000 | 10.168958000 | 12.458682000 |
| H | 14.351674000 | 9.969182000  | 11.676933000 |
| C | 14.218974000 | 12.106853000 | 13.107953000 |
| H | 13.689774000 | 12.147155000 | 12.152522000 |
| H | 15.244282000 | 12.486477000 | 12.966649000 |
| H | 13.694089000 | 12.746874000 | 13.819672000 |
| C | 15.743026000 | 5.725020000  | 15.372085000 |
| H | 15.759302000 | 4.683436000  | 15.032410000 |
| H | 16.312375000 | 5.761092000  | 16.311261000 |
| H | 16.290587000 | 6.321014000  | 14.636609000 |
| P | 12.906535000 | 14.136456000 | 17.243271000 |
| C | 11.990291000 | 10.444349000 | 20.214663000 |
| H | 12.010056000 | 11.534745000 | 20.255147000 |
| H | 12.695100000 | 10.058163000 | 20.972273000 |
| H | 10.985807000 | 10.106224000 | 20.480074000 |
| N | 12.857729000 | 12.427078000 | 17.556183000 |
| N | 12.326574000 | 9.967589000  | 18.873987000 |
| C | 13.702414000 | 10.332361000 | 18.517339000 |
| H | 13.913802000 | 9.857223000  | 17.554361000 |
| H | 14.419838000 | 9.929131000  | 19.256740000 |
| C | 13.896614000 | 11.837553000 | 18.388411000 |
| H | 13.922131000 | 12.294560000 | 19.392118000 |
| H | 14.904957000 | 11.988215000 | 17.968859000 |
| C | 13.044623000 | 15.006310000 | 18.937432000 |
| H | 13.989136000 | 14.711917000 | 19.410794000 |
| C | 12.184910000 | 8.511044000  | 18.844274000 |
| H | 11.148661000 | 8.242259000  | 19.066673000 |
| H | 12.843920000 | 8.026150000  | 19.585853000 |
| H | 12.425412000 | 8.147163000  | 17.844687000 |

|   |              |              |              |
|---|--------------|--------------|--------------|
| C | 14.638309000 | 14.473407000 | 16.475965000 |
| H | 14.828223000 | 13.527406000 | 15.953420000 |
| C | 15.814133000 | 14.739762000 | 17.417743000 |
| H | 15.712672000 | 15.695210000 | 17.943705000 |
| H | 16.749328000 | 14.792924000 | 16.843273000 |
| H | 15.942186000 | 13.958703000 | 18.172528000 |
| C | 11.888875000 | 14.598428000 | 19.846411000 |
| H | 10.926340000 | 14.926931000 | 19.437399000 |
| H | 11.995867000 | 15.055909000 | 20.838518000 |
| H | 11.835649000 | 13.515029000 | 19.982513000 |
| C | 14.528303000 | 15.575445000 | 15.417226000 |
| H | 13.735971000 | 15.364676000 | 14.691612000 |
| H | 15.470792000 | 15.679694000 | 14.863178000 |
| H | 14.308508000 | 16.550857000 | 15.867215000 |
| C | 13.043909000 | 16.523236000 | 18.730262000 |
| H | 13.884929000 | 16.870605000 | 18.122971000 |
| H | 13.101941000 | 17.044056000 | 19.695080000 |
| H | 12.122593000 | 16.853767000 | 18.234572000 |
| P | 8.433801000  | 9.854963000  | 18.450868000 |
| N | 8.756920000  | 11.039781000 | 17.220067000 |
| N | 9.298518000  | 13.533943000 | 15.989398000 |
| C | 9.756601000  | 14.342934000 | 14.858386000 |
| H | 10.661451000 | 14.886137000 | 15.142504000 |
| H | 8.987404000  | 15.071820000 | 14.548928000 |
| H | 9.998063000  | 13.689152000 | 14.019622000 |
| C | 7.124887000  | 8.667746000  | 17.687639000 |
| H | 7.389401000  | 8.715626000  | 16.624381000 |
| C | 8.119468000  | 12.757725000 | 15.586024000 |
| H | 8.409482000  | 12.182230000 | 14.701234000 |
| H | 7.290844000  | 13.429544000 | 15.294404000 |
| C | 8.164788000  | 11.934001000 | 20.364206000 |
| H | 9.126738000  | 11.651153000 | 20.808237000 |
| H | 7.577122000  | 12.430442000 | 21.147507000 |
| H | 8.366758000  | 12.673356000 | 19.584836000 |
| C | 8.987240000  | 14.422524000 | 17.107915000 |
| H | 8.720279000  | 13.846060000 | 17.995016000 |
| H | 8.149447000  | 15.100201000 | 16.867869000 |
| H | 9.865715000  | 15.028925000 | 17.340853000 |
| C | 7.421676000  | 10.716256000 | 19.823381000 |
| H | 6.461434000  | 11.043179000 | 19.406607000 |
| C | 5.643966000  | 9.028602000  | 17.820569000 |
| H | 5.292689000  | 8.962348000  | 18.855758000 |
| H | 5.034159000  | 8.327647000  | 17.233888000 |
| H | 5.418434000  | 10.035380000 | 17.457754000 |

|   |             |              |              |
|---|-------------|--------------|--------------|
| C | 7.383491000 | 7.235207000  | 18.165524000 |
| H | 8.424385000 | 6.934125000  | 18.007583000 |
| H | 6.744169000 | 6.522927000  | 17.626791000 |
| H | 7.168656000 | 7.117756000  | 19.234243000 |
| C | 7.644563000 | 11.806091000 | 16.676227000 |
| H | 7.122189000 | 12.379305000 | 17.460571000 |
| H | 6.875801000 | 11.163655000 | 16.215918000 |
| C | 7.156571000 | 9.714226000  | 20.950320000 |
| H | 6.581704000 | 8.844586000  | 20.619056000 |
| H | 6.590210000 | 10.188021000 | 21.762945000 |
| H | 8.095435000 | 9.342546000  | 21.379203000 |

**[L<sub>4</sub>U<sub>2</sub>(N)<sub>2</sub>], 4 (s=0), open-shell singlet**

|   |              |              |              |
|---|--------------|--------------|--------------|
| U | 11.770403000 | 9.641510000  | 13.869447000 |
| U | 10.984573000 | 11.289694000 | 16.627960000 |
| P | 8.481331000  | 9.639112000  | 18.620066000 |
| P | 12.867705000 | 14.303897000 | 17.083407000 |
| P | 11.665229000 | 10.866186000 | 10.591662000 |
| P | 12.947499000 | 6.413499000  | 14.085267000 |
| N | 11.629037000 | 9.377578000  | 15.774968000 |
| N | 9.416603000  | 8.367425000  | 13.615663000 |
| N | 11.194096000 | 11.387508000 | 14.441184000 |
| N | 14.253764000 | 10.652821000 | 13.652286000 |
| C | 11.923952000 | 10.653209000 | 20.101627000 |
| H | 11.853772000 | 11.742469000 | 20.069737000 |
| H | 12.622276000 | 10.369956000 | 20.907650000 |
| H | 10.936845000 | 10.249478000 | 20.338068000 |
| N | 12.776146000 | 12.620156000 | 17.496312000 |
| N | 12.356587000 | 10.125329000 | 18.806182000 |
| N | 10.940243000 | 9.720849000  | 11.669767000 |
| N | 8.776013000  | 10.887210000 | 17.449708000 |
| N | 9.197431000  | 13.353270000 | 16.097280000 |
| N | 13.378425000 | 7.987725000  | 13.491357000 |
| C | 9.518812000  | 14.174691000 | 14.925494000 |
| H | 10.433803000 | 14.741764000 | 15.114938000 |
| H | 8.702300000  | 14.881445000 | 14.700820000 |
| H | 9.687574000  | 13.527442000 | 14.064163000 |
| C | 13.719856000 | 10.565806000 | 18.482597000 |
| H | 13.987954000 | 10.083871000 | 17.537424000 |
| H | 14.432805000 | 10.212365000 | 19.249911000 |
| C | 9.514258000  | 7.818000000  | 12.250088000 |
| H | 8.582682000  | 7.290951000  | 11.979789000 |
| H | 10.324511000 | 7.080193000  | 12.257960000 |
| C | 7.200496000  | 8.458264000  | 17.791088000 |

|   |              |              |              |
|---|--------------|--------------|--------------|
| H | 7.442566000  | 8.597394000  | 16.729369000 |
| C | 13.261089000 | 5.460491000  | 11.440234000 |
| H | 12.169436000 | 5.406201000  | 11.348299000 |
| H | 13.684064000 | 4.724960000  | 10.743173000 |
| H | 13.573898000 | 6.453729000  | 11.109060000 |
| C | 13.836184000 | 12.077420000 | 18.337019000 |
| H | 13.839945000 | 12.539446000 | 19.339007000 |
| H | 14.839229000 | 12.265804000 | 17.920964000 |
| C | 14.932439000 | 10.615132000 | 14.952463000 |
| H | 14.449937000 | 11.329817000 | 15.621832000 |
| H | 15.998346000 | 10.880671000 | 14.852369000 |
| H | 14.857651000 | 9.621127000  | 15.395725000 |
| C | 13.124120000 | 15.267498000 | 18.714191000 |
| H | 14.102078000 | 15.000742000 | 19.132871000 |
| C | 14.000611000 | 6.153486000  | 15.670343000 |
| H | 14.069649000 | 7.184043000  | 16.044412000 |
| C | 12.323575000 | 8.660240000  | 18.855386000 |
| H | 11.305604000 | 8.323941000  | 19.067207000 |
| H | 12.996335000 | 8.273056000  | 19.639682000 |
| H | 12.621788000 | 8.256743000  | 17.886521000 |
| C | 14.585773000 | 14.540449000 | 16.234640000 |
| H | 14.743420000 | 13.547290000 | 15.795628000 |
| C | 9.218368000  | 7.270771000  | 14.571521000 |
| H | 10.049506000 | 6.565768000  | 14.497057000 |
| H | 8.272409000  | 6.739759000  | 14.374437000 |
| H | 9.200443000  | 7.672162000  | 15.585541000 |
| C | 7.992227000  | 12.559390000 | 15.815539000 |
| H | 8.205782000  | 11.969806000 | 14.917766000 |
| H | 7.139998000  | 13.222850000 | 15.581592000 |
| C | 8.109440000  | 11.660024000 | 20.589726000 |
| H | 9.058886000  | 11.405951000 | 21.075147000 |
| H | 7.471842000  | 12.132026000 | 21.348762000 |
| H | 8.322133000  | 12.408588000 | 19.821343000 |
| C | 13.308835000 | 3.748379000  | 13.277996000 |
| H | 13.652414000 | 3.483705000  | 14.282623000 |
| H | 13.731677000 | 3.011081000  | 12.582947000 |
| H | 12.218474000 | 3.628593000  | 13.260189000 |
| C | 8.996080000  | 14.232040000 | 17.251322000 |
| H | 8.842365000  | 13.646339000 | 18.159742000 |
| H | 8.125724000  | 14.894168000 | 17.107471000 |
| H | 9.886656000  | 14.849944000 | 17.384417000 |
| C | 7.429510000  | 10.421229000 | 20.012320000 |
| H | 6.456934000  | 10.716181000 | 19.599390000 |
| C | 11.953598000 | 9.921246000  | 8.962326000  |

|   |              |              |              |
|---|--------------|--------------|--------------|
| H | 10.992742000 | 9.522272000  | 8.612665000  |
| C | 13.713613000 | 5.165800000  | 12.867153000 |
| H | 14.806165000 | 5.252394000  | 12.916563000 |
| C | 8.292074000  | 9.304360000  | 13.724188000 |
| H | 8.212646000  | 9.642540000  | 14.758928000 |
| H | 7.343402000  | 8.821904000  | 13.435195000 |
| H | 8.455132000  | 10.175295000 | 13.087284000 |
| C | 5.705998000  | 8.729545000  | 17.973985000 |
| H | 5.379312000  | 8.559473000  | 19.005577000 |
| H | 5.120368000  | 8.047686000  | 17.341605000 |
| H | 5.419008000  | 9.748966000  | 17.700498000 |
| C | 13.192924000 | 5.341024000  | 16.688001000 |
| H | 12.202722000 | 5.775780000  | 16.856790000 |
| H | 13.712359000 | 5.298340000  | 17.654675000 |
| H | 13.044624000 | 4.306507000  | 16.355521000 |
| C | 14.762449000 | 8.282258000  | 13.148325000 |
| H | 15.134263000 | 7.648619000  | 12.326512000 |
| H | 15.443854000 | 8.104657000  | 13.995611000 |
| C | 12.508188000 | 10.866765000 | 7.895312000  |
| H | 11.794503000 | 11.647016000 | 7.613533000  |
| H | 12.760726000 | 10.310330000 | 6.983262000  |
| H | 13.425002000 | 11.362204000 | 8.239451000  |
| C | 14.895194000 | 9.729159000  | 12.697494000 |
| H | 15.958609000 | 9.991755000  | 12.560494000 |
| H | 14.389630000 | 9.862822000  | 11.734961000 |
| C | 10.358239000 | 12.141049000 | 10.014942000 |
| H | 10.978917000 | 12.800428000 | 9.390000000  |
| C | 7.534992000  | 7.009370000  | 18.160646000 |
| H | 8.584463000  | 6.769319000  | 17.959572000 |
| H | 6.914347000  | 6.305081000  | 17.590190000 |
| H | 7.354007000  | 6.812602000  | 19.224374000 |
| C | 15.802862000 | 14.873440000 | 17.100262000 |
| H | 15.740218000 | 15.878899000 | 17.530437000 |
| H | 16.716824000 | 14.847732000 | 16.490454000 |
| H | 15.945758000 | 14.170027000 | 17.925790000 |
| C | 12.048212000 | 14.927886000 | 19.741837000 |
| H | 11.049081000 | 15.201645000 | 19.383361000 |
| H | 12.219739000 | 15.480134000 | 20.675388000 |
| H | 12.032735000 | 13.862175000 | 19.986898000 |
| C | 7.619143000  | 11.631322000 | 16.963470000 |
| H | 7.146556000  | 12.222940000 | 17.766119000 |
| H | 6.826126000  | 10.971204000 | 16.577129000 |
| C | 12.901271000 | 8.749368000  | 9.202078000  |
| H | 13.898703000 | 9.098469000  | 9.495632000  |



|   |              |              |              |
|---|--------------|--------------|--------------|
| H | 13.018876000 | 8.151525000  | 8.288783000  |
| H | 12.533981000 | 8.089779000  | 9.992949000  |
| C | 7.203423000  | 9.379104000  | 21.110920000 |
| H | 6.678631000  | 8.489185000  | 20.750172000 |
| H | 6.604502000  | 9.801407000  | 21.928712000 |
| H | 8.156179000  | 9.045668000  | 21.540791000 |
| C | 14.448473000 | 15.541531000 | 15.082921000 |
| H | 13.624382000 | 15.278224000 | 14.411537000 |
| H | 15.368875000 | 15.582888000 | 14.484713000 |
| H | 14.256633000 | 16.556843000 | 15.450813000 |
| C | 9.818662000  | 8.902051000  | 11.227734000 |
| H | 10.020774000 | 8.394112000  | 10.271698000 |
| H | 8.911697000  | 9.502519000  | 11.061745000 |
| C | 14.312660000 | 12.022721000 | 13.126717000 |
| H | 13.808882000 | 12.063645000 | 12.158248000 |
| H | 15.357197000 | 12.354669000 | 13.007455000 |
| H | 13.798324000 | 12.698819000 | 13.811977000 |
| C | 13.110103000 | 16.767039000 | 18.405654000 |
| H | 13.884999000 | 17.059078000 | 17.690456000 |
| H | 13.271123000 | 17.353806000 | 19.319732000 |
| H | 12.144437000 | 17.073483000 | 17.984568000 |
| C | 9.176949000  | 11.665420000 | 9.167469000  |
| H | 9.476799000  | 11.012288000 | 8.341761000  |
| H | 8.657369000  | 12.527107000 | 8.725952000  |
| H | 8.440213000  | 11.123962000 | 9.769402000  |
| C | 15.415437000 | 5.591370000  | 15.524618000 |
| H | 15.409735000 | 4.550822000  | 15.181253000 |
| H | 15.926359000 | 5.601446000  | 16.497438000 |
| H | 16.032587000 | 6.166317000  | 14.828159000 |
| C | 9.885799000  | 12.959929000 | 11.214410000 |
| H | 9.307131000  | 12.344119000 | 11.910596000 |
| H | 9.243222000  | 13.789662000 | 10.891305000 |
| H | 10.728026000 | 13.383846000 | 11.770203000 |

## 5. References

1. K. Li, J. He, Y. Zhao and C. Zhu, *Inorg. Chem. Front.*, 2023, **10**, 5622.
2. O. Dolomanov, L. Bourhis, R. Gildea, J. Howard and H. Puschmann, *J. Appl. Crystallogr.*, 2009, **42**, 339.
3. L. Bourhis, O. Dolomanov, R. Gildea, J. Howard and H. Puschmann, *Acta Crystallogr., Sect. A: Found. Adv.*, 2015, **71**, 59.
4. G. Sheldrick, *Acta Crystallogr., Sect. A: Found. Crystallogr.*, 2008, **64**, 112
5. A. D. Becke, *J. Chem. Phys.*, 1993, **98**, 5648
6. (a) D. Andrae, U. Häussermann, M. Dolg, H. Stoll and H. Preuss, *Theor. Chim. Acta*, 1990, **77**, 123; (b) J. M. L. Martin and A. Sundermann, *J. Chem. Phys.*, 2001, **114**, 3408; (c) W. Kuechle, M. Dolg, H. Stoll and H. Preuss, *J. Chem. Phys.* 1994, **100**, 7535; (d) X. Cao, M. Dolg and H. Stoll, *J. Chem. Phys.* 2003, **118**, 487; (e) X. Cao, M. Dolg and J. Molec. Struct. (Theochem). 2004, **673**, 203.
7. A. Hollwarth, M. Bohme, S. Dapprich, A.W. Ehlers, A. Gobbi, V. Jonas, K.F. Kohler, R. Stegmann, A. Veldkamp and G. Frenking *J. Chem. Phys.* 1993, **208**, 237.
8. (a) R. Ditchfield, W. J. Hehre and J. A. Pople, *J. Chem. Phys.*, 1971, **54**, 724; (b) W. J. Hehre, R. Ditchfield and J. A. Pople, *J. Chem. Phys.*, 1972, **56**, 2257; (c) P. C. Hariharan and J. A. Pople, *Theor. Chem. Acc.*, 1973, **28**, 213.
9. A. V. Marenich, C. J. Cramer, and D. G. Truhlar *J. Phys. Chem. B*, 2009, **113**, 6378.
10. Gaussian 09, Revision D.01: M. J. Frisch, G. W. Trucks, H. B. Schlegel, G. E. Scuseria, M. A. Robb, J. R. Cheesman, G. Scalmani, V. Barone, B. Mennucci, G. A. Petersson, H. Nakatsuji, M. Caricato, X. Li, H. P. Hratchian, A. F. Izmaylov, J. Bloino, G. Zheng, J. L. Sonnenberg, M. Hada, M. Ehara, K. Toyota, R. Fukuda, J. Hasegawa, M. Ishida, T. Nakajima, Y. Honda, O. Kitao, H. Nakai, T. Vreven, J. A., Jr. Montgomery, J. E. Peralta, F. Ogliaro, M. Bearpark, J. J. Heyd, E. Brothers, K. N. Kudin, V. N. Staroverov, R. Kobayashi, J. Normand, K. Raghavachari, J. C. Burant, S. S. Iyengar, J. Tomasi, M. Cossi, N. Rega, M. J. Millam, M. Klene, J. E. Knox, J. B. Cross, V. Bakken, C. Adamo, J. Jaramillo, R. Gomperts, R. E. Stratmann, O. Yazyev, A. J. Austin, R. Cammi, C. Pomelli, J. W. Ochterski, R. L. Martin, K. Morokuma, V. G. Zakrzewski, G. A. Voth, P. Salvador, J. J. Dannenberg, S. Dapprich, A. D. Daniels, O. Farkas, J. B. Foresman, J. V. Ortiz, J. Cioslowski and D. J. Fox, Gaussian Inc., 2009, Wallingford CT.
